# Supplementary material for: Photo-triggered C-arylation of active-methylene compounds with diazonium salts via an electron donor–acceptor (EDA) complex
Source: Royal Society of Chemistry journal article supplement (doi:10.1039/d3cc05356c), 2023-12-20

## **Photo-Triggered C-Arylation of Active-Methylene Compounds with Diazonium salts Via Electron Donor-Acceptor (EDA) Complex**

Shikha Pandey, Arsala Kamal, Ambuj Kumar Kushwaha, Himanshu Kumar Singh, Suresh  
Kumar Maury and Sundaram Singh\*

Department of Chemistry, Indian Institute of Technology (BHU), Varanasi-221005

\* Address for Correspondence

Dr. Sundaram Singh, Department of Chemistry, Indian Institute of Technology (BHU),  
Varanasi – 221 005, U.P., India,

E-mail: [sundaram.apc@itbhu.ac.in](mailto:sundaram.apc@itbhu.ac.in)

Tel: +91 9451658650

*\*Corresponding author: Dr. Sundaram Singh, Associate Professor of Organic chemistry.*

ORCID: <https://orcid.org/0000-0001-7931-9652>

*E-mail: [sundaram.apc@iitbhu.ac.in](mailto:sundaram.apc@iitbhu.ac.in), Tel: +919451658650*

## Table of Content

|                                                       |     |
|-------------------------------------------------------|-----|
| 1. General considerations                             | S3  |
| 2. Experimental Procedures                            | S3  |
| 2.1 General procedure for the preparation of compound | S3  |
| 3. Mechanism Study                                    | S3  |
| 3.1. Radical trapping experiments                     | S3  |
| 3.2 UV-Vis absorption experiment                      | S5  |
| 3.3 On/off experiment                                 | S5  |
| 3.4 Jobs Plot                                         | S6  |
| 4. Characterization of product                        | S6  |
| 5. <sup>1</sup> H NMR <sup>13</sup> C NMR Spectra     | S16 |
| 6. HRMS Spectra (Figures S4-S11)                      | S43 |
| 7. Optimization -Table                                | S48 |
| 8. Comparison-Table                                   | S49 |

## 1. General consideration

All commercially available reagents and solvents were used directly without further purification. All reactions were conducted under an oxygen atmosphere and oven-dried glassware were used. All reactions were conducted using a blue light-emitting diode (LED) as the visible light source. The progress of reaction measured by thin-layer chromatography (TLC) and visualized using UV light. Melting points were determined on a digital melting point apparatus and temperatures were uncorrected. UV-visible spectroscopy of reaction solution was recorded on a SHIMADZU UV-3600 UV-visible spectrophotometer. Perkin Elmer Micro analyzer was used for (C and H, All the  $^1\text{H}$  and  $^{13}\text{C}$  spectra were recorded through Bruker 500 MHz spectrometer ( $^1\text{H}$  NMR at 500 MHz,  $^{13}\text{C}$  NMR at 126 MHz), in DMSO-*d* 6 and chemical shift was indicated in  $\delta$  ppm, using TMS as an internal standard. HRMS (*m/z*) were recorded in an electron ionization or electrospray ionization (ESI) mode on Waters-Q-TOF Premier-HAB213 and Sciex X500R QTOF instruments.

## 2. Experimental procedure

### 2.1 General procedure for the preparation compound 4a-4i, 4aa-4ak, 5a-5c and 6a-6d.

At first, the benzene diazonium tetrafluoroborate **2a** (1 mmol) was prepared from the amines and after that, added active methylene **1a** (1 mmol) compound in presence of pyridine and dry DMSO as a solvent in insitu condition. Then, the reaction-mixture was stirred at room-temperature and irradiated with blue LED strip at 40-45 min. and thus, the obtained precipitate was filtered and recrystallized.

## 3. Mechanistic investigation

### 3.1 Radical trapping experiment

To find out the mechanism of the reaction, control experiments were done. Firstly, a radical scavenger TEMPO was added to the reaction- mixture and found that the compound **4a** was obtained in trace amount which showed that the radicals are involved in this reaction. The TEMPO adduct was confirmed from HRMS data.

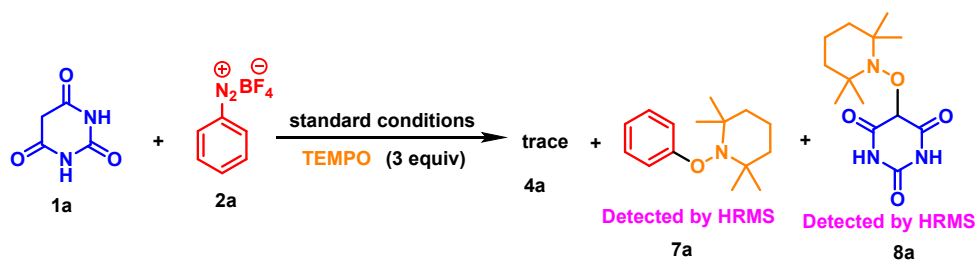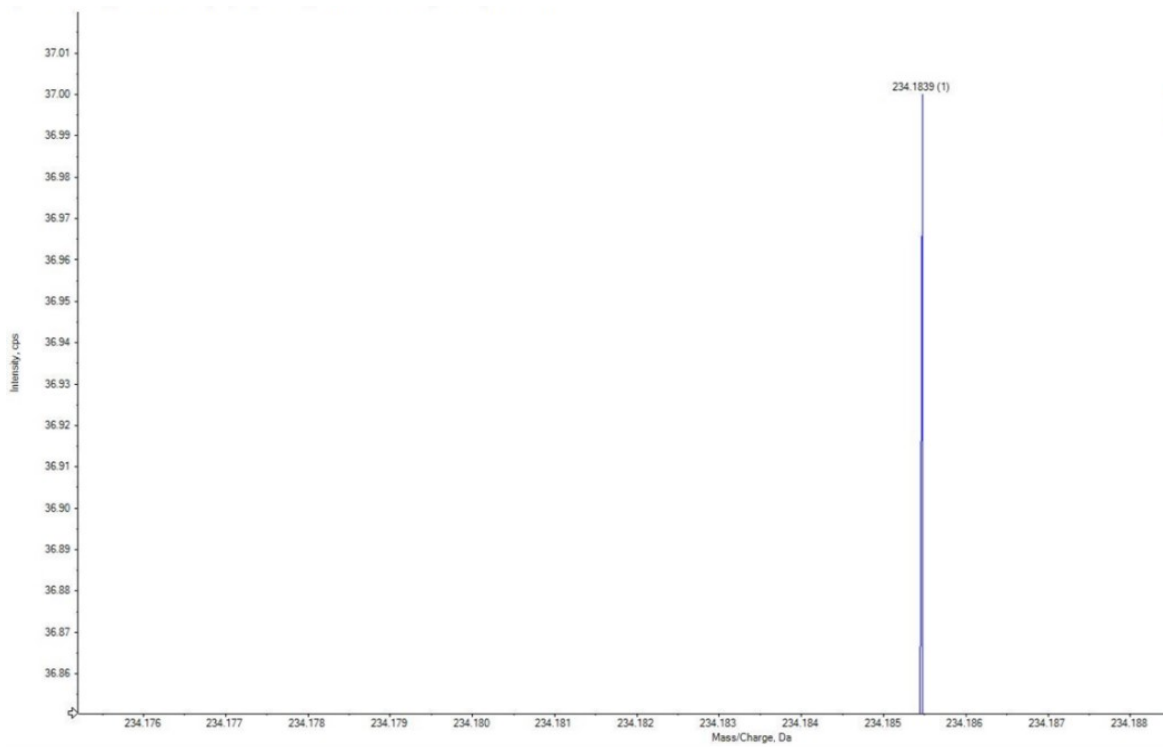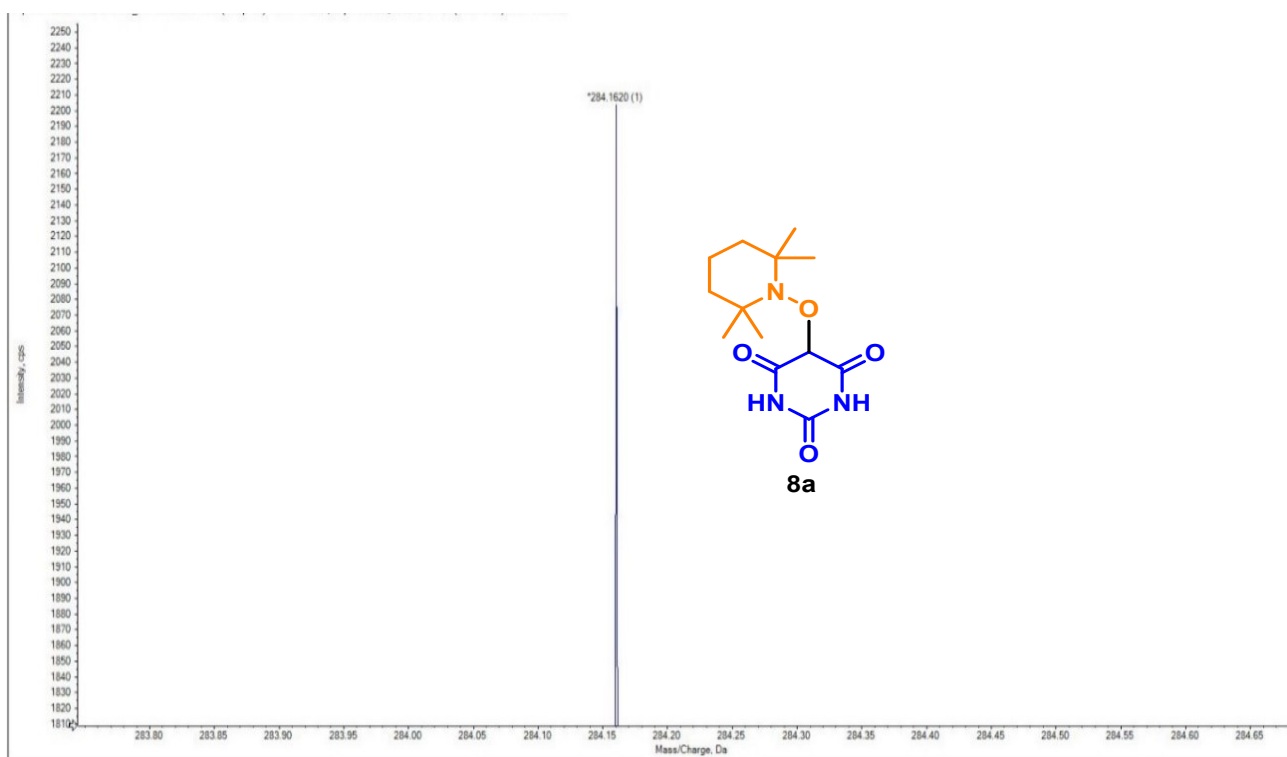

### 3.2 UV-Vis absorption experiment

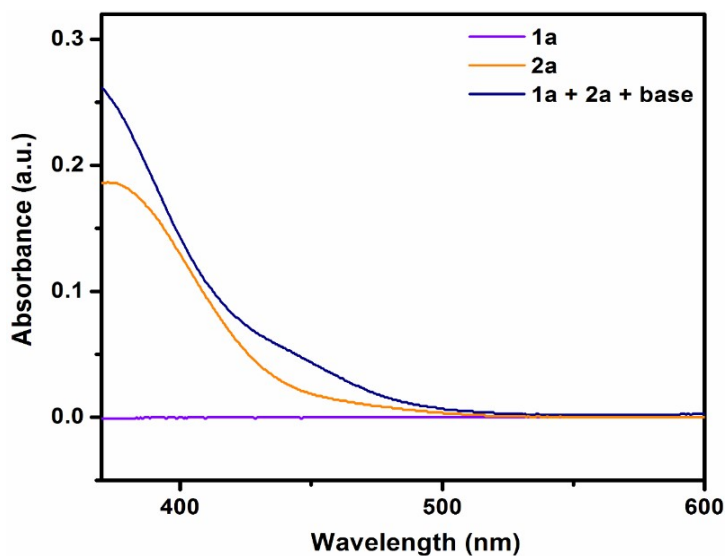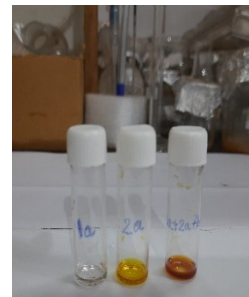

**Figure S1.** Absorption spectra of **1a**, **2a** and mixture of **1a+2a** and base (left) and photographs of the solutions of **1a**, **2a** and mixture (right).

### 3.3 ON/OFF experiment

The on/off experiment was carried out to see the role of visible light in the reaction. For this, the reaction -mixture was subjected for stirring under visible-light irradiation followed by stirring in the absence of visible-light irradiation at particular time- intervals and we found that reaction proceeds when the mixture was allowed under visible-light and in absence of visible-light, reaction was suspended. Thus, this experiment showed the effect of visible light in the reaction.

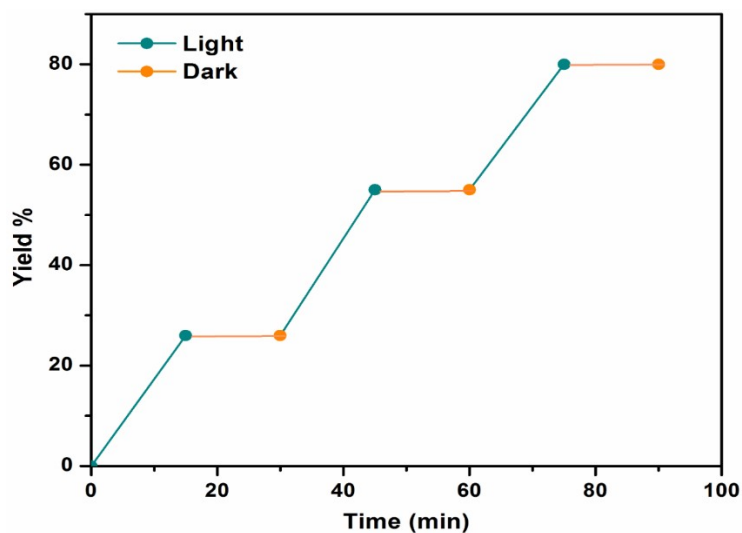

Figure S2. Light on/off experiment

### 3.4 Job's Plot

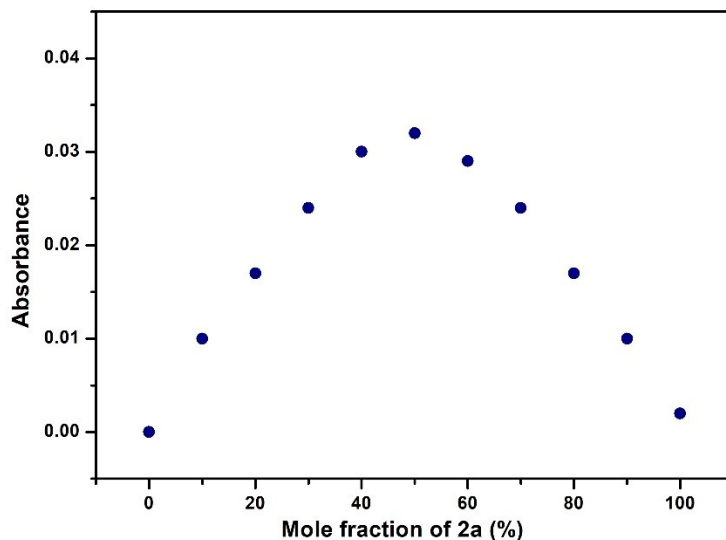

Figure S3. Job's Plot

The Job's plot approach was used for calculating the stoichiometry of the EDA complexes **1a** and **2a**. The Job's plot of the EDA complex between **1a** and **2a** was calculated determining the absorption of Acetonitrile solutions at 490 nm with different donor/acceptor ratios with constant concentration (0.02 M) of the two components. The molar fraction (%) of **2a** was plotted against the absorbance values. A Job's plot study of the EDA complex between **1a** and **2a** revealed a highest absorbance at 50% of 2a's molar fraction, indicating that the EDA complex in solution is 1:1 stoichiometric.

## 4. Characterization data of compounds

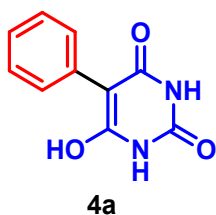

**6-hydroxy-5-phenylpyrimidine-2,4(1H,3H)-dione (4a)**: 84% yield. Yellow solid. m.p: 247-248 °C

$^1\text{H NMR}$  (500 MHz, DMSO- $d_6$ )  $\delta$  14.15 (s, 1H), 11.51 (s, 1H), 11.29 (s, 1H), 7.58 (d,  $J$  = 9.6 Hz, 2H), 7.50 – 7.44 (m, 2H), 7.25 (t,  $J$  = 7.8 Hz, 1H).

$^{13}\text{C NMR}$  (126 MHz, DMSO- $d_6$ )  $\delta$  162.6, 160.3, 150.2, 141.8, 130.1, 126.5, 118.2, 117.1.

HRMS (ESI) m/z: [M+H]<sup>+</sup> calculated for C<sub>10</sub>H<sub>9</sub>N<sub>2</sub>O<sub>3</sub> 205.0613; found: 205.0615.

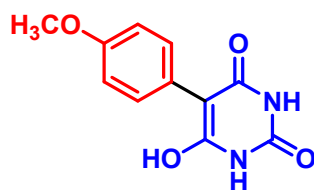

4b

**6-hydroxy-5-(4-methoxyphenyl) pyrimidine-2,4(1H,3H)-dione (4b):** 91% yield. Yellow solid.

m.p: 236-237 °C

<sup>1</sup>H NMR (500 MHz, DMSO-d<sub>6</sub>) δ 14.29 (s, 1H), 11.43 (s, 1H), 11.21 (s, 1H), 7.56 (d, *J* = 9.1 Hz, 2H), 7.0 (d, *J* = 9.1 Hz, 2H), 3.79 (s, 3H).

<sup>13</sup>C NMR (126 MHz, DMSO-d<sub>6</sub>) δ 162.7, 160.4, 158.3, 150.3, 135.2, 118.7, 115.4, 55.9.

HRMS (ESI) m/z: [M+H]<sup>+</sup> calculated for C<sub>11</sub>H<sub>11</sub>N<sub>2</sub>O<sub>4</sub> 235.0718; found: 235.0716.

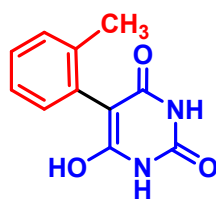

4c

**6-hydroxy-5-(o-tolyl) pyrimidine-2,4(1H,3H)-dione (4c):** 79% yield. Brownish solid. m.p: 229-230 °C

<sup>1</sup>H NMR (500 MHz, DMSO-d<sub>6</sub>) δ 14.50 (s, 1H), 11.60 (s, 1H), 11.34 (s, 1H), 7.68 (d, *J* = 8.0 Hz, 1H), 7.37 (d, *J* = 7.7 Hz, 1H), 7.34 – 7.31 (m, 1H), 7.21 – 7.14 (m, 1H), 2.36 (s, 3H).

<sup>13</sup>C NMR (126 MHz, DMSO-d<sub>6</sub>) δ 163.3, 160.2, 150.2, 139.6, 131.6, 128.0, 126.3, 126.0, 118.9, 115.3, 16.7.

HRMS (ESI) m/z: [M+H]<sup>+</sup> calculated for C<sub>11</sub>H<sub>11</sub>N<sub>2</sub>O<sub>3</sub> 219.0769; found: 219.0761.

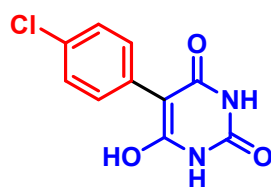

4d

**5-(4-chlorophenyl)-6-hydroxypyrimidine-2,4(1H,3H)-dione(4d):** 89% yield. Yellow solid.

m.p: 217-218 °C

**<sup>1</sup>H NMR** (500 MHz, DMSO-*d*<sub>6</sub>) δ 14.04 (s, 1H), 11.53 (s, 1H), 11.32 (s, 1H), 7.61 (d, *J* = 9.0 Hz, 2H), 7.50 (d, *J* = 8.9 Hz, 2H).

**<sup>13</sup>C NMR** (126 MHz, DMSO-*d*<sub>6</sub>) δ 162.3, 160.2, 150.2, 140.9, 130.1, 130.0, 118.7, 118.6.

**HRMS** (ESI) *m/z*: [M+H]<sup>+</sup> + calculated for C<sub>10</sub>H<sub>8</sub>ClN<sub>2</sub>O<sub>3</sub> 239.0223; found: 239.0224.

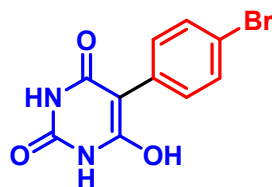

**4e**

**5-(4-bromophenyl)-6-hydroxypyrimidine-2,4(1H,3H)-dione (4e)**: 81% yield. Yellow solid.  
m.p: 221-222 °C

**<sup>1</sup>H NMR** (500 MHz, DMSO-*d*<sub>6</sub>) δ 14.04 (s, 1H), 11.53 (s, 1H), 11.32 (s, 1H), 7.61 (d, *J* = 9.0 Hz, 2H), 7.50 (d, *J* = 8.9 Hz, 2H).

**<sup>13</sup>C NMR** (126 MHz, DMSO-*d*<sub>6</sub>) δ 162.3, 160.2, 150.2, 140.9, 130.1, 130.0, 118.7, 118.6.

**HRMS** (ESI) *m/z*: [M+H]<sup>+</sup> + calculated for C<sub>10</sub>H<sub>8</sub>BrN<sub>2</sub>O<sub>3</sub> 282.9718; found: 282.9719.

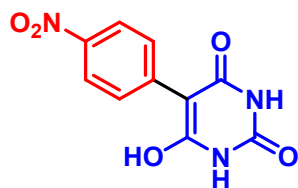

**4f**

**6-hydroxy-5-(4-nitrophenyl) pyrimidine-2,4(1H,3H)-dione (4f)**: 78% yield. Yellow solid.  
m.p: 239-240 °C

**<sup>1</sup>H NMR** (500 MHz, DMSO-*d*<sub>6</sub>) δ 13.98 (s, 1H), 11.66 (s, 1H), 11.44 (s, 1H), 8.32 (d, *J* = 9.2 Hz, 2H), 7.79 (d, *J* = 9.2 Hz, 2H).

**<sup>13</sup>C NMR** (126 MHz, DMSO-*d*<sub>6</sub>) δ 162.0, 159.9, 150.2, 147.4, 144.2, 126.0, 121.2, 117.1.

**HRMS** (ESI) *m/z*: [M+H]<sup>+</sup> + calculated for C<sub>10</sub>H<sub>8</sub>N<sub>3</sub>O<sub>5</sub> 250.0463; found; 250.0464.

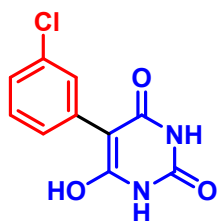

**4g**



**5-(3-chlorophenyl)-6-hydroxypyrimidine-2,4(1H,3H)-dione (4g):** 82% yield. Light yellow solid. m.p: 225-226°C

**<sup>1</sup>H NMR** (500 MHz, DMSO-*d*<sub>6</sub>) δ 13.96 (s, 1H), 11.56 (s, 1H), 11.35 (s, 1H), 7.67 (s, 1H), 7.56 (d, *J* = 8.2 Hz, 1H), 7.46 (t, *J* = 8.1 Hz, 1H), 7.27 (d, *J* = 8.0 Hz, 1H).

**<sup>13</sup>C NMR** (126 MHz, DMSO-*d*<sub>6</sub>) δ 162.2, 160.2, 150.2, 143.4, 134.5, 131.7, 125.7, 119.1, 116.6, 115.8.

**HRMS** (ESI) *m/z*: [M+H]<sup>+</sup> + calculated for C<sub>10</sub>H<sub>8</sub>ClN<sub>2</sub>O<sub>3</sub> 239.0223; found: 239.0236.

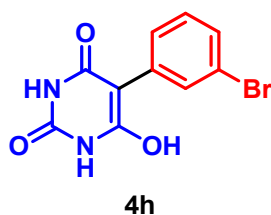

**5-(3-bromophenyl)-6-hydroxypyrimidine-2,4(1H,3H)-dione (4h):** 75% yield. Yellow solid. m.p: 220-221 °C

**<sup>1</sup>H NMR** (500 MHz, DMSO-*d*<sub>6</sub>) δ 13.96 (s, 1H), 11.56 (s, 1H), 11.35 (s, 1H), 7.67 (s, 1H), 7.56 (d, *J* = 8.2 Hz, 1H), 7.46 (d, *J* = 8.1 Hz, 1H), 7.27 (dd, *J* = 8.2, 1.0 Hz, 1H).

**<sup>13</sup>C NMR** (126 MHz, DMSO-*d*<sub>6</sub>) δ 162.2, 160.2, 150.2, 143.4, 134.5, 131.7, 125.7, 119.1, 116.6, 115.8.

**HRMS** (ESI) *m/z*: [M+H]<sup>+</sup> + calculated for C<sub>10</sub>H<sub>8</sub>BrN<sub>2</sub>O<sub>3</sub> 282.9718; found: 282.9717.

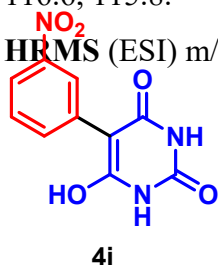

**6-hydroxy-5-(3-nitrophenyl) pyrimidine-2,4(1H,3H)-dione (4i):** 73% yield. Yellow solid. m.p: 231 °C

**<sup>1</sup>H NMR** (500 MHz, DMSO-*d*<sub>6</sub>) δ 14.00 (s, 1H), 11.60 (s, 1H), 11.40 (s, 1H), 8.45 (s, 1H), 8.05 (d, *J* = 2.1 Hz, 1H), 8.03 (d, *J* = 2.1 Hz, 1H), 7.73 (t, *J* = 8.2 Hz, 1H).

**<sup>13</sup>C NMR** (126 MHz, DMSO-*d*<sub>6</sub>) δ 150.2, 149.1, 143.4, 131.4, 123.3, 120.1, 119.9, 111.4, 56.4, 19.0.

**HRMS** (ESI) *m/z*: [M+H]<sup>+</sup> + calculated for C<sub>10</sub>H<sub>8</sub>N<sub>3</sub>O<sub>5</sub> 250.0463; found: 250.0455.

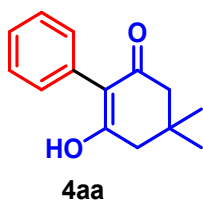

**6-hydroxy-4,4-dimethyl-4,5-dihydro-[1,1'-biphenyl]-2(3H)-one (4aa):** 90% yield. Shiny red solid. m.p: 239-240 °C

<sup>1</sup>H NMR (500 MHz, DMSO-d<sub>6</sub>) δ 14.89 (s, 1H), 7.61 (d, *J* = 9.5 Hz, 2H), 7.47 (t, *J* = 8.0 Hz, 2H), 7.27 (t, *J* = 7.4 Hz, 1H), 2.65 (s, 2H), 2.57 (s, 2H), 1.04 (s, 6H).

<sup>13</sup>C NMR (126 MHz, DMSO-d<sub>6</sub>) δ 197.3, 193.1, 141.9, 130.5, 130.1, 126.9, 117.5, 52.4, 52.1, 30.7, 28.4.

HRMS (ESI) m/z: [M+H]<sup>+</sup> + calculated for C<sub>14</sub>H<sub>17</sub>O<sub>2</sub> 217.1228; found: 217.1229.

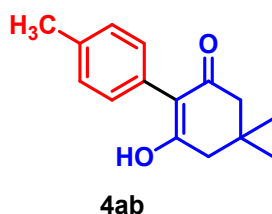

**6-hydroxy-4,4,4'-trimethyl-4,5-dihydro-[1,1'-biphenyl]-2(3H)-one (4ab):** 89% yield. Yellow solid. m.p: 219-220 °C

<sup>1</sup>H NMR (500 MHz, DMSO-d<sub>6</sub>) δ 15.00 (s, 1H), 7.50 (d, *J* = 8.5 Hz, 2H), 7.28 (d, *J* = 8.3 Hz, 2H), 2.63 (s, 2H), 2.55 (s, 2H), 2.32 (s, 3H), 1.03 (s, 6H).

<sup>13</sup>C NMR (126 MHz, DMSO-d<sub>6</sub>) δ 197.2, 193.1, 139.5, 136.7, 130.6, 130.2, 117.5, 52.4, 52.0, 30.7, 28.4, 21.0.

HRMS (ESI) m/z: [M+H]<sup>+</sup> + calculated for C<sub>15</sub>H<sub>19</sub>O<sub>2</sub> 231.1385; found: 231.1386.

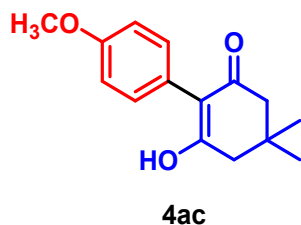

**6-hydroxy-4'-methoxy-4,4-dimethyl-4,5-dihydro-[1,1'-biphenyl]-2(3H)-one (4ac):** 92% yield. Brown solid. m.p: 246-247 °C

<sup>1</sup>H NMR (500 MHz, DMSO-d<sub>6</sub>) δ 15.15 (s, 1H), 7.58 (d, *J* = 9.0 Hz, 2H), 7.05 (d, *J* = 9.0 Hz, 2H), 3.79 (s, 3H), 2.61 (s, 2H), 2.53 (s, 2H), 1.03 (s, 6H).

$^{13}\text{C}$  NMR (126 MHz, DMSO- $d_6$ )  $\delta$  196.7, 192.9, 158.6, 135.2, 129.9, 119.1, 115.4, 55.9, 52.3, 51.9, 30.8, 28.4.

HRMS (ESI)  $m/z$ :  $[\text{M}+\text{H}]^+$  + calculated for  $\text{C}_{15}\text{H}_{19}\text{O}_3$  247.1334; found: 247.1322.

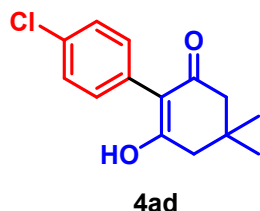

*4'-chloro-6-hydroxy-4,4-dimethyl-4,5-dihydro-[1,1'-biphenyl]-2(3H)-one (4ad)*: 88% yield.

Yellow solid. m.p: 248 °C

$^1\text{H}$  NMR (500 MHz, DMSO- $d_6$ )  $\delta$  14.73 (s, 1H), 7.65 (d,  $J$  = 8.9 Hz, 2H), 7.52 (d,  $J$  = 8.9 Hz, 2H), 2.65 (s, 2H), 2.57 (s, 2H), 1.04 (s, 6H).

$^{13}\text{C}$  NMR (126 MHz, DMSO- $d_6$ )  $\delta$  197.3, 193.2, 144.5, 144.3, 141.0, 130.0, 126.8, 119.2, 52.4, 52.2, 30.7, 28.4.

HRMS (ESI)  $m/z$ :  $[\text{M}+\text{H}]^+$  + calculated for  $\text{C}_{14}\text{H}_{16}\text{ClO}_2$  251.0838; found: 251.0838.

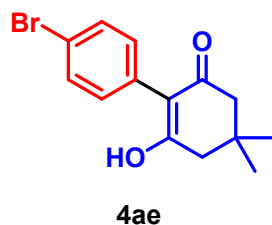

*4'-bromo-6-hydroxy-4,4-dimethyl-4,5-dihydro-[1,1'-biphenyl]-2(3H)-one (4ae)*: 83% yield.

Yellow solid. m.p: 219 °C

$^1\text{H}$  NMR (500 MHz, DMSO- $d_6$ )  $\delta$  14.73 (s, 1H), 7.65 (d,  $J$  = 8.9 Hz, 2H), 7.52 (d,  $J$  = 8.9 Hz, 2H), 2.65 (s, 2H), 2.57 (s, 2H), 1.04 (s, 6H).

$^{13}\text{C}$  NMR (126 MHz, DMSO- $d_6$ )  $\delta$  197.3, 193.2, 144.5, 144.3, 141.0, 130.0, 126.8, 119.2, 52.4, 52.2, 30.7, 28.4.

HRMS (ESI)  $m/z$ :  $[\text{M}+\text{H}]^+$  + calculated for  $\text{C}_{14}\text{H}_{16}\text{BrO}_2$  295.0333; found: 295.0334.

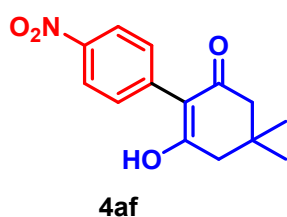

**6-hydroxy-4,4-dimethyl-4'-nitro-4,5-dihydro-[1,1'-biphenyl]-2(3H)-one(4af):** 79% yield.  
reddish solid. m.p: 247-248 °C

**<sup>1</sup>H NMR** (500 MHz, DMSO-d<sub>6</sub>) δ 14.49 (s, 1H), 8.32 (d, *J* = 9.2 Hz, 2H), 7.83 (d, *J* = 9.2 Hz, 2H), 2.71 (s, 2H), 2.63 (s, 2H), 1.05 (s, 6H).

**<sup>13</sup>C NMR** (126 MHz, DMSO-d<sub>6</sub>) δ 197.8, 193.5, 147.6, 146.2, 144.6, 132.2, 126.1, 126.0, 52.5, 52.4, 30.6, 28.4.

**HRMS** (ESI) *m/z*: [M+H]<sup>+</sup> + calculated for C<sub>14</sub>H<sub>16</sub>NO<sub>4</sub> 262.1079; found: 262.1078.

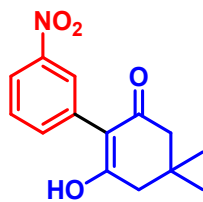

**4ag**

**6-hydroxy-4,4-dimethyl-3'-nitro-4,5-dihydro-[1,1'-biphenyl]-2(3H)-one(4ag):** 77% yield.  
black solid. m.p: 219°C

**<sup>1</sup>H NMR** (500 MHz, DMSO-d<sub>6</sub>) δ 14.57 (s, 1H), 8.48 (s, 1H), 8.07 (d, *J* = 2.2 Hz, 1H), 8.05 (d, *J* = 2.2 Hz, 1H), 7.73 (t, *J* = 8.2 Hz, 1H), 2.69 (s, 2H), 2.62 (s, 2H), 1.05 (s, 6H).

**<sup>13</sup>C NMR** (126 MHz, DMSO-d<sub>6</sub>) δ 197.4, 193.4, 149.1, 143.6, 131.4, 123.8, 120.5, 111.9, 52.5, 52.3, 30.6, 28.4.

**HRMS** (ESI) *m/z*: [M+H]<sup>+</sup> + calculated for C<sub>14</sub>H<sub>16</sub>NO<sub>4</sub> 262.1079; found: 262.1080.

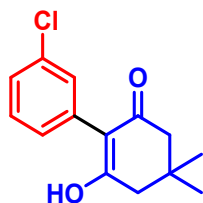

**4ah**

**3'-chloro-6-hydroxy-4,4-dimethyl-4,5-dihydro-[1,1'-biphenyl]-2(3H)-one(4ah):** 82% yellow solid. yield. m.p: 245-246 °C

**<sup>1</sup>H NMR** (500 MHz, DMSO-d<sub>6</sub>) δ 14.60 (s, 1H), 7.70 (s, 1H), 7.60 – 7.57 (m, 1H), 7.46 (d, *J* = 7.5 Hz, 1H), 7.29 (d, *J* = 7.9 Hz, 1H), 2.66 (s, 2H), 2.58 (s, 2H), 1.04 (s, 6H).

**<sup>13</sup>C NMR** (126 MHz, DMSO-d<sub>6</sub>) δ 197.4, 193.2, 143.6, 134.5, 134.3, 131.7, 131.0, 126.1, 117.0, 116.2, 52.4, 52.2, 30.6, 28.4.

**HRMS** (ESI) *m/z*: [M+H]<sup>+</sup> + calculated for C<sub>14</sub>H<sub>16</sub>ClO<sub>2</sub> 251.0838; found: 251.0839.

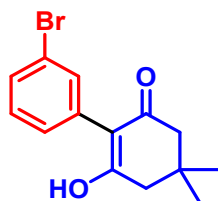

**4ai**

**3'-bromo-6-hydroxy-4,4-dimethyl-4,5-dihydro-[1,1'-biphenyl]-2(3H)-one(4ai):** 78% yield. yellow solid. m.p: 227-228 °C

**<sup>1</sup>H NMR** (500 MHz, DMSO-*d*<sub>6</sub>) δ 14.60 (s, 1H), 7.70 (s, 1H), 7.58 (d, *J* = 9.5 Hz, 1H), 7.47 (t, *J* = 8.1 Hz, 1H), 7.29 (d, *J* = 7.9 Hz, 1H), 2.66 (s, 2H), 2.58 (s, 2H), 1.04 (s, 6H).

**<sup>13</sup>C NMR** (126 MHz, DMSO-*d*<sub>6</sub>) δ 197.4, 193.2, 143.6, 134.5, 134.3, 131.7, 131.0, 126.1, 117.0, 116.2, 52.4, 52.2, 30.6, 28.4.

**HRMS** (ESI) *m/z*: [M+H]<sup>+</sup> + calculated for C<sub>14</sub>H<sub>16</sub>BrO<sub>2</sub> 295.0333; found: 295.0335.

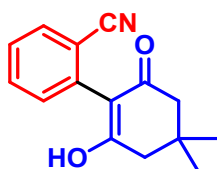

**4aj**

**6'-hydroxy-4',4'-dimethyl-2'-oxo-2',3',4',5'-tetrahydro-[1,1'-biphenyl]-2-carbonitrile(4aj):**

76% yield. reddish solid. m.p: 229 °C

**<sup>1</sup>H NMR** (500 MHz, DMSO-*d*<sub>6</sub>) δ 15.20 (s, 1H), 7.90 (dd, *J* = 13.2, 4.9 Hz, 2H), 7.82 (t, *J* = 7.9 Hz, 1H), 7.39 (t, *J* = 7.1 Hz, 1H), 2.73 (s, 2H), 2.63 (s, 2H), 1.06 (s, 6H).

**<sup>13</sup>C NMR** (126 MHz, DMSO-*d*<sub>6</sub>) δ 198.8, 193.2, 144.4, 135.5, 133.7, 132.3, 126.4, 116.4, 100.4, 52.4, 52.2, 30.6, 28.4.

**HRMS** (ESI) *m/z*: [M+H]<sup>+</sup> + calculated for C<sub>15</sub>H<sub>16</sub>NO<sub>2</sub> 242.1181; found: 242.1182.

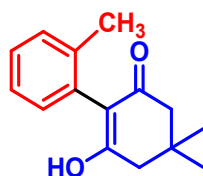

**4ak**

**6-hydroxy-2',4,4-trimethyl-4,5-dihydro-[1,1'-biphenyl]-2(3H)-one (4ak):** 78% yield. Black solid. m.p: 209 °C

$^1\text{H NMR}$  (500 MHz, DMSO- $d_6$ )  $\delta$  15.33 (s, 1H), 7.74 (d,  $J = 8.0$  Hz, 1H), 7.38 – 7.32 (m, 2H), 7.20 (t,  $J = 7.4$  Hz, 1H), 2.68 (s, 2H), 2.57 (s, 2H), 2.37 (s, 3H), 1.05 (s, 6H).

$^{13}\text{C NMR}$  (126 MHz, DMSO- $d_6$ )  $\delta$  197.8, 193.1, 139.7, 131.6, 131.3, 128.1, 126.8, 126.6, 115.5, 52.4, 52.0, 30.8, 28.4, 16.8.

HRMS (ESI)  $m/z$ :  $[\text{M}+\text{H}]^+$  + calculated for  $\text{C}_{15}\text{H}_{19}\text{O}_2$  231.1385; found: 231.1384.

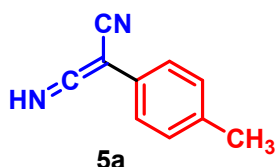

**3-imino-2-(*p*-tolyl) acrylonitrile (5a):** 88% yield. Shiny yellow solid. m.p: 156-157 °C

$^1\text{H NMR}$  (500 MHz, DMSO- $d_6$ ) 7.37 (d,  $J = 8.5$  Hz, 2H), 7.23 (d,  $J = 8.2$  Hz, 2H), 2.30 (s, 3H).

$^{13}\text{C NMR}$  (126 MHz, DMSO- $d_6$ )  $\delta$  139.6, 135.8, 130.4, 116.9, 114.9, 110.5, 84.2, 20.9.

HRMS (ESI)  $m/z$ :  $[\text{M}+\text{H}]^+$  + calculated for  $\text{C}_{10}\text{H}_9\text{N}_2$  157.0765; found: 157.0764

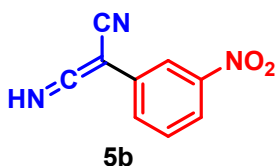

**3-imino-2-(3-nitrophenyl) acrylonitrile (5b):** 77% yield. Brown solid. m.p: 163 °C

$^1\text{H NMR}$  (500 MHz, DMSO- $d_6$ )  $\delta$  8.24 (s, 1H), 8.02 (dd,  $J = 8.1, 1.5$  Hz, 1H), 7.86 (dd,  $J = 8.2, 1.4$  Hz, 1H), 7.70 (t,  $J = 8.2$  Hz, 1H).

$^{13}\text{C NMR}$  (126 MHz, DMSO- $d_6$ )  $\delta$  148.9, 143.4, 131.5, 122.8, 120.1, 114.5, 111.5, 110.2, 87.2.

HRMS (ESI)  $m/z$ :  $[\text{M}+\text{H}]^+$  + calculated for  $\text{C}_9\text{H}_6\text{N}_3\text{O}_2$  188.0460; found: 188.0461.

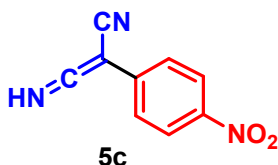

**3-imino-2-(4-nitrophenyl) acrylonitrile (5c):** 88% yield. Shiny orange solid. m.p: 159 °C

$^1\text{H NMR}$  (500 MHz, DMSO- $d_6$ )  $\delta$  8.28 (d,  $J = 9.3$  Hz, 2H), 7.64 (d,  $J = 9.3$  Hz, 2H).

$^{13}\text{C NMR}$  (126 MHz, DMSO- $d_6$ )  $\delta$  147.7, 144.3, 126.0, 117.2, 114.5, 110.1, 88.7.

HRMS (ESI)  $m/z$ :  $[M+H]^+$  + calculated for  $C_9H_6N_3O_2$  188.0460; found: 188.0462.

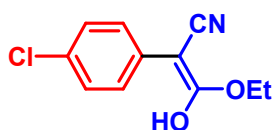

**6a**

**(Z)-2-(4-chlorophenyl)-3-ethoxy-3-hydroxyacrylonitrile (6a)**: 83% yield. Yellow solid. m.p: 161-162°C

$^1H$  NMR (500 MHz, DMSO- $d_6$ )  $\delta$  12.94 (s, 1H), 7.57 (d,  $J$  = 9.0 Hz, 2H), 7.47 (d,  $J$  = 7.5 Hz, 2H), 4.33 (q,  $J$  = 7.1 Hz, 2H), 1.32 (t,  $J$  = 7.1 Hz, 3H).

$^{13}C$  NMR (126 MHz, DMSO- $d_6$ )  $\delta$  160.8, 140.7, 129.8, 118.4, 118.1, 116.1, 105.4, 62.4, 14.3.

HRMS (ESI)  $m/z$ :  $[M+H]^+$  + calculated for  $C_{11}H_{11}ClNO_2$  224.0478; found: 224.0479.

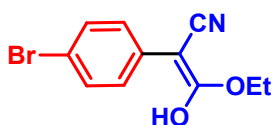

**6b**

**(Z)-2-(4-bromophenyl)-3-ethoxy-3-hydroxyacrylonitrile (6b)**: 78% yield. Yellow solid. m.p: 136 °C

$^1H$  NMR (500 MHz, DMSO- $d_6$ )  $\delta$  12.94 (s, 1H), 7.57 (d,  $J$  = 9.0 Hz, 2H), 7.47 (d,  $J$  = 7.5 Hz, 2H), 4.33 (q,  $J$  = 7.1 Hz, 2H), 1.32 (t,  $J$  = 7.1 Hz, 3H).

$^{13}C$  NMR (126 MHz, DMSO- $d_6$ )  $\delta$  160.8, 140.7, 129.8, 118.4, 118.1, 116.1, 105.4, 62.4, 14.3.

HRMS (ESI)  $m/z$ :  $[M+H]^+$  + calculated for  $C_{11}H_{11}BrNO_2$  267.9973; found: 267.9975.

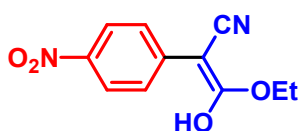

**6c**

**(Z)-3-ethoxy-3-hydroxy-2-(4-nitrophenyl) acrylonitrile (6c)**: 79% yield. Yellow solid. m.p: 146-147 °C

$^1H$  NMR (500 MHz, DMSO- $d_6$ )  $\delta$  12.59 (s, 1H), 8.31 (d,  $J$  = 9.3 Hz, 2H), 7.65 (d,  $J$  = 9.3 Hz, 2H), 4.33 (q,  $J$  = 7.1 Hz, 2H), 1.31 (t,  $J$  = 7.1 Hz, 3H).

$^{13}C$  NMR (126 MHz, DMSO- $d_6$ )  $\delta$  160.7, 147.0, 143.7, 126.0, 116.6, 111.3, 108.2, 62.4, 14.5.

HRMS (ESI)  $m/z$ :  $[M+H]^+$  + calculated for  $C_{11}H_{11}N_2O_4$  235.0718; found: 235.0719.

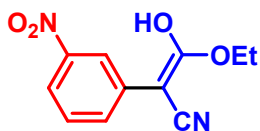

**6d**

*(Z)*-3-ethoxy-3-hydroxy-2-(3-nitrophenyl) acrylonitrile (**6d**): 76% yield. Yellow solid. m.p: 137-138 °C

<sup>1</sup>H NMR (500 MHz, DMSO-d<sub>6</sub>) δ 12.50 (s, 1H), 8.26 (s, 1H), 7.96 -7.93 (m, 1H), 7.84 -7.81 (m, 1H), 7.68 (t, *J* = 8.2 Hz, 1H), 4.32 (q, *J* = 7.1 Hz, 2H), 1.31 (t, *J* = 7.1 Hz, 3H).

<sup>13</sup>C NMR (126 MHz, DMSO-d<sub>6</sub>) δ 160.8, 148.9, 143.5, 131.4, 122.3, 119.2, 111.4, 110.9, 106.5, 62.3, 14.5.

HRMS (ESI) *m/z*: [M+H]<sup>+</sup> calculated for C<sub>11</sub>H<sub>10</sub>N<sub>2</sub>O<sub>4</sub> 234.0640; found: 234.0641.

## 5. Copies of NMR spectra

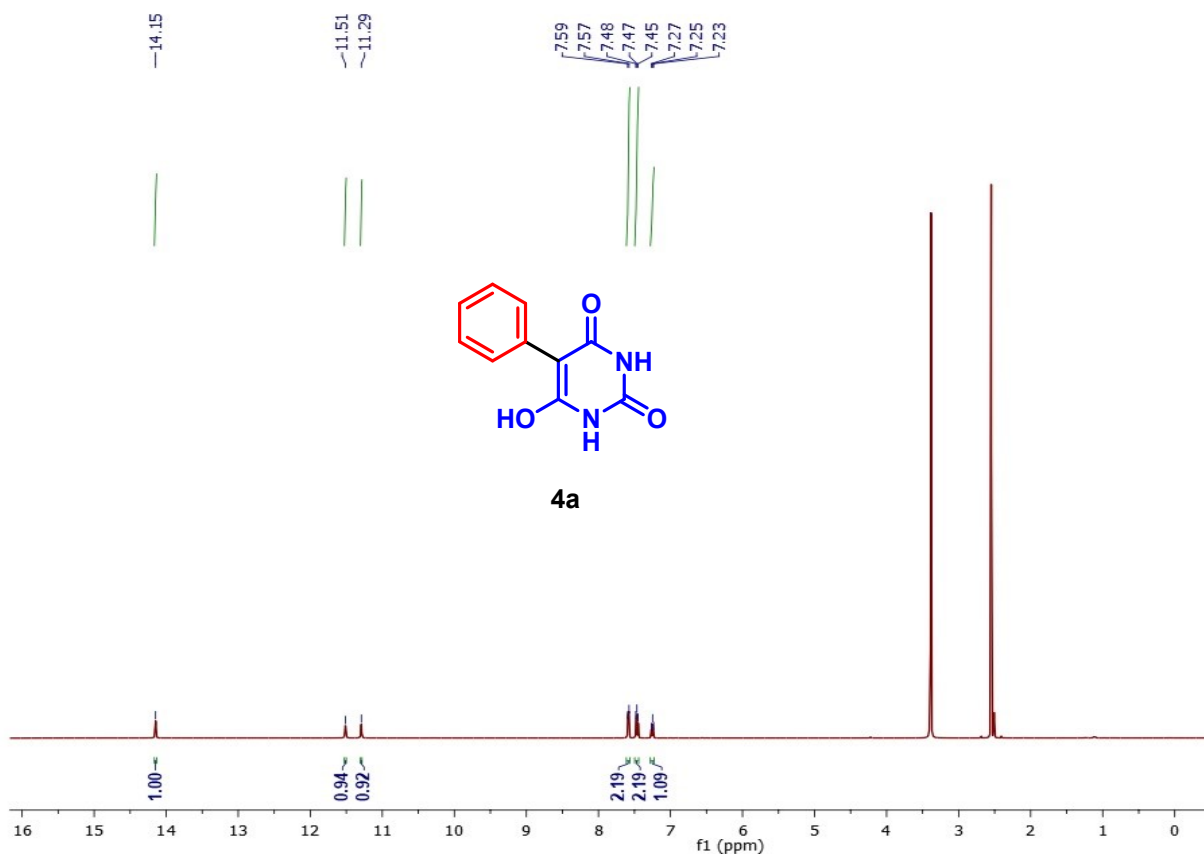



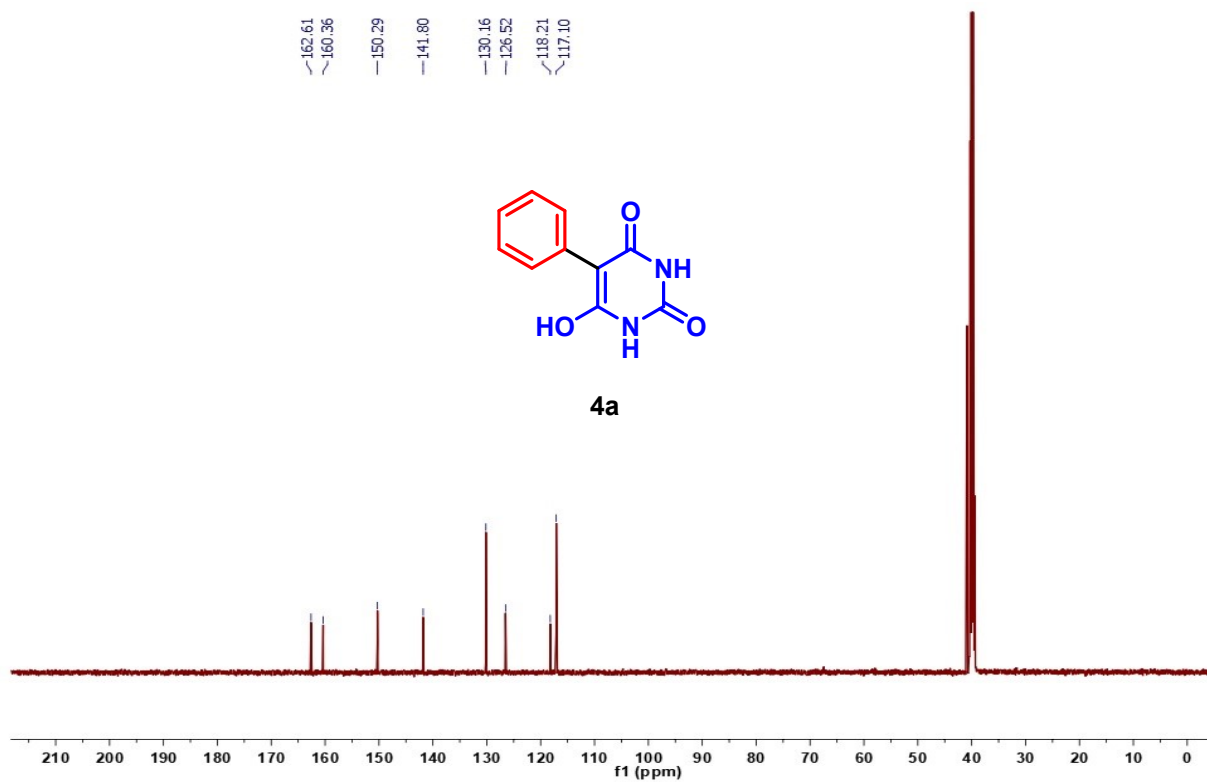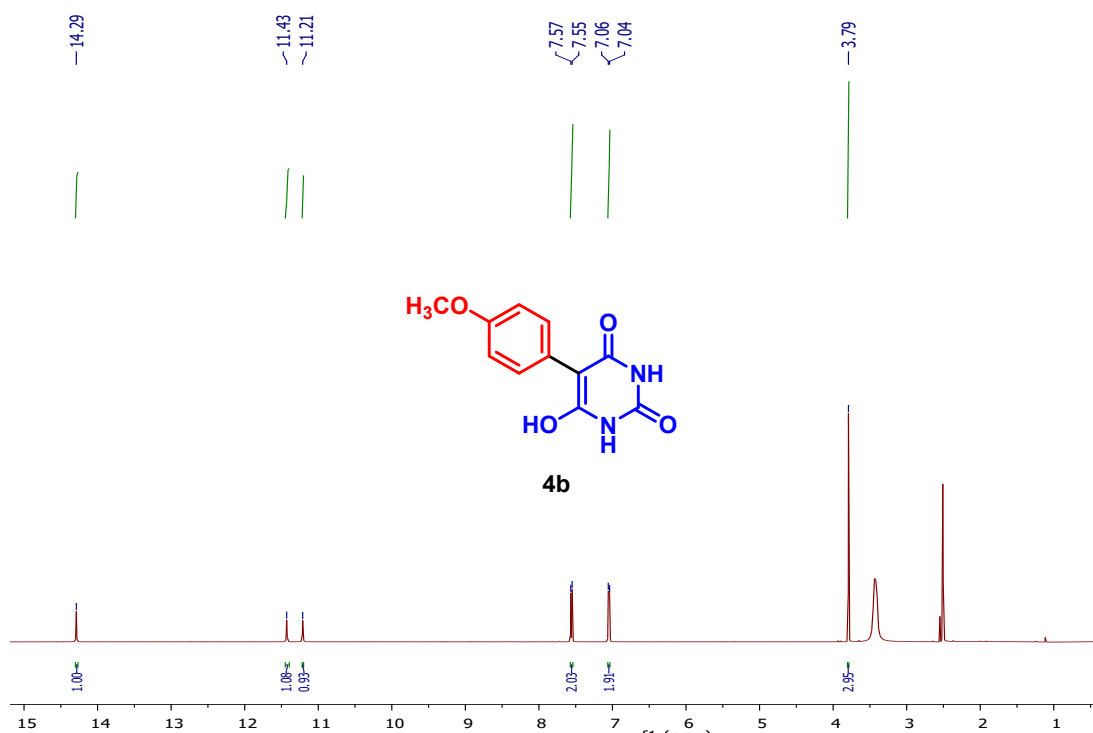

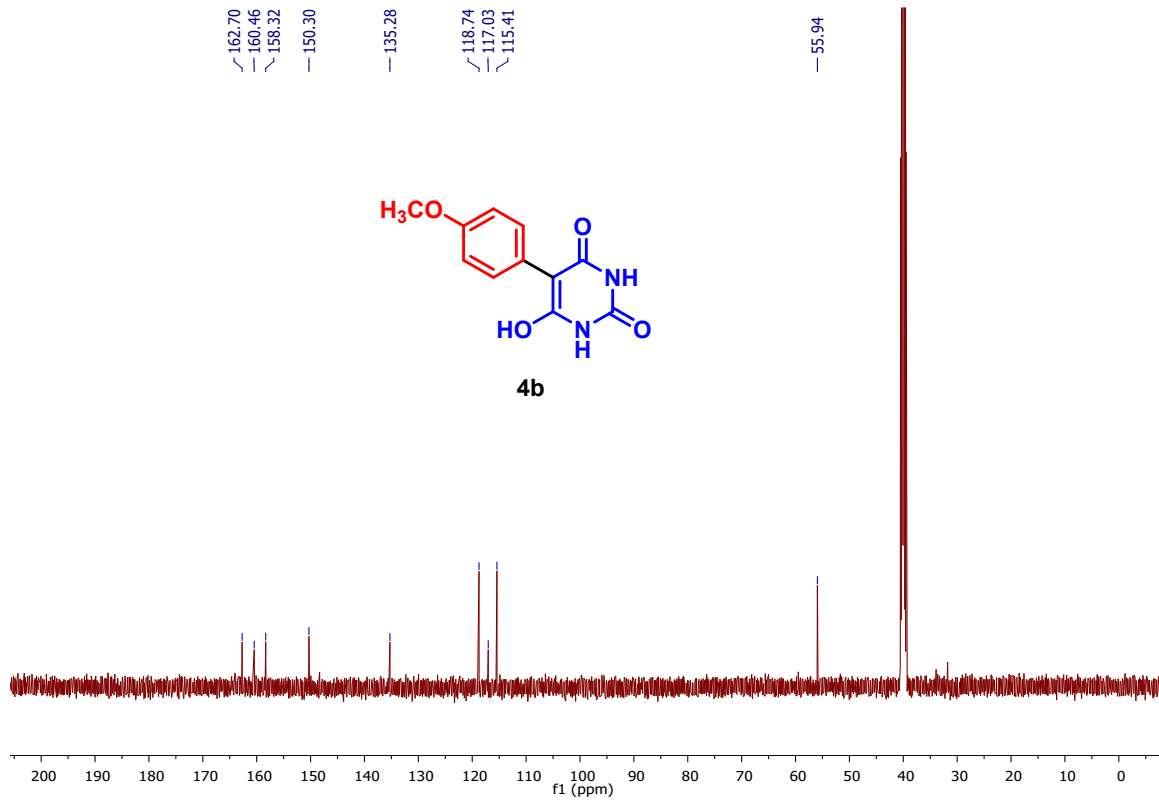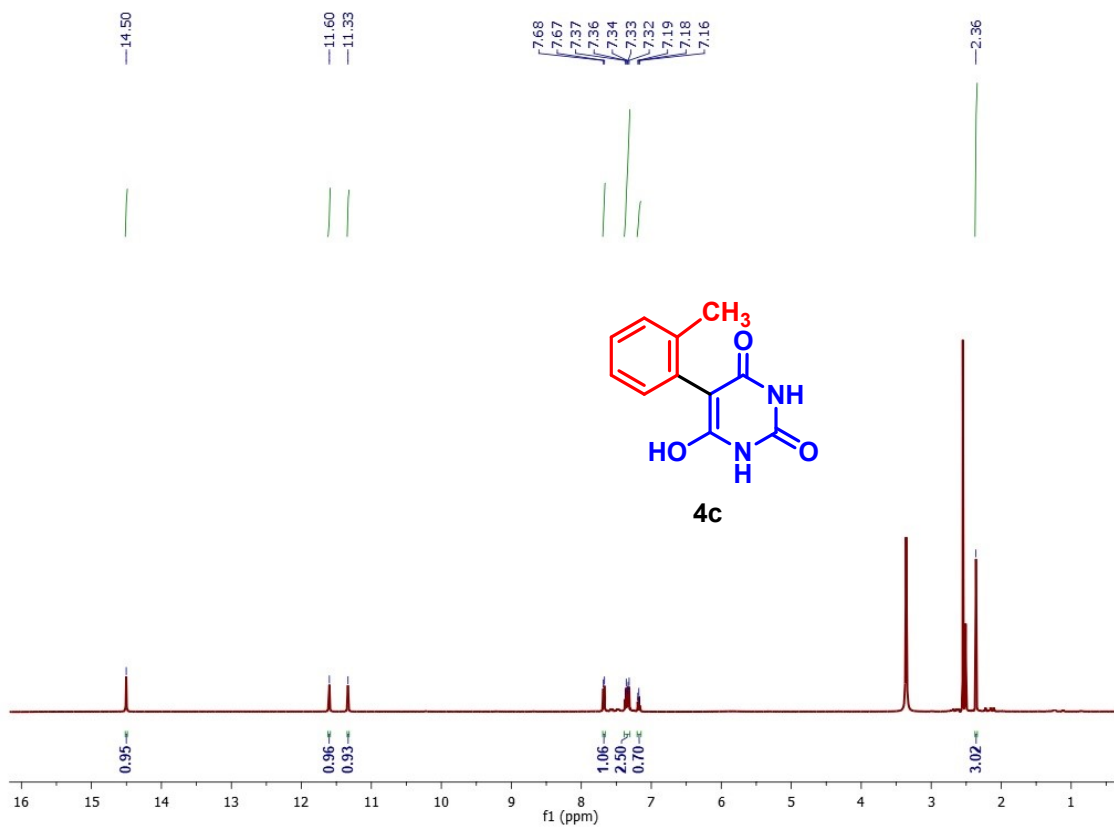

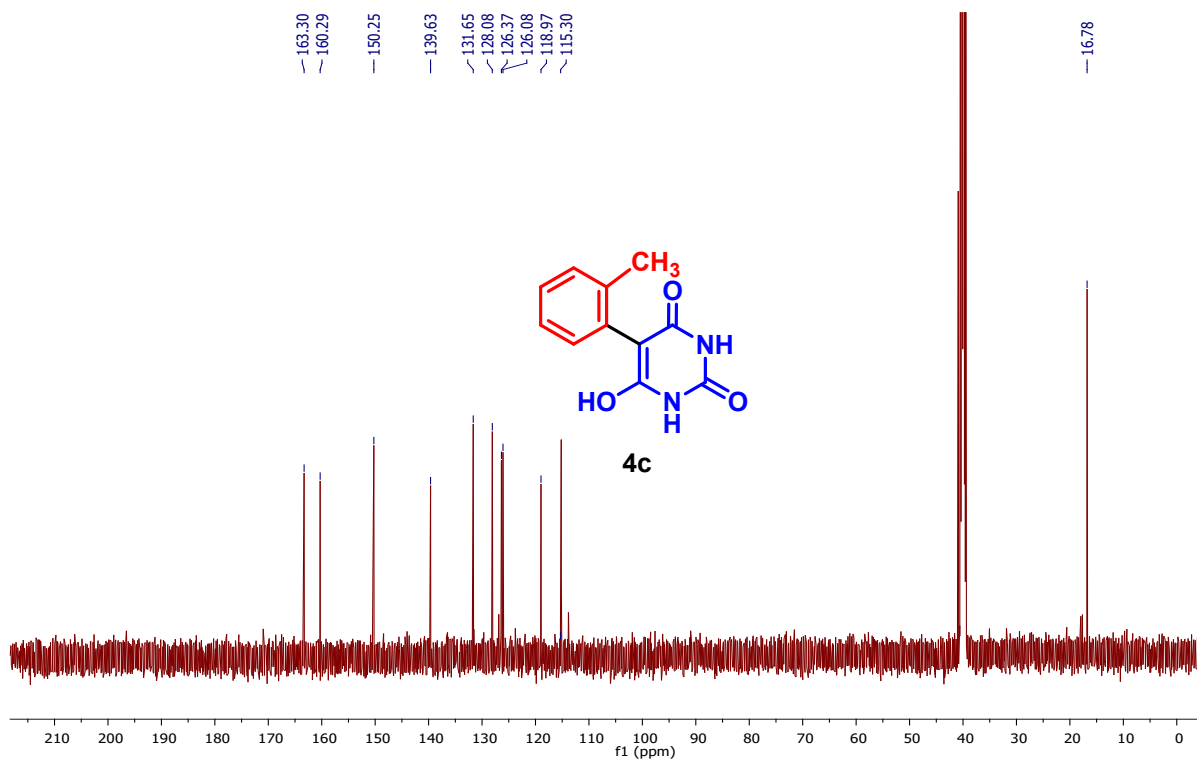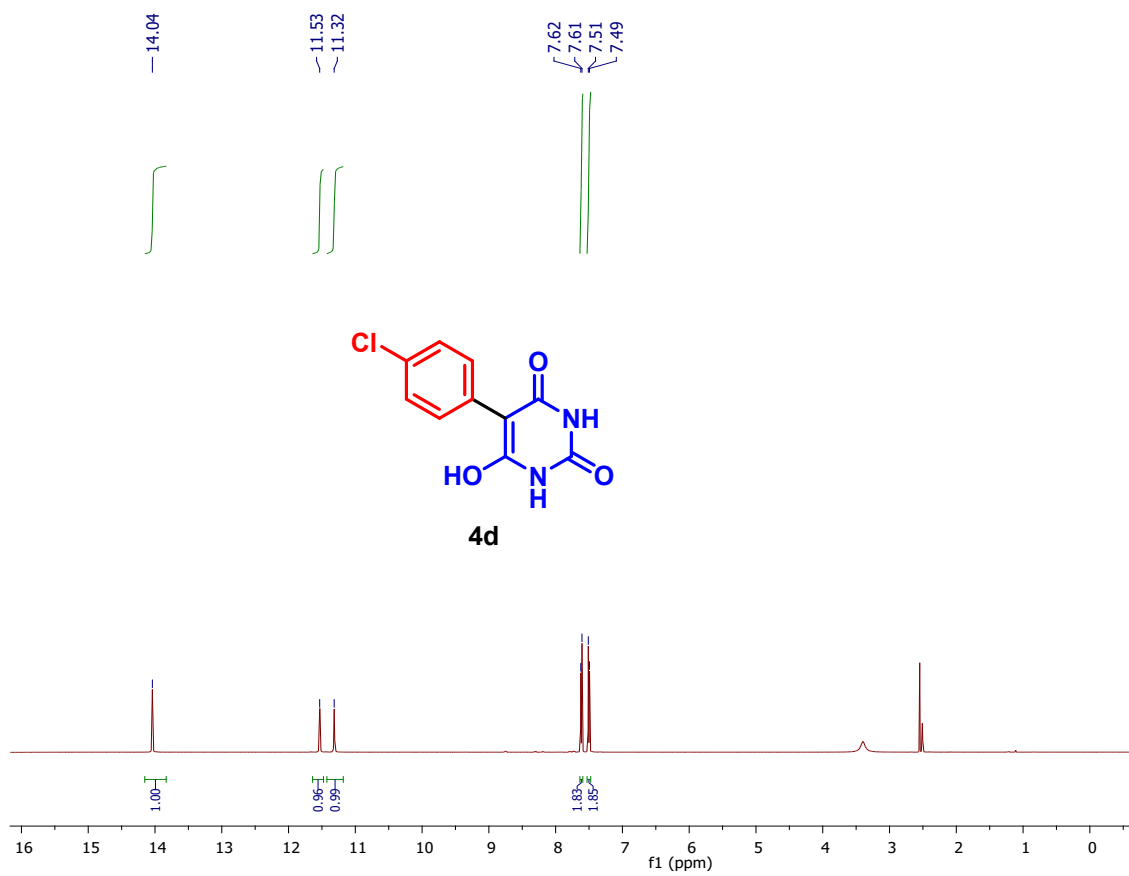

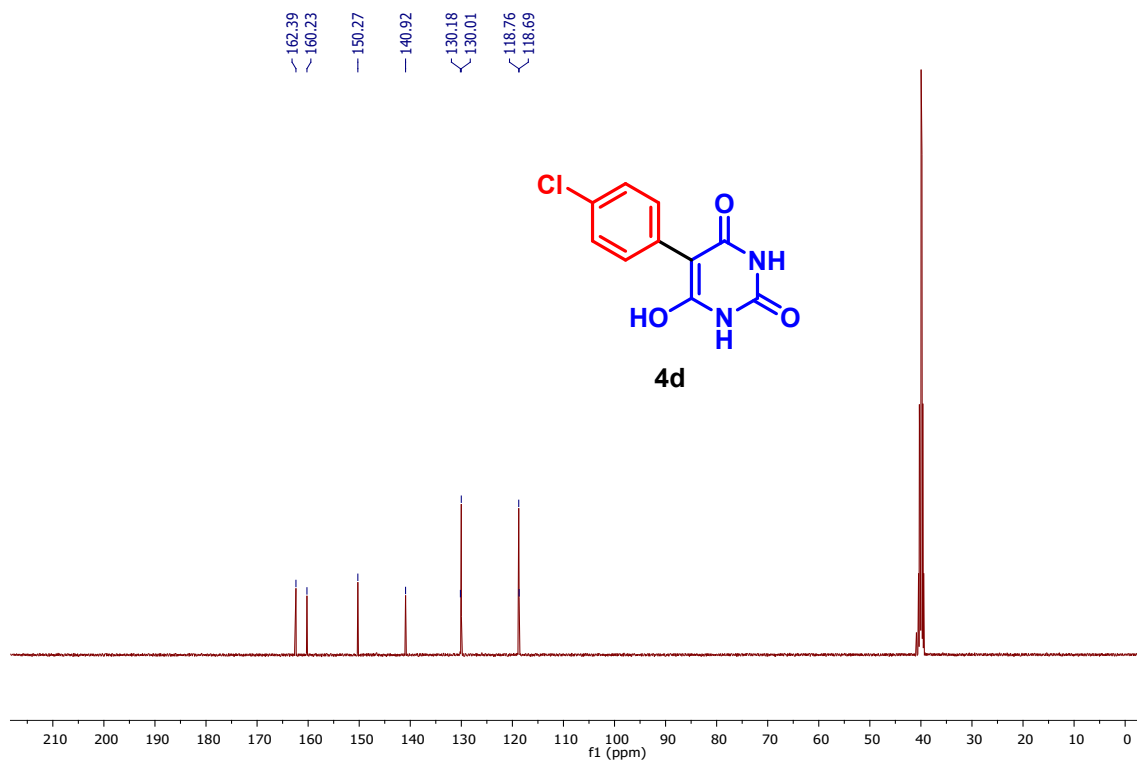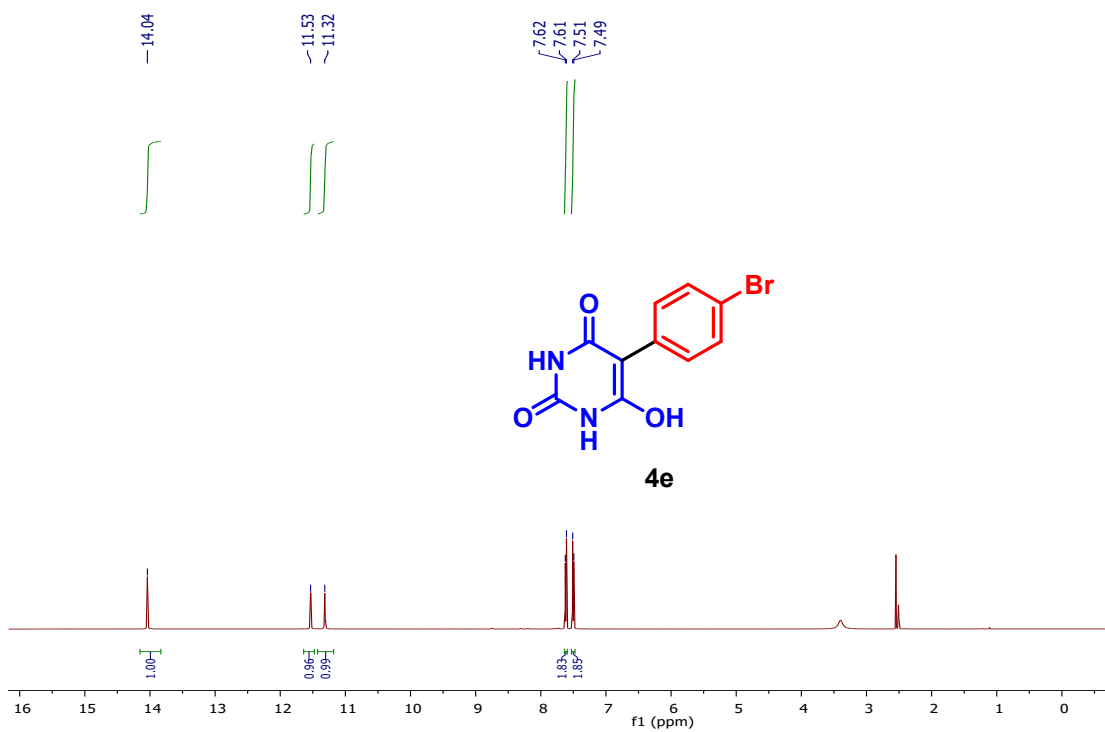

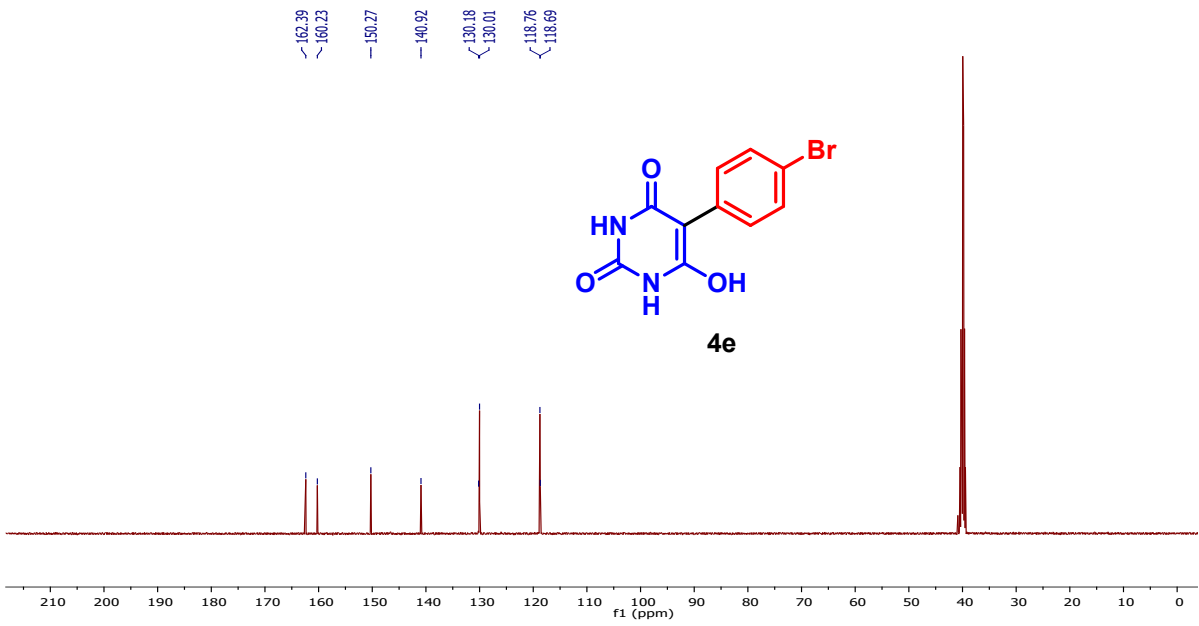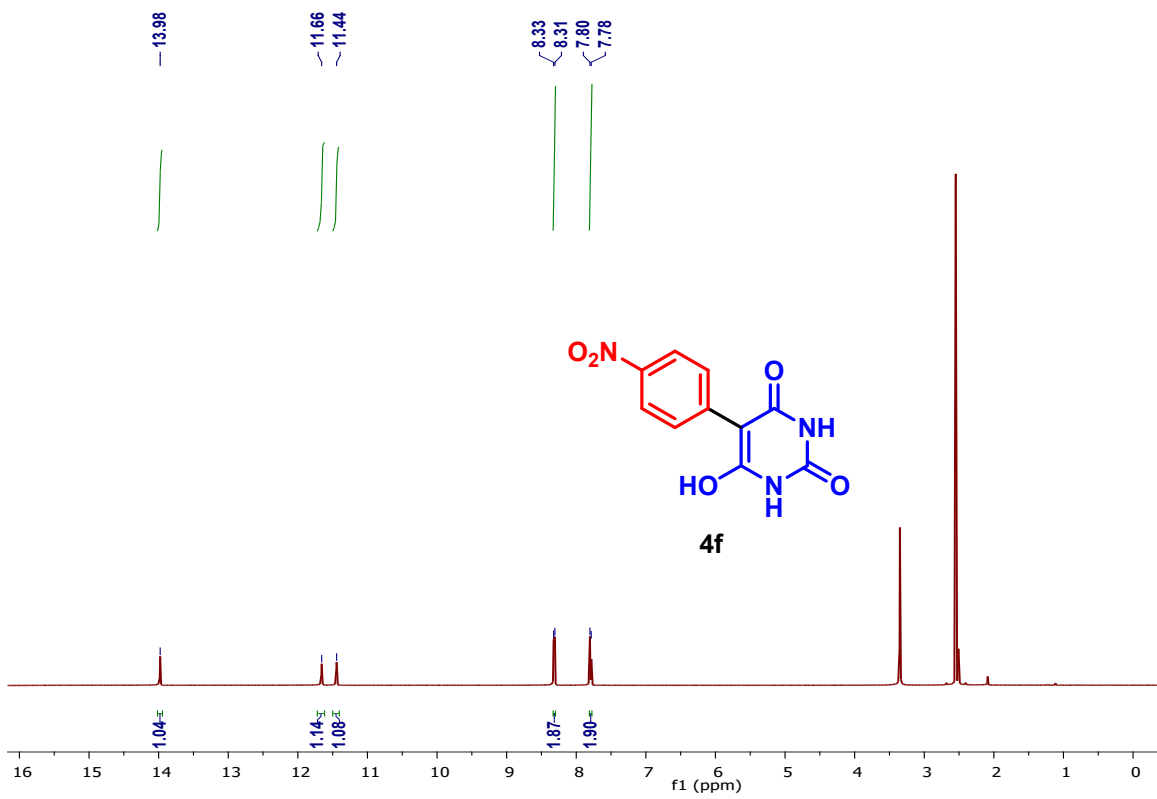

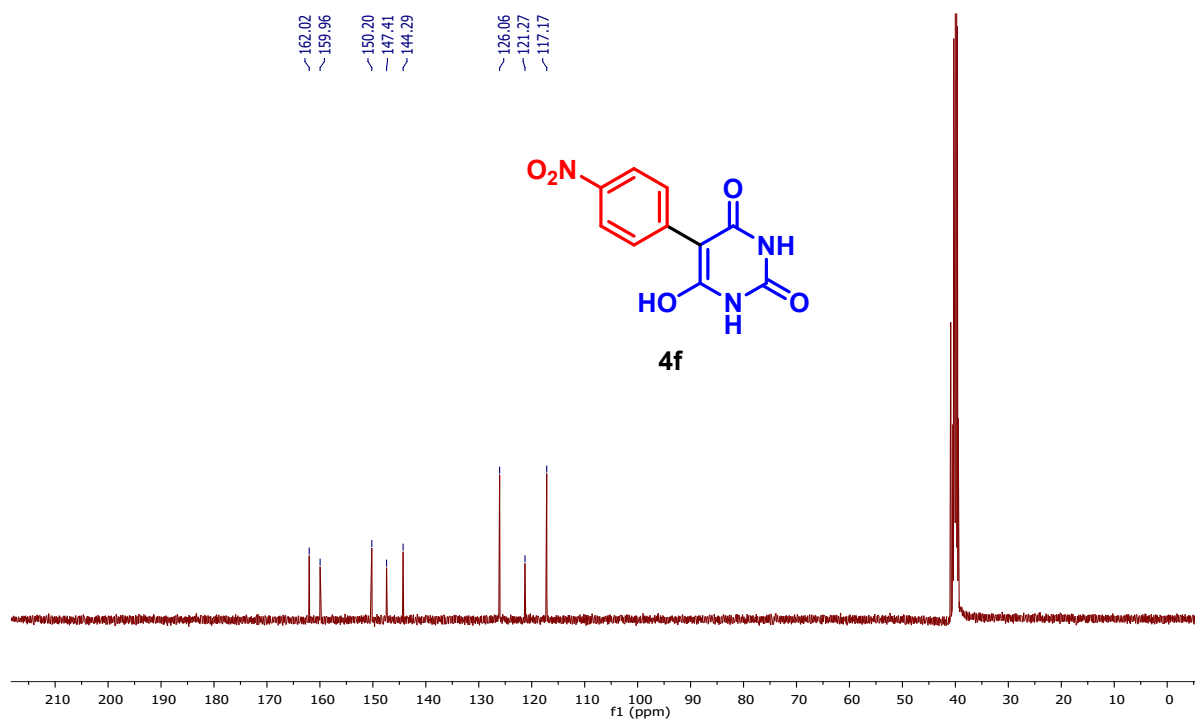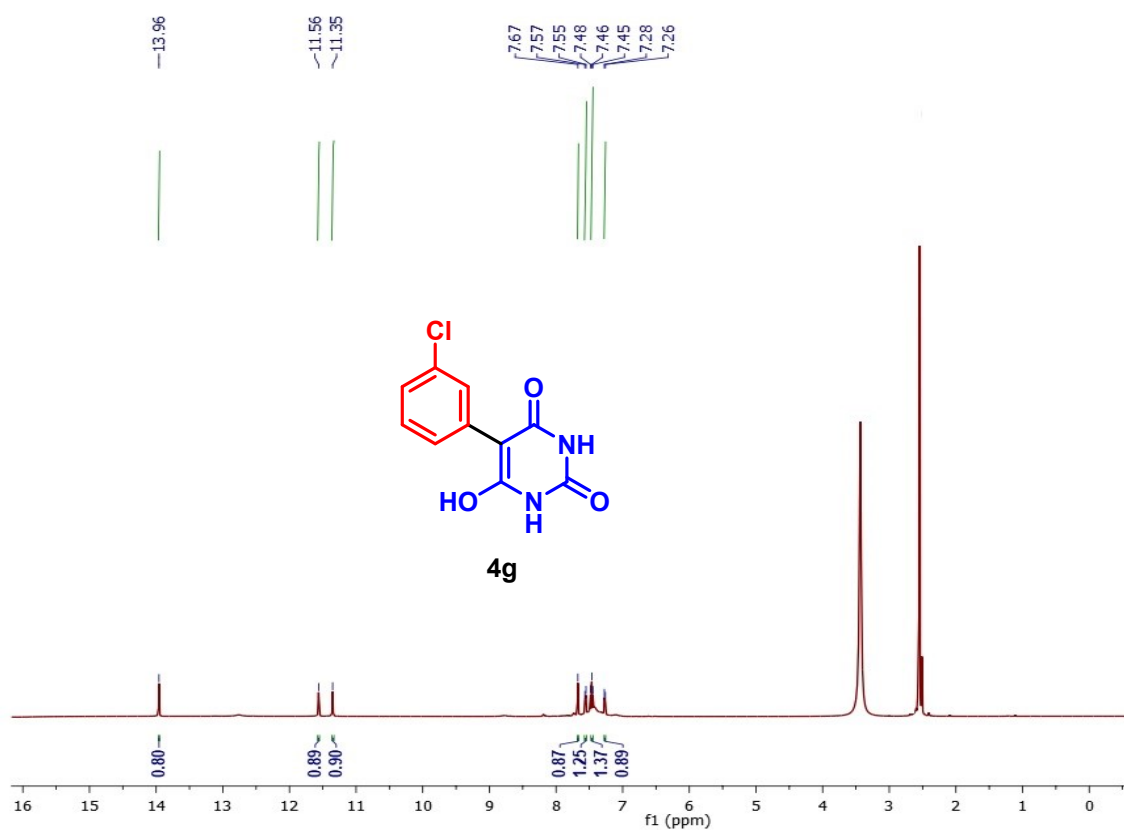

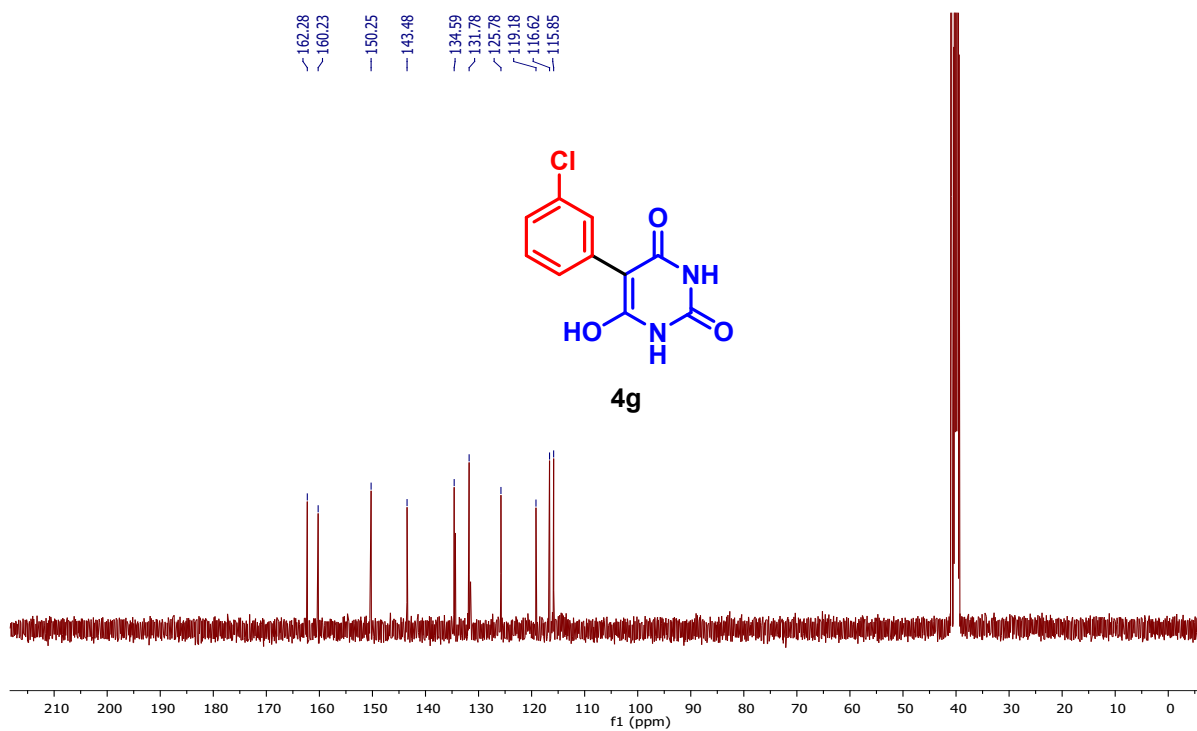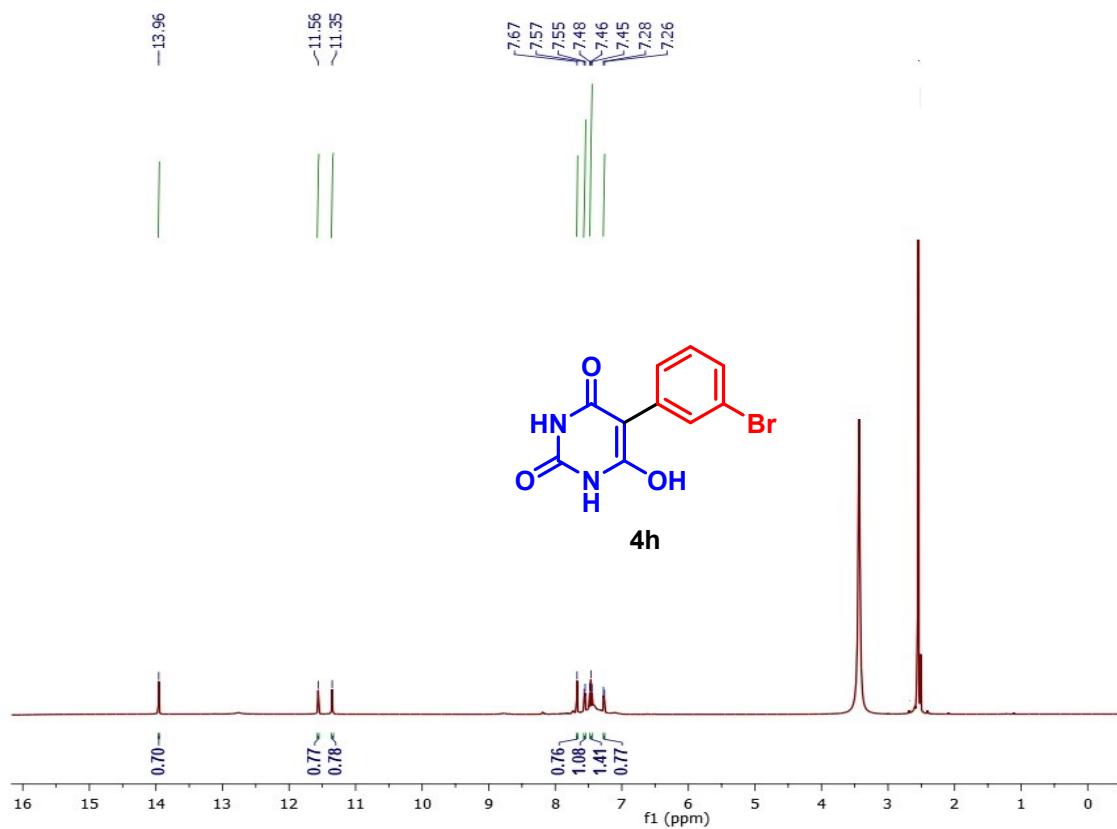

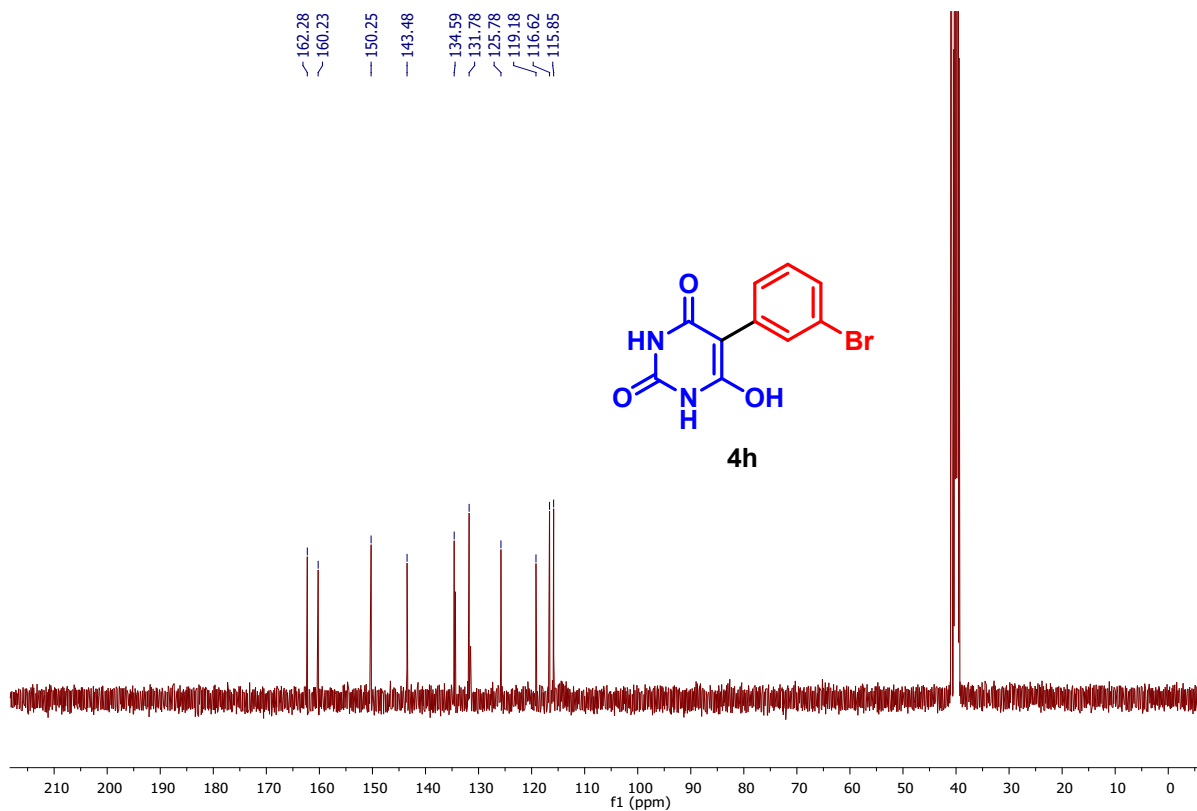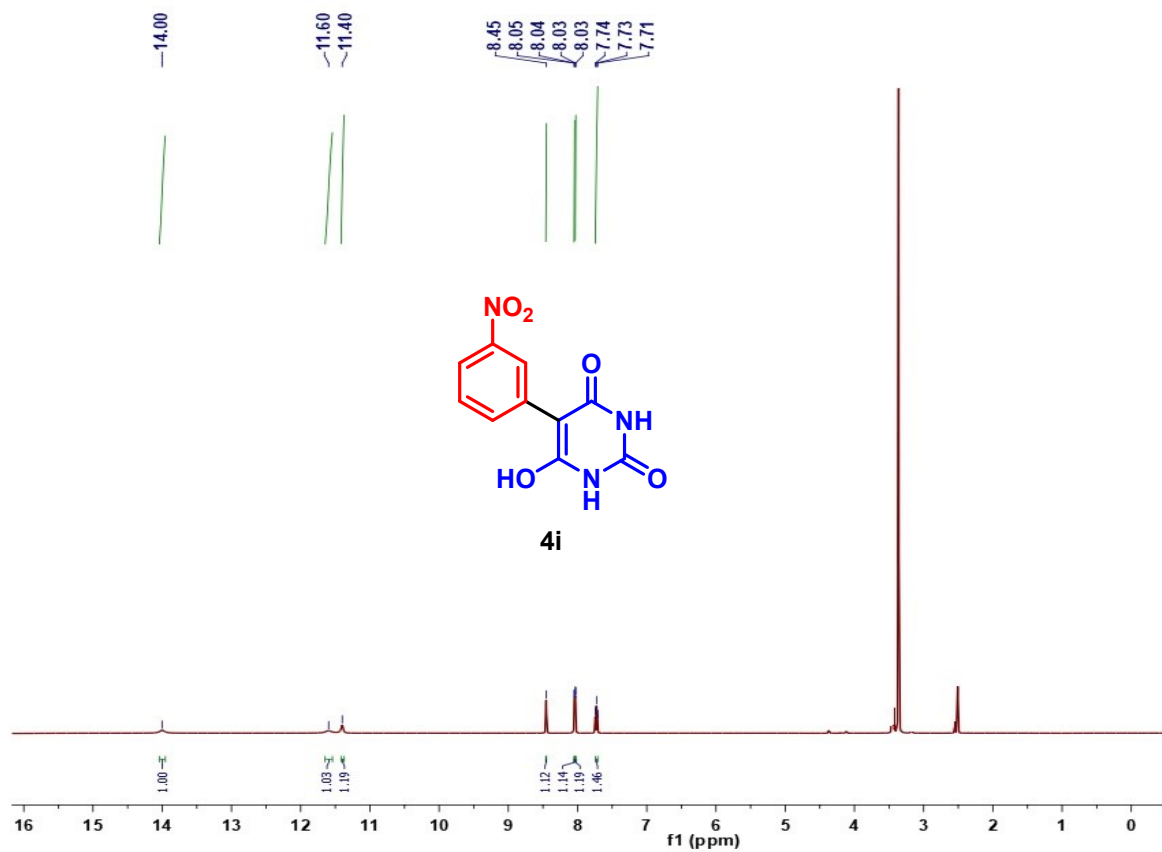



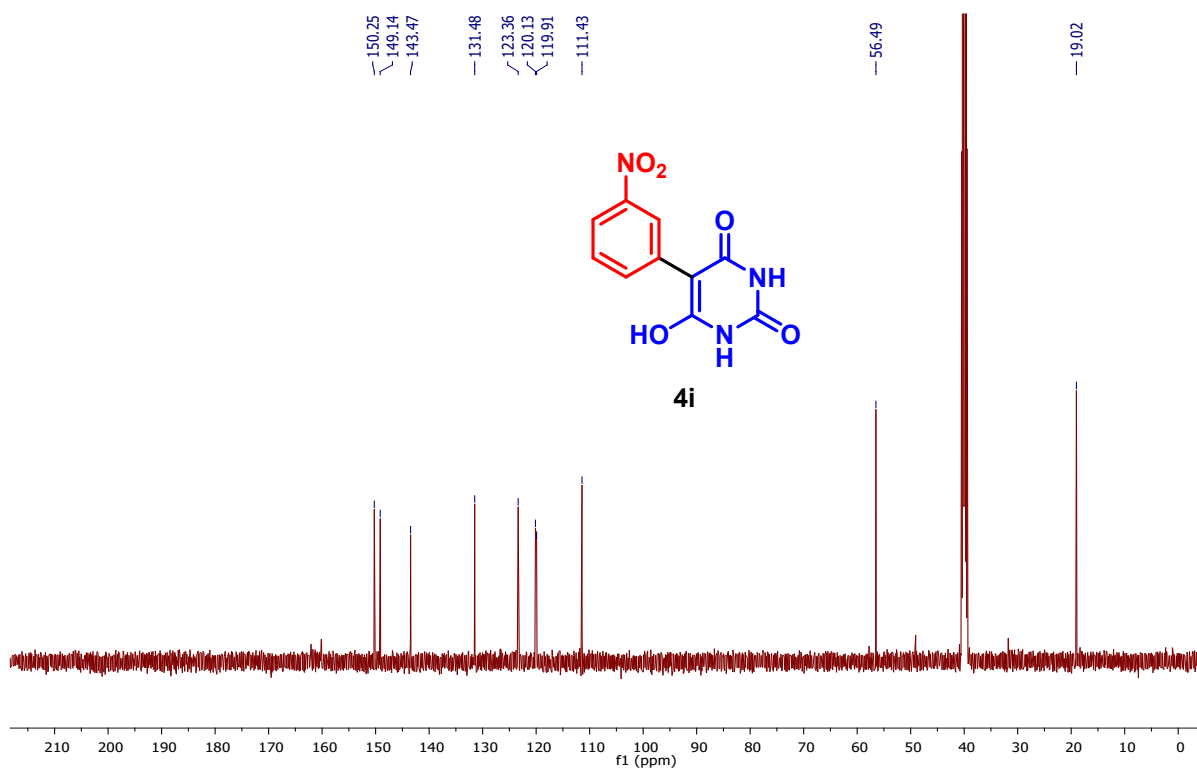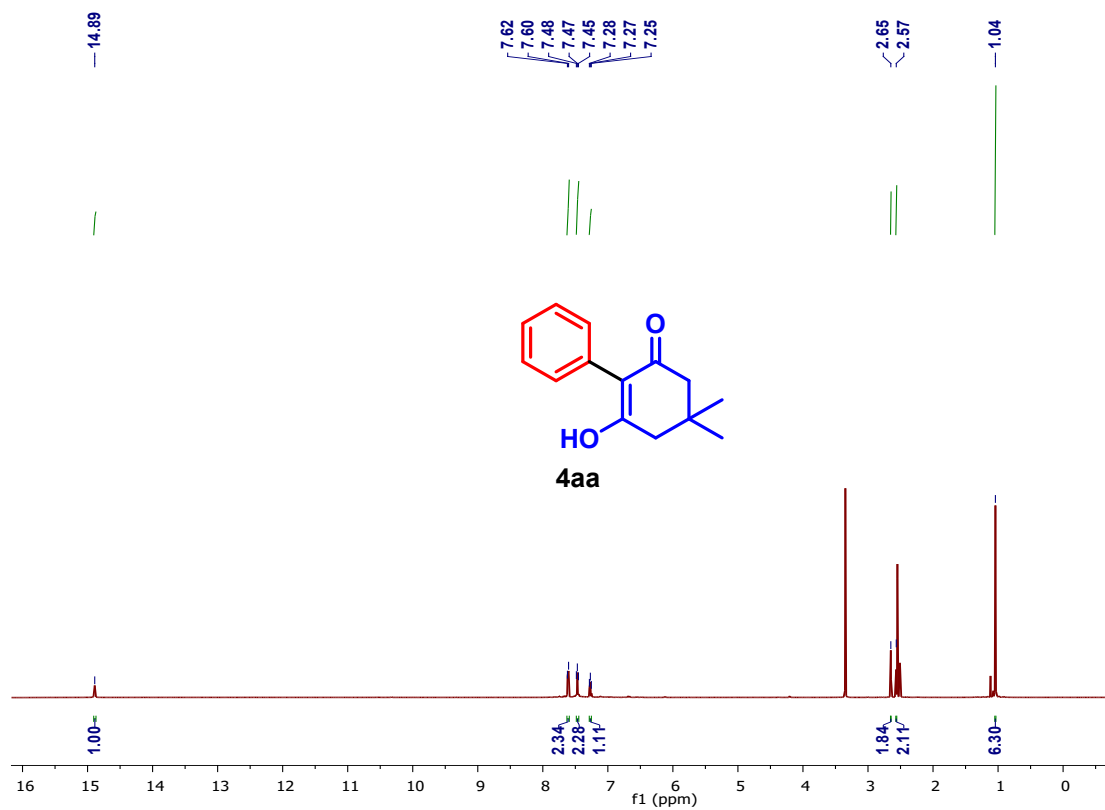

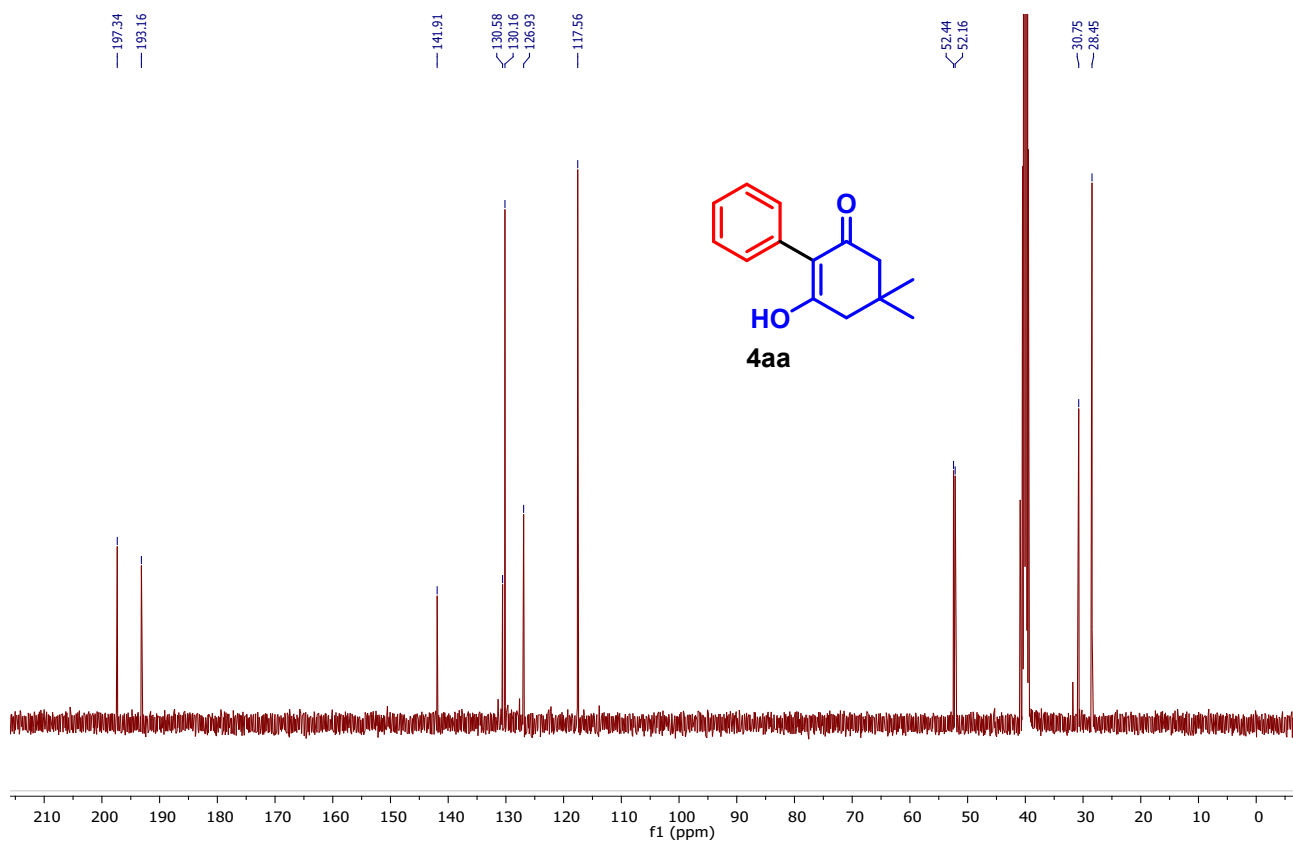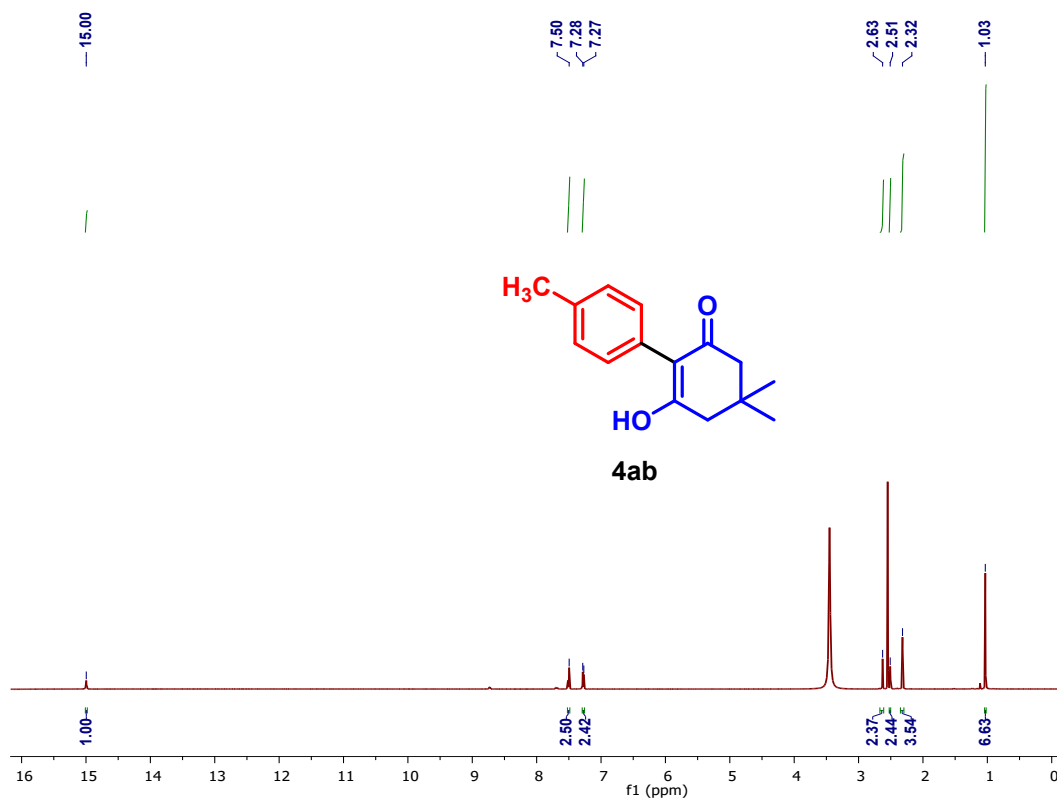

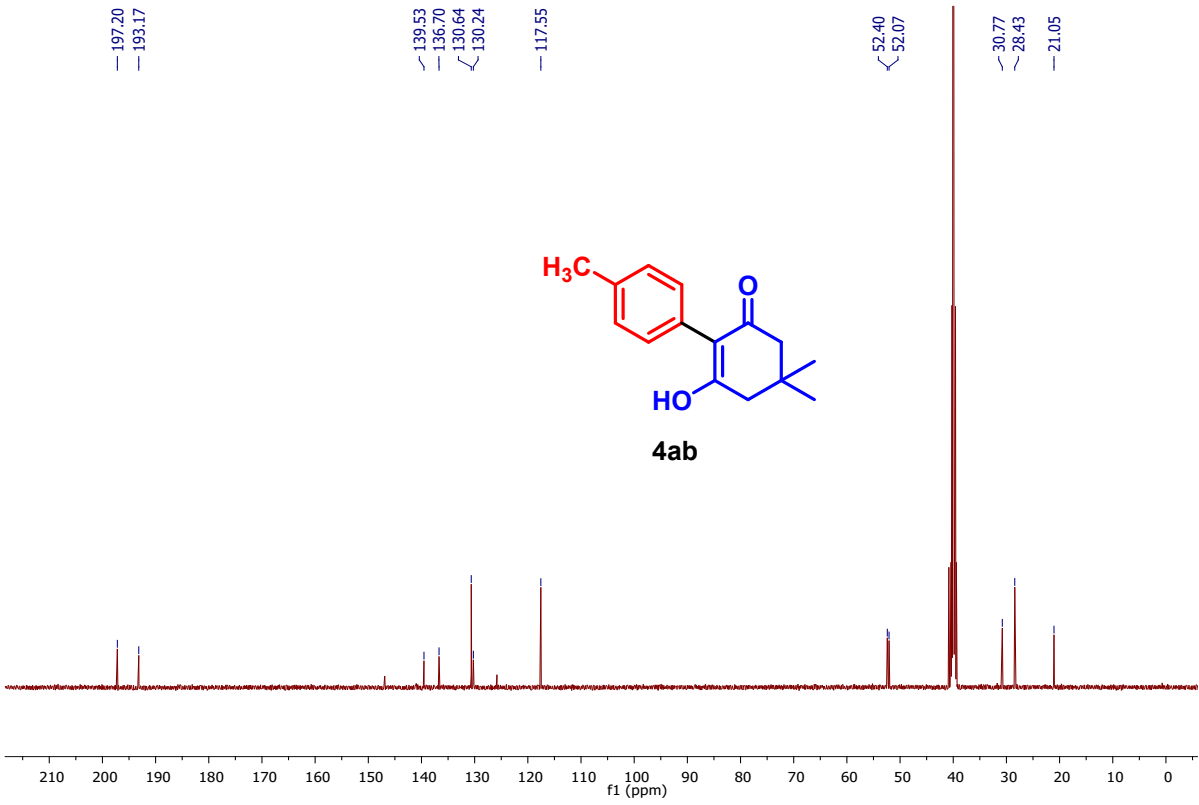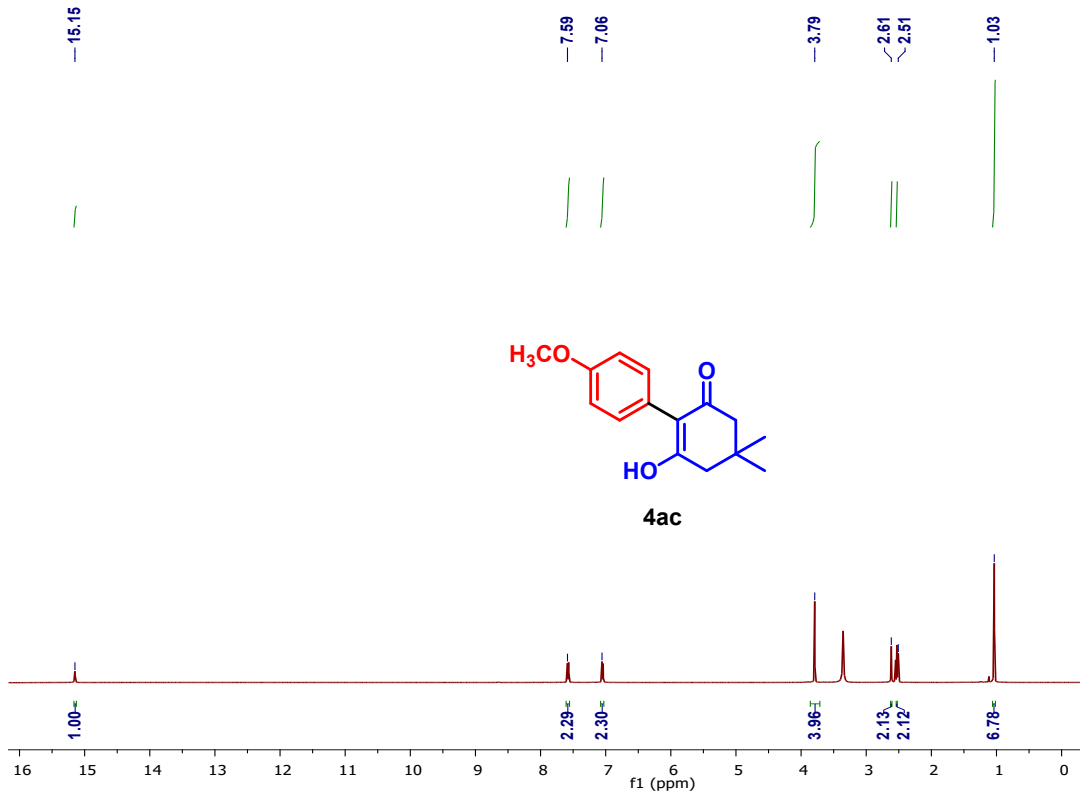

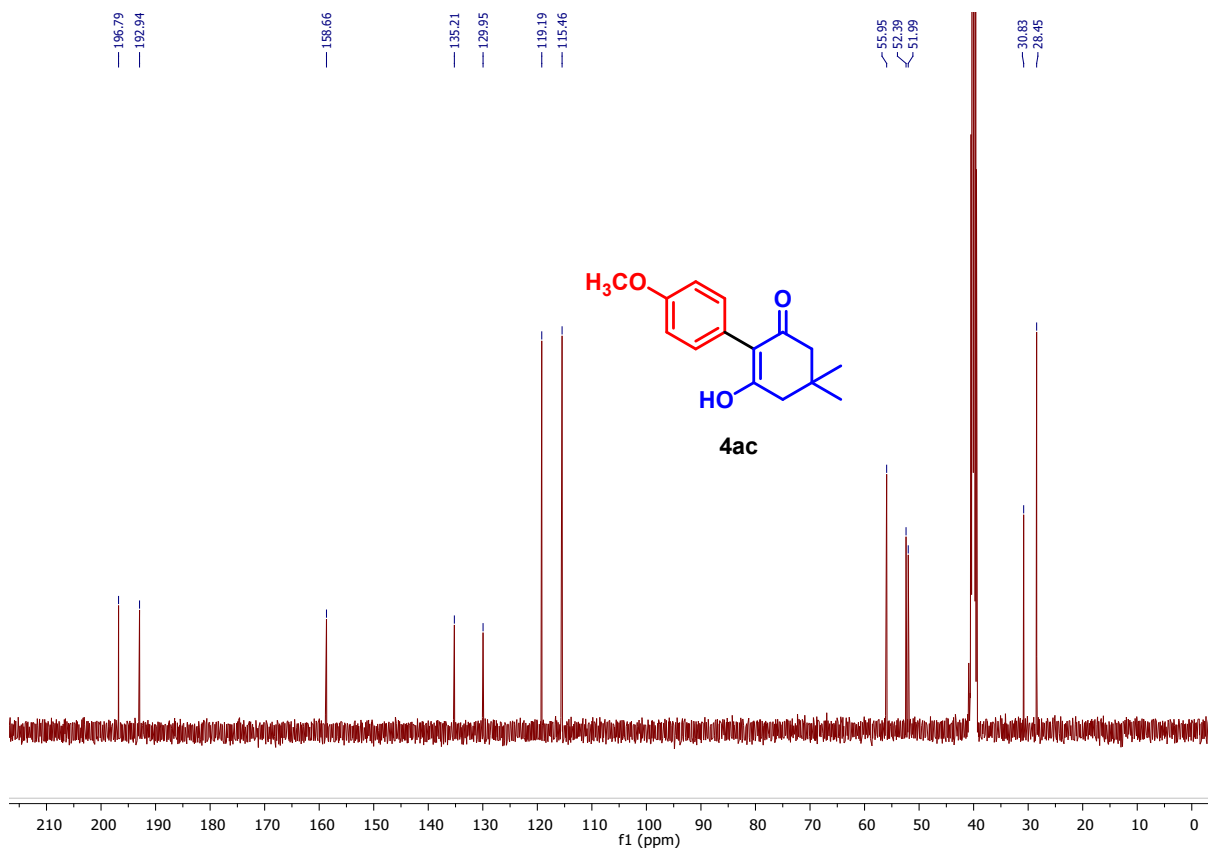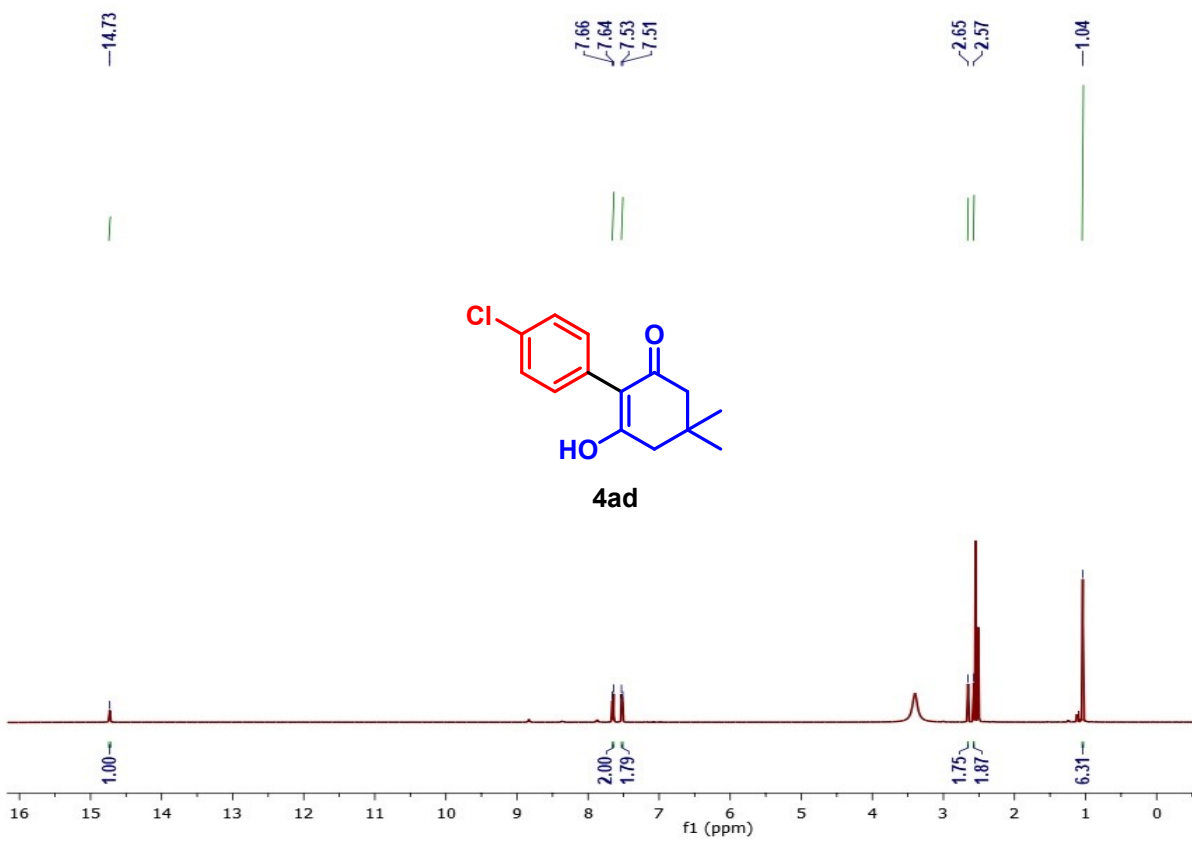

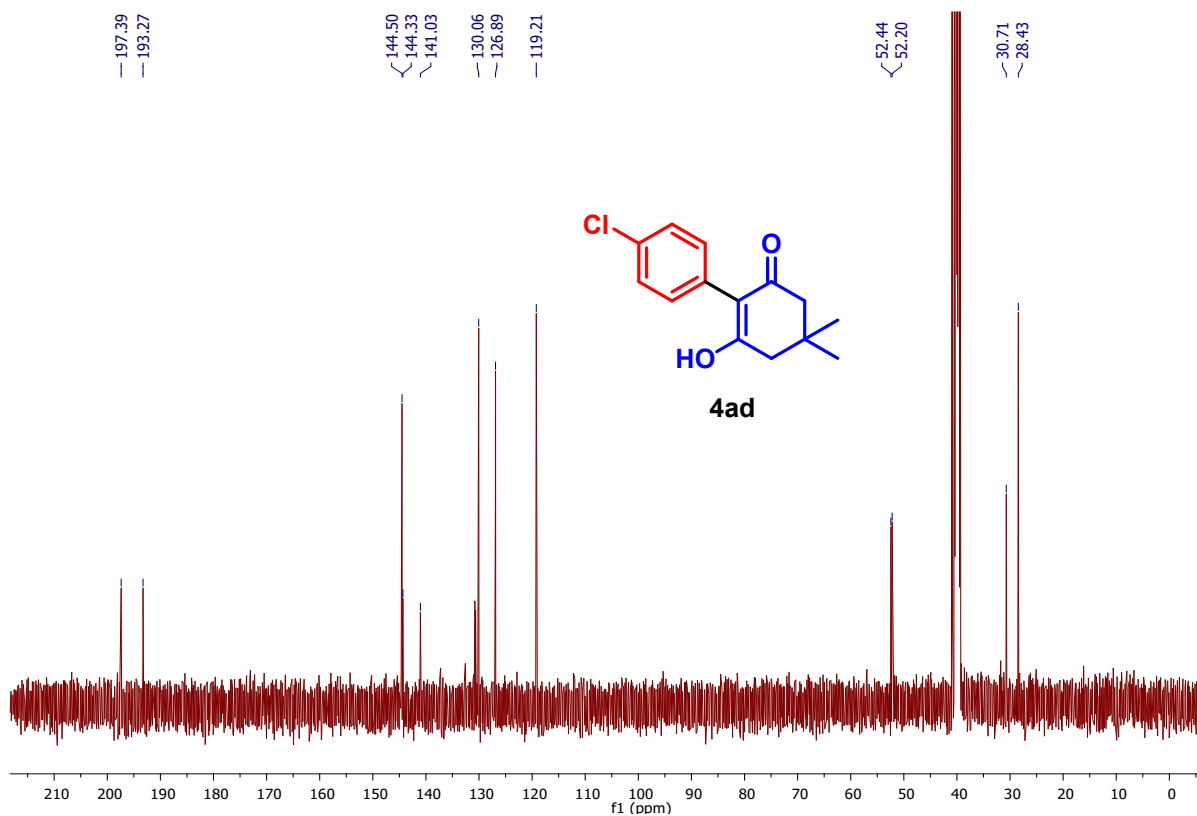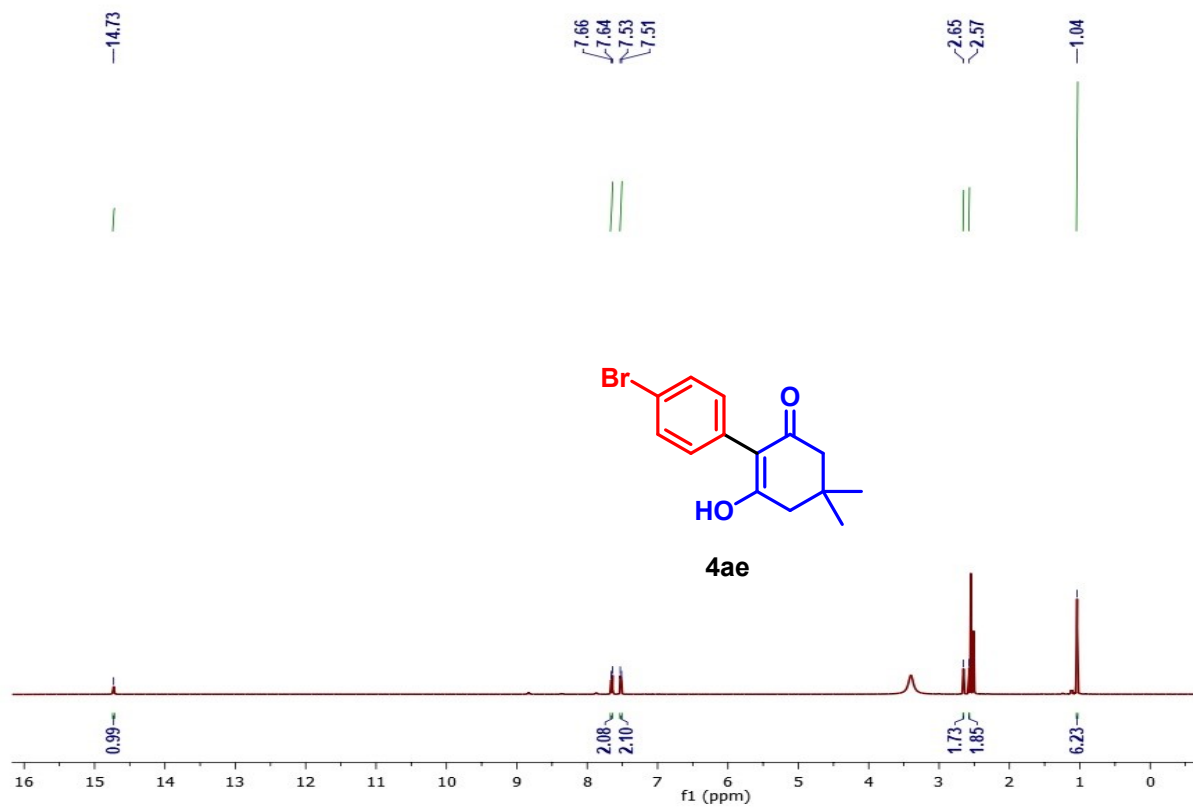

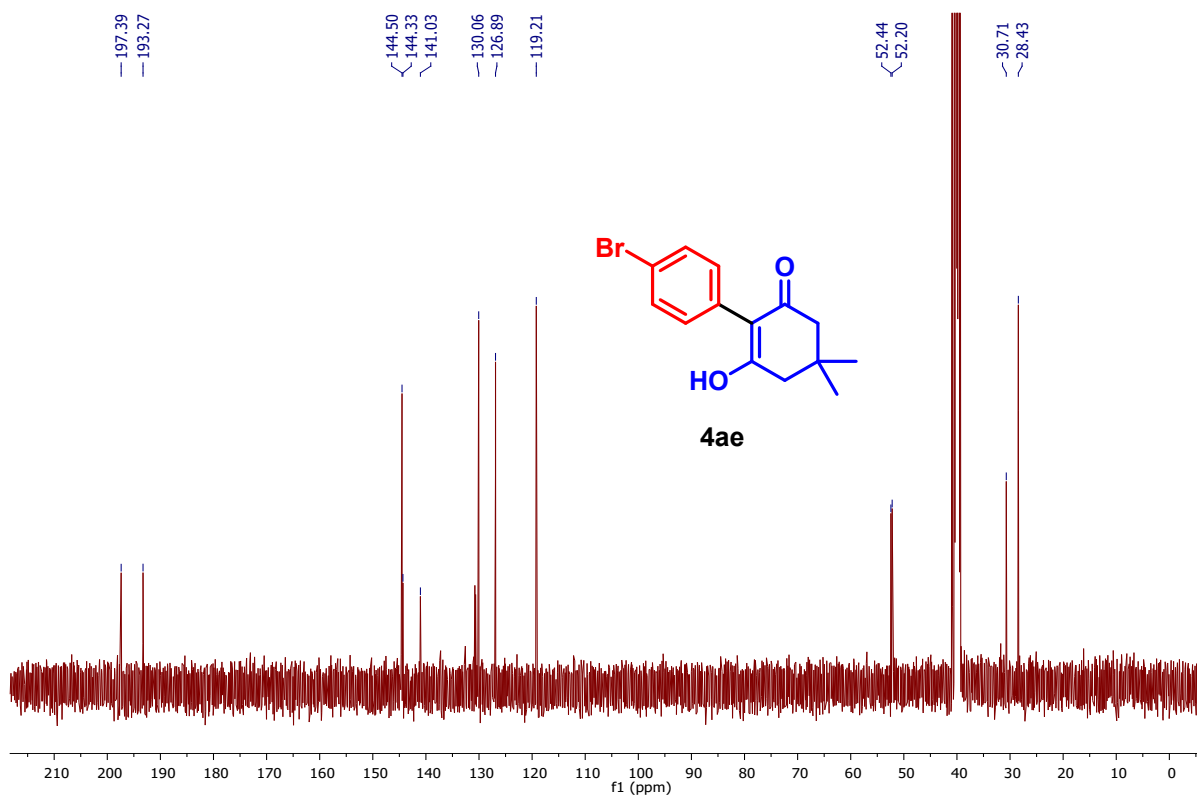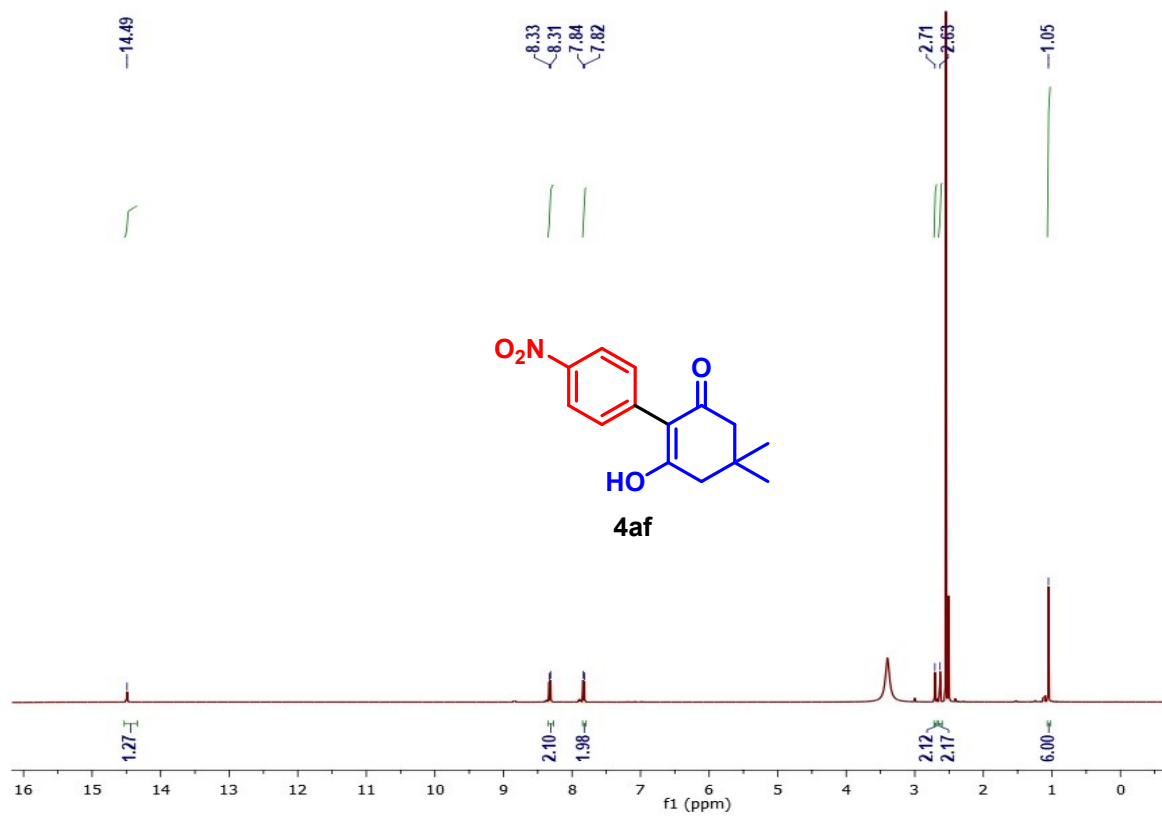

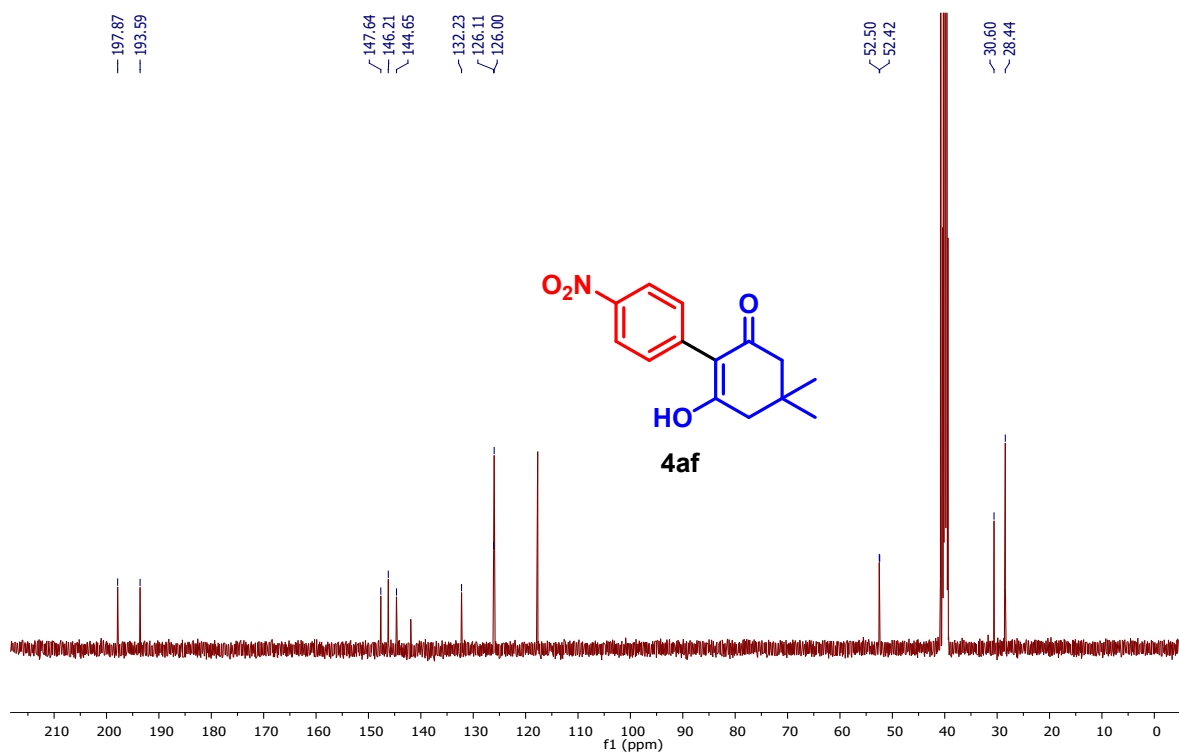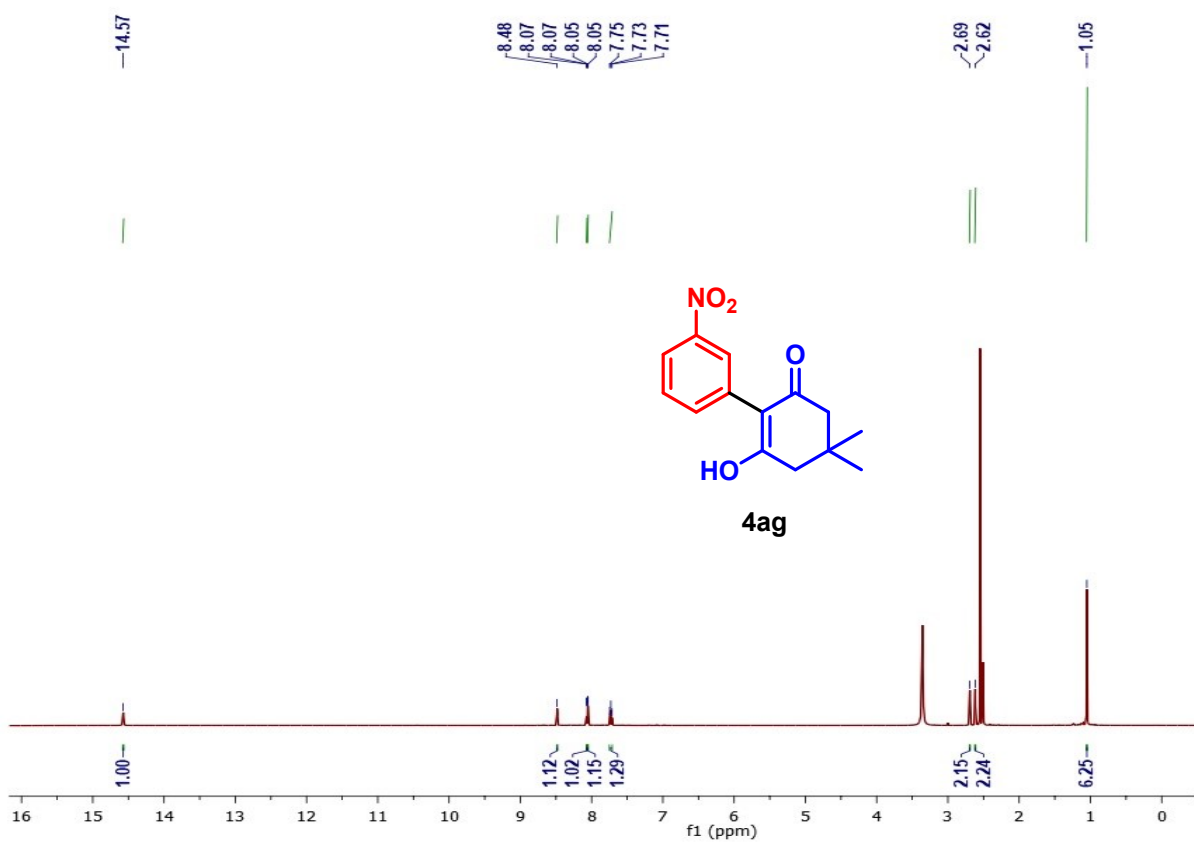

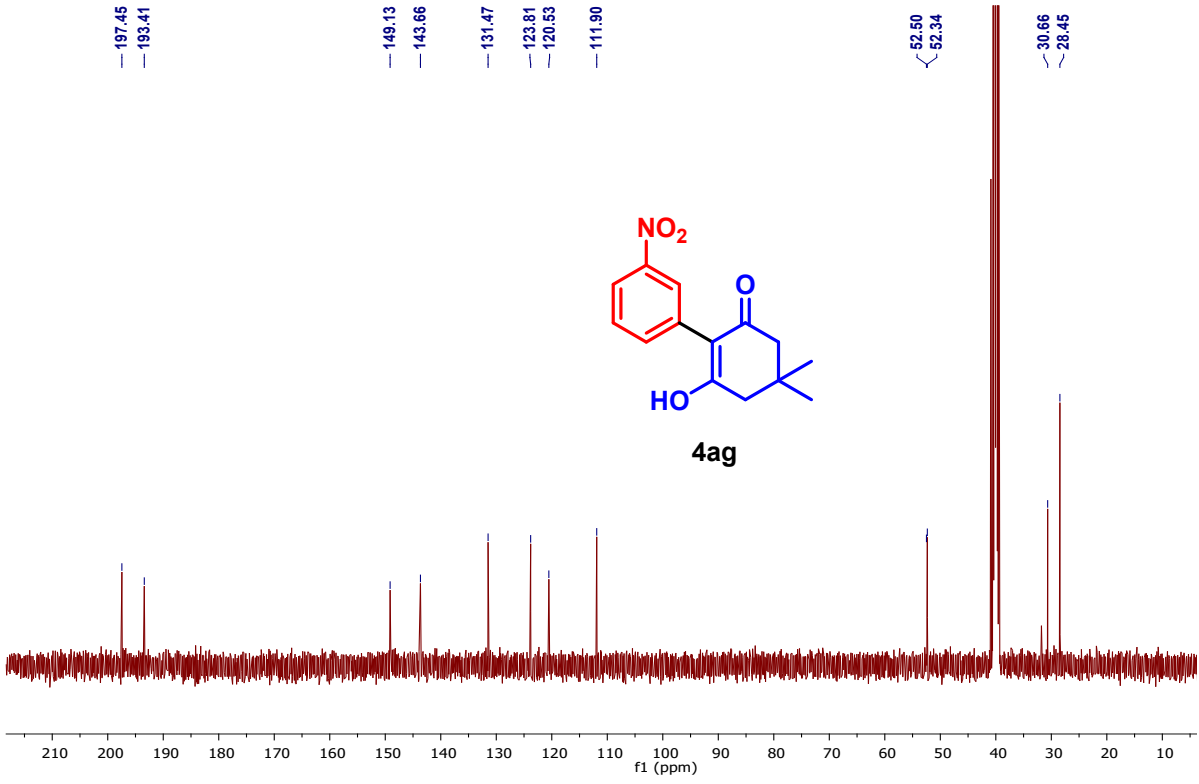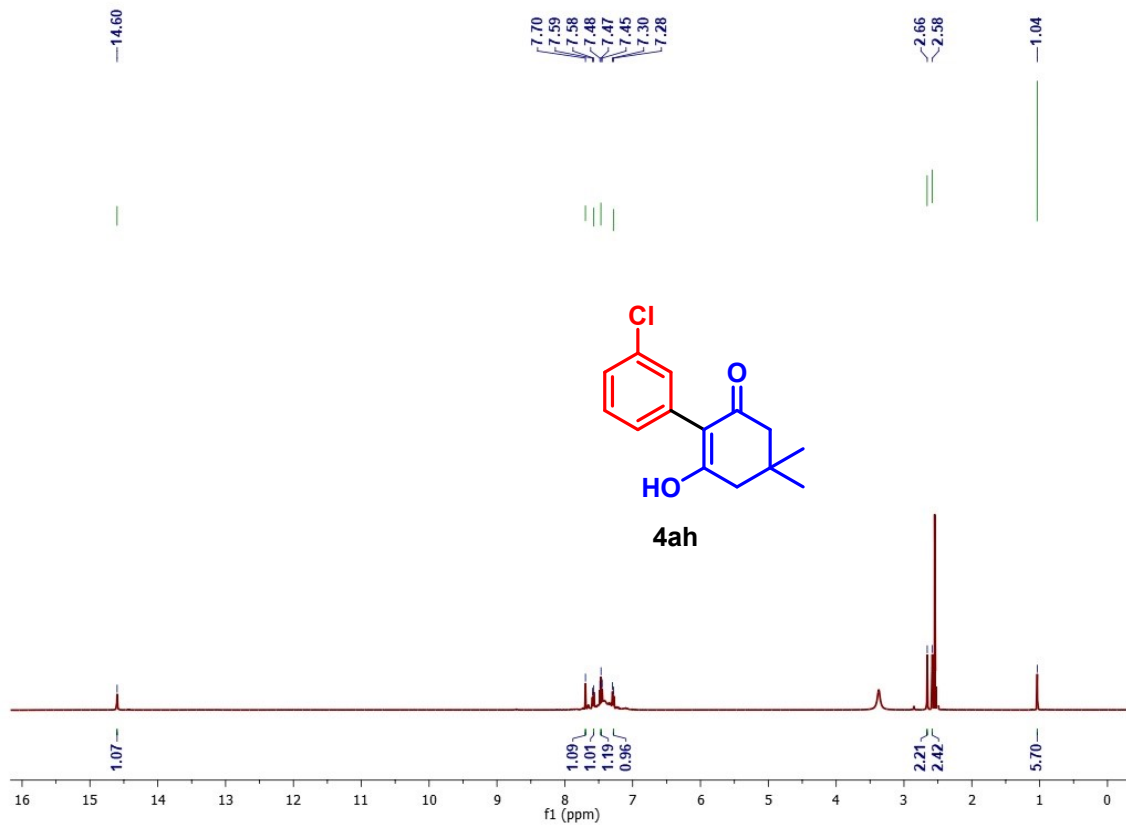



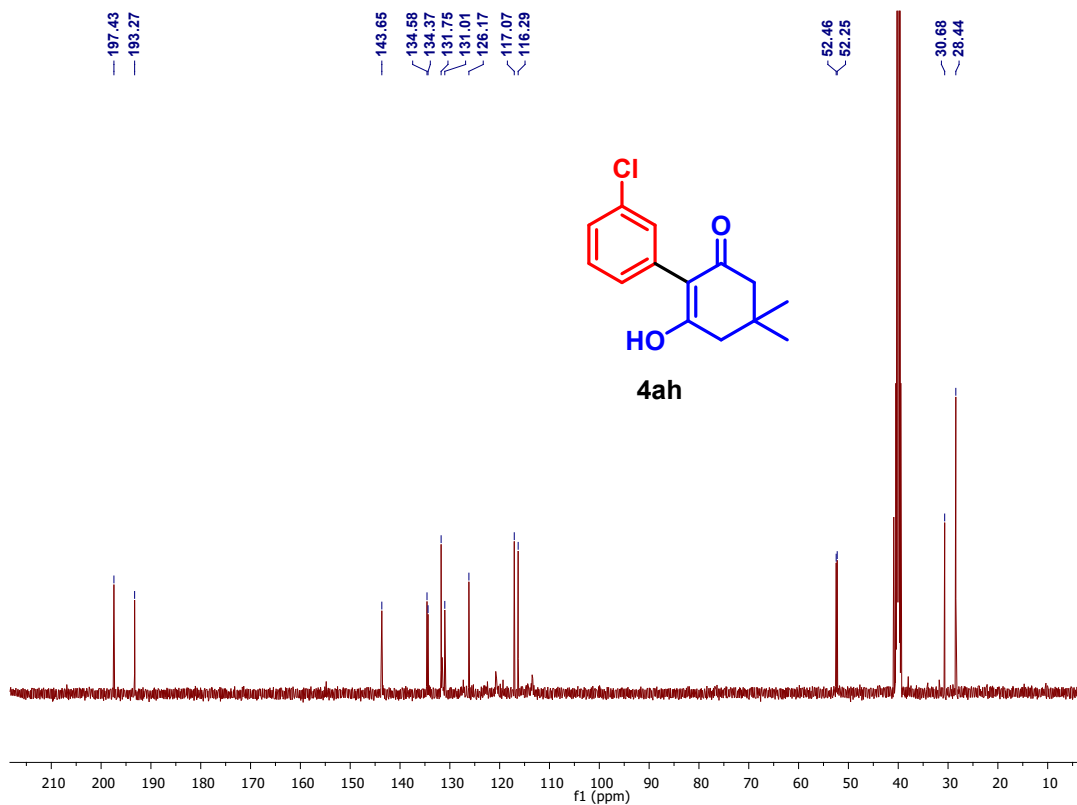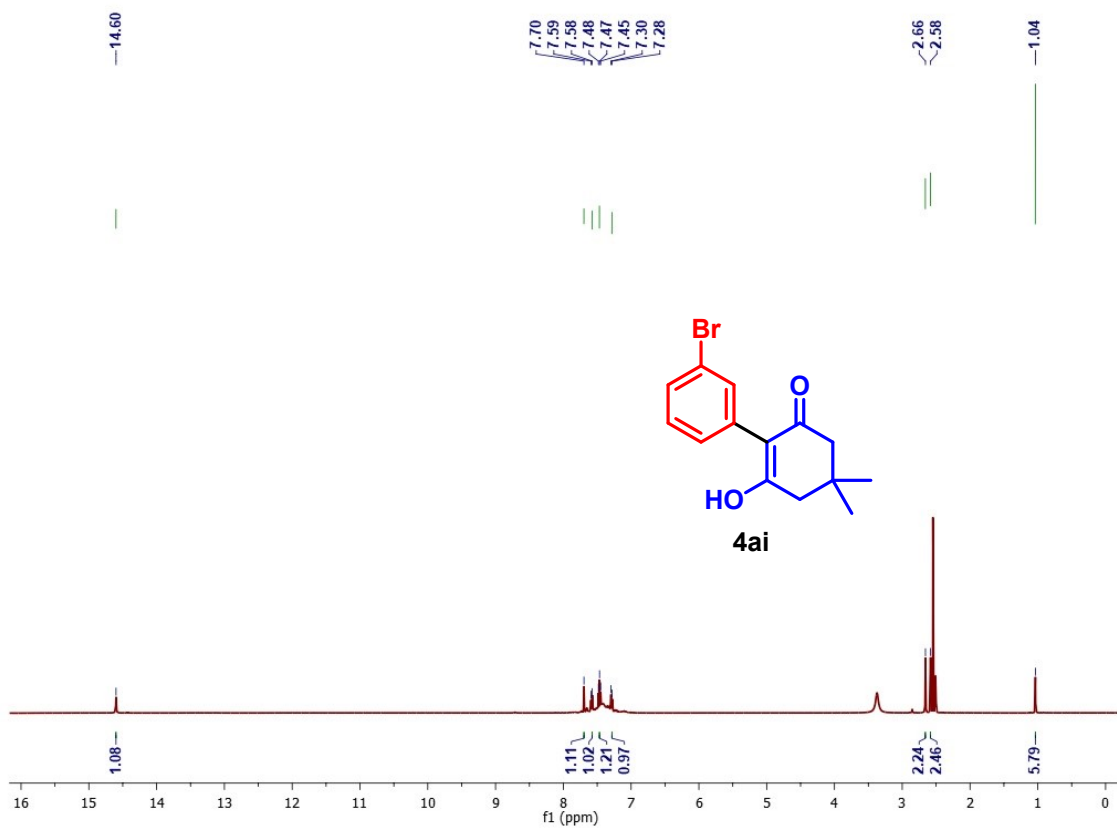

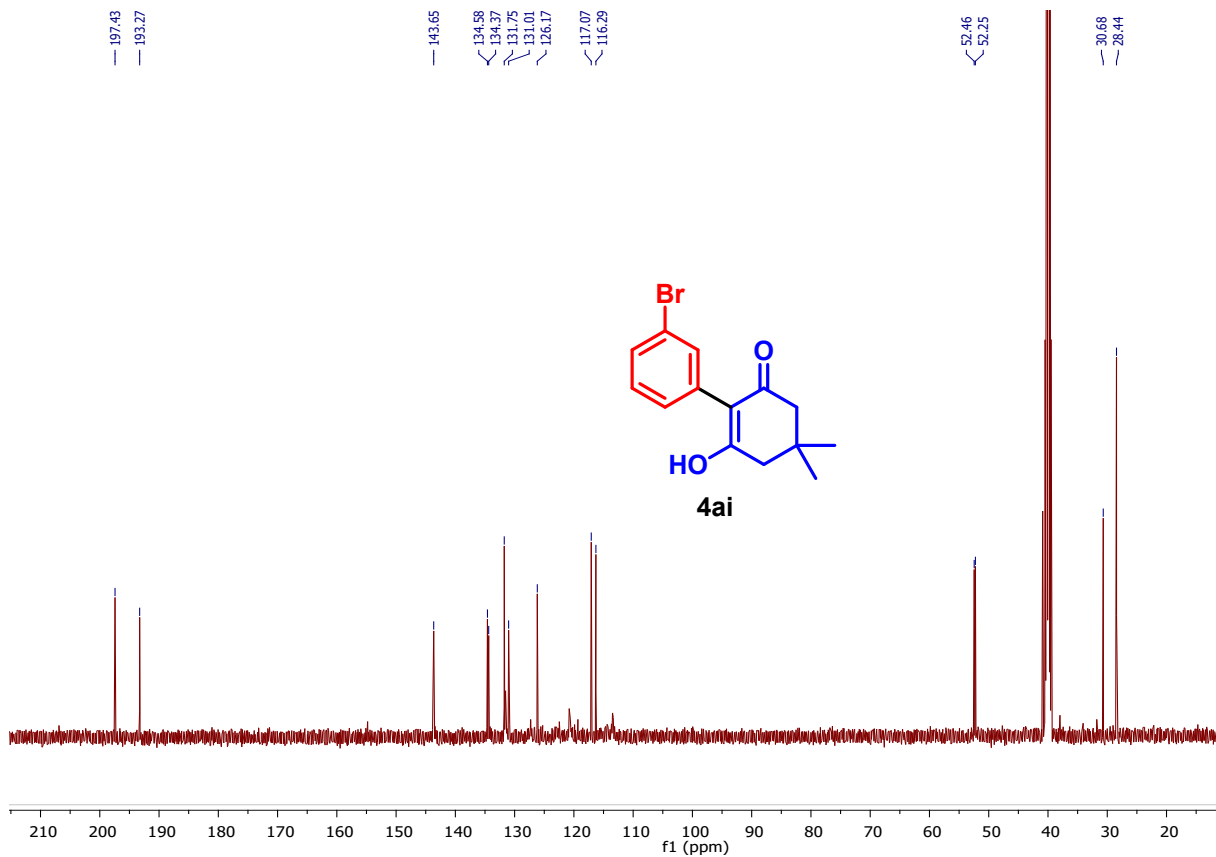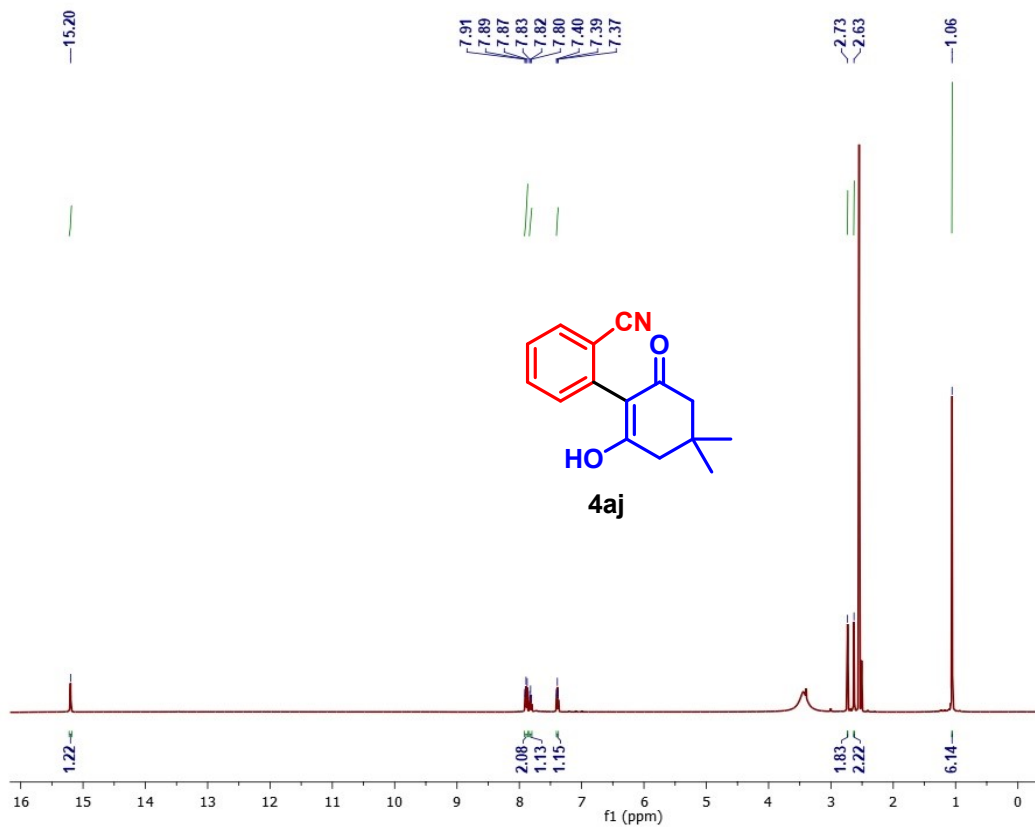

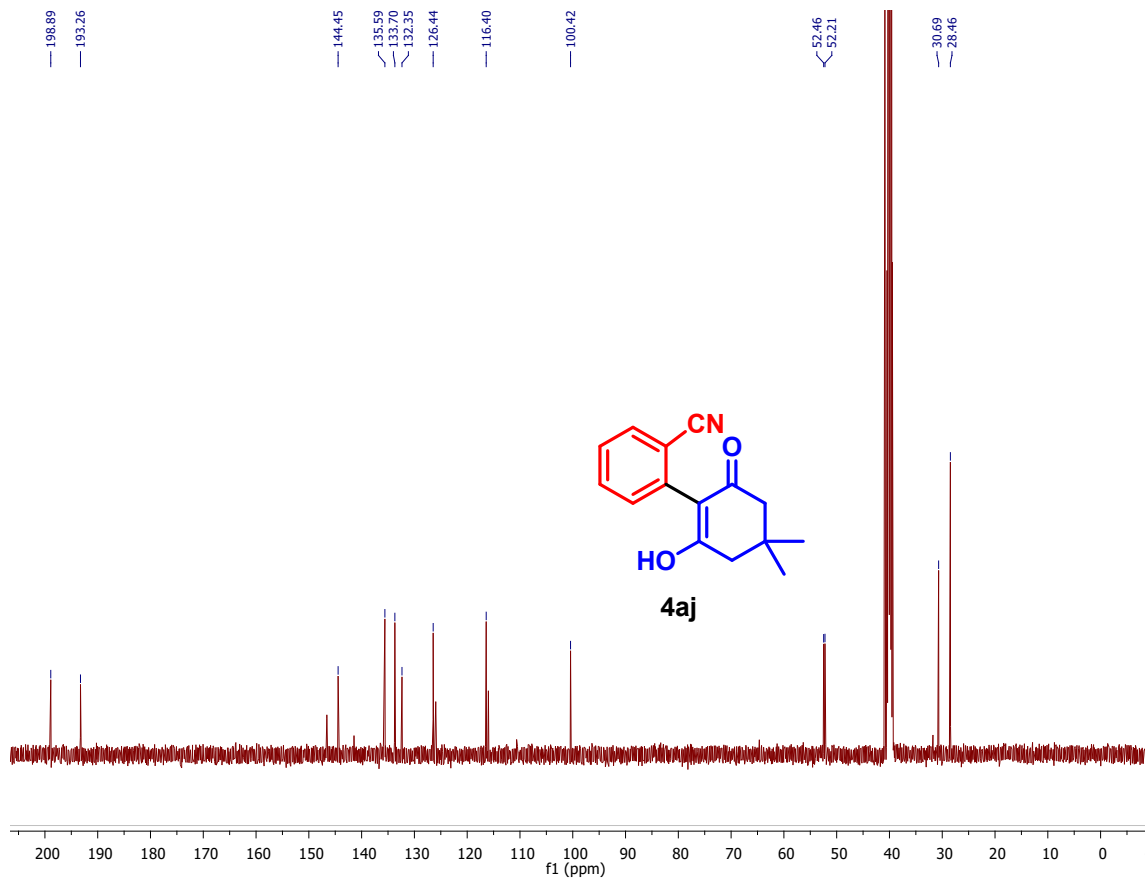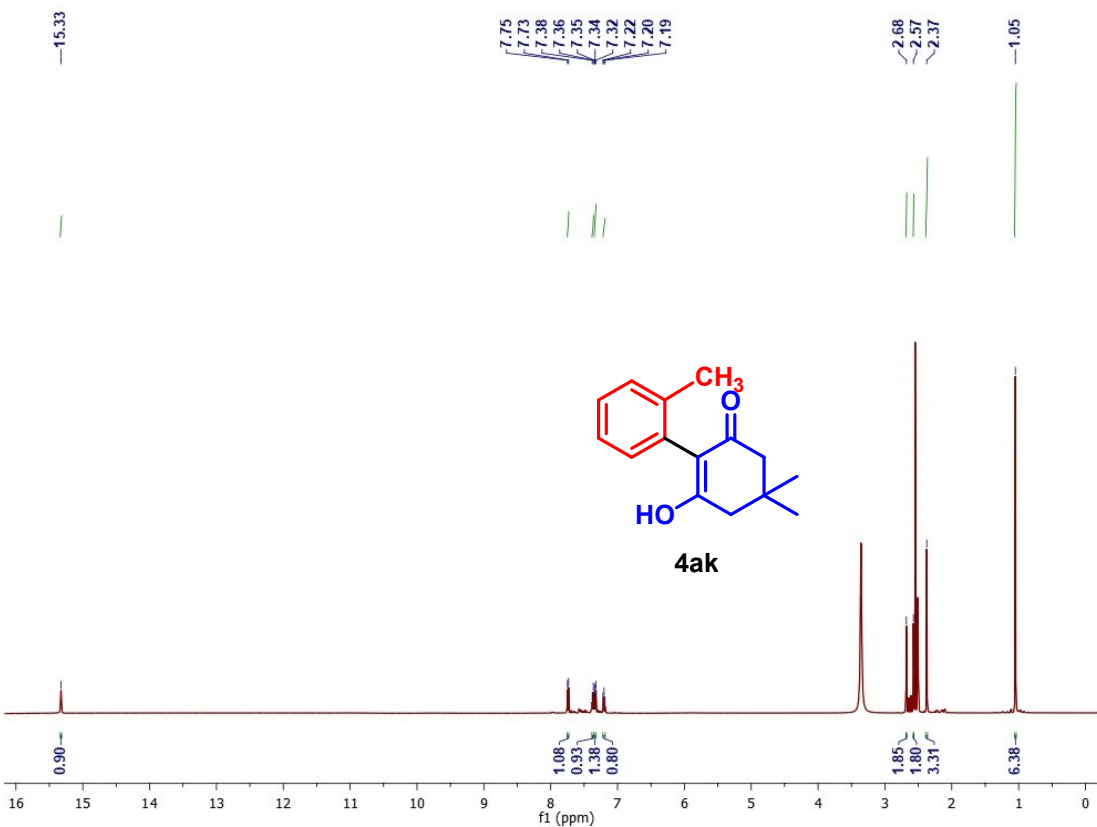

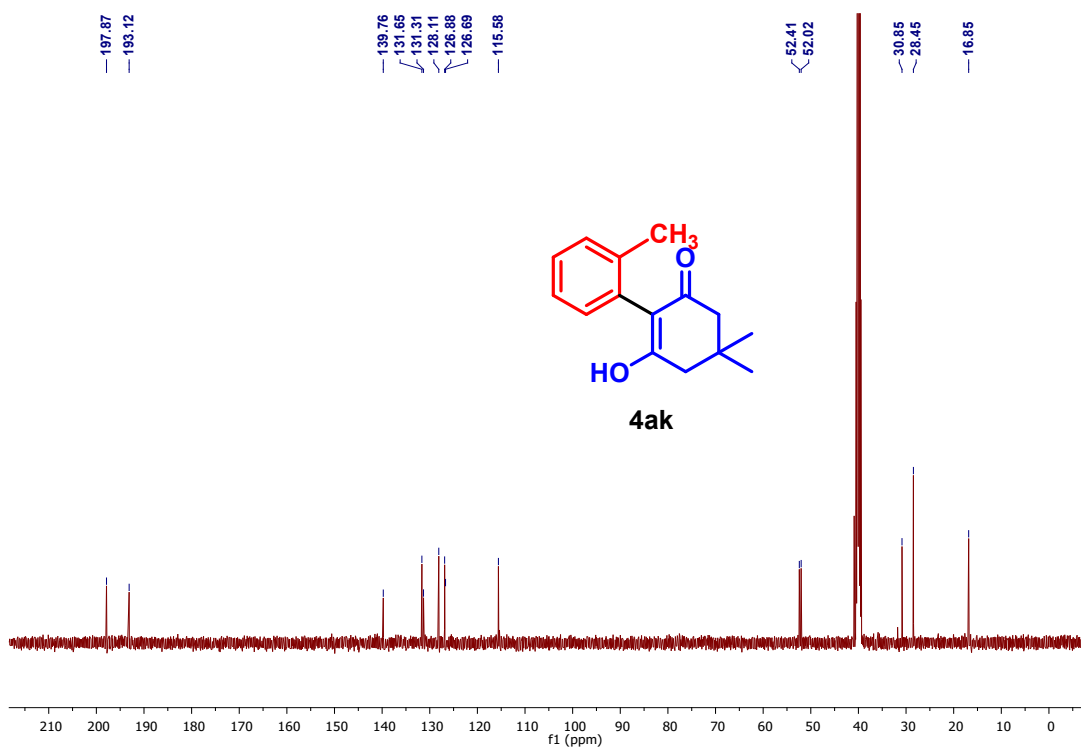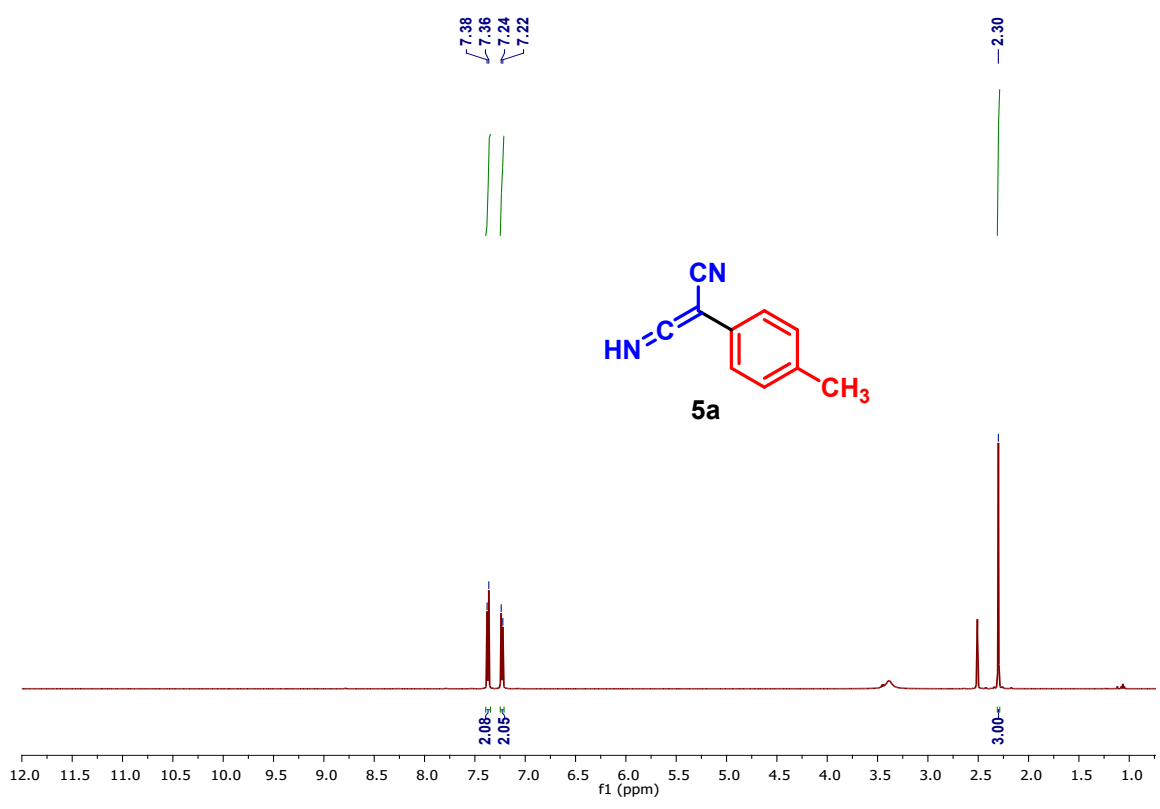

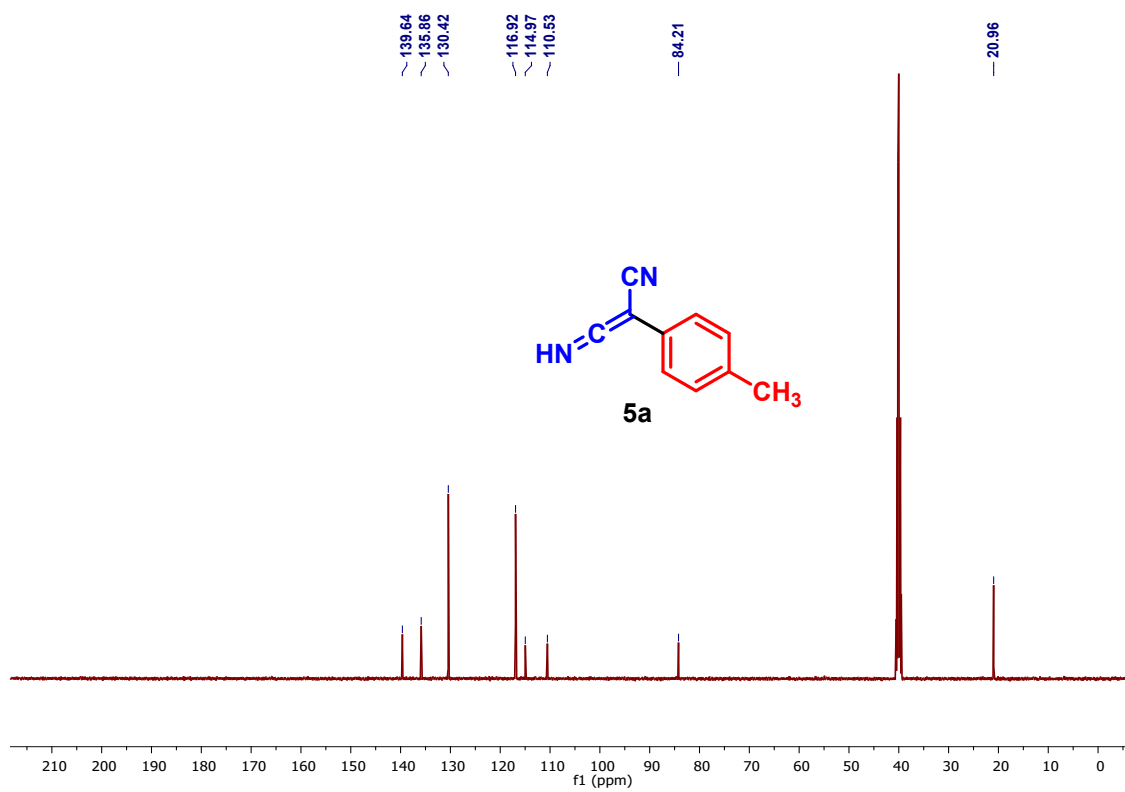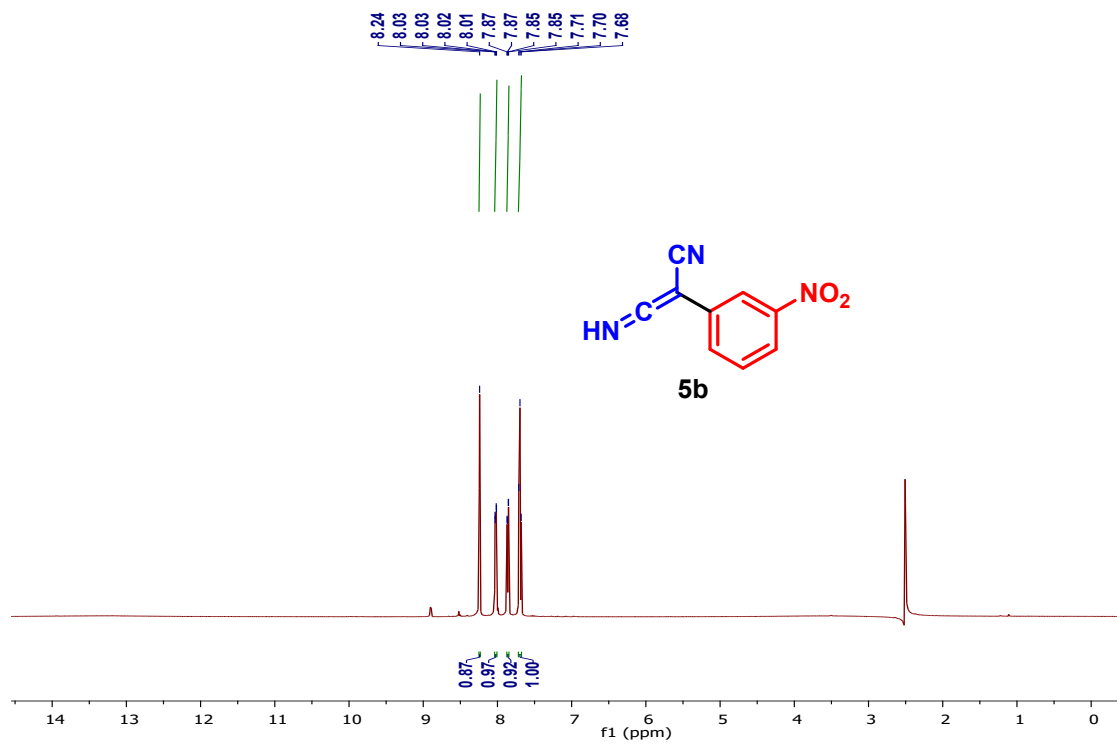

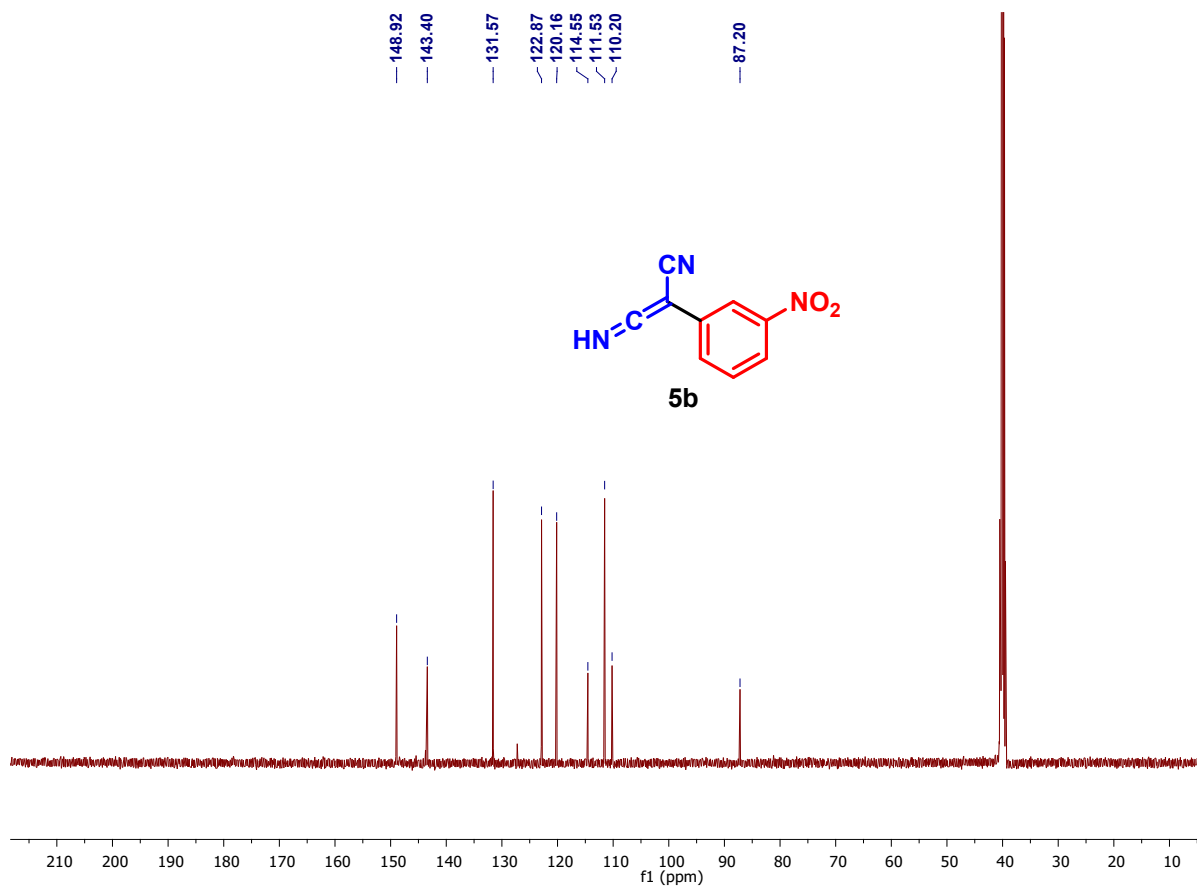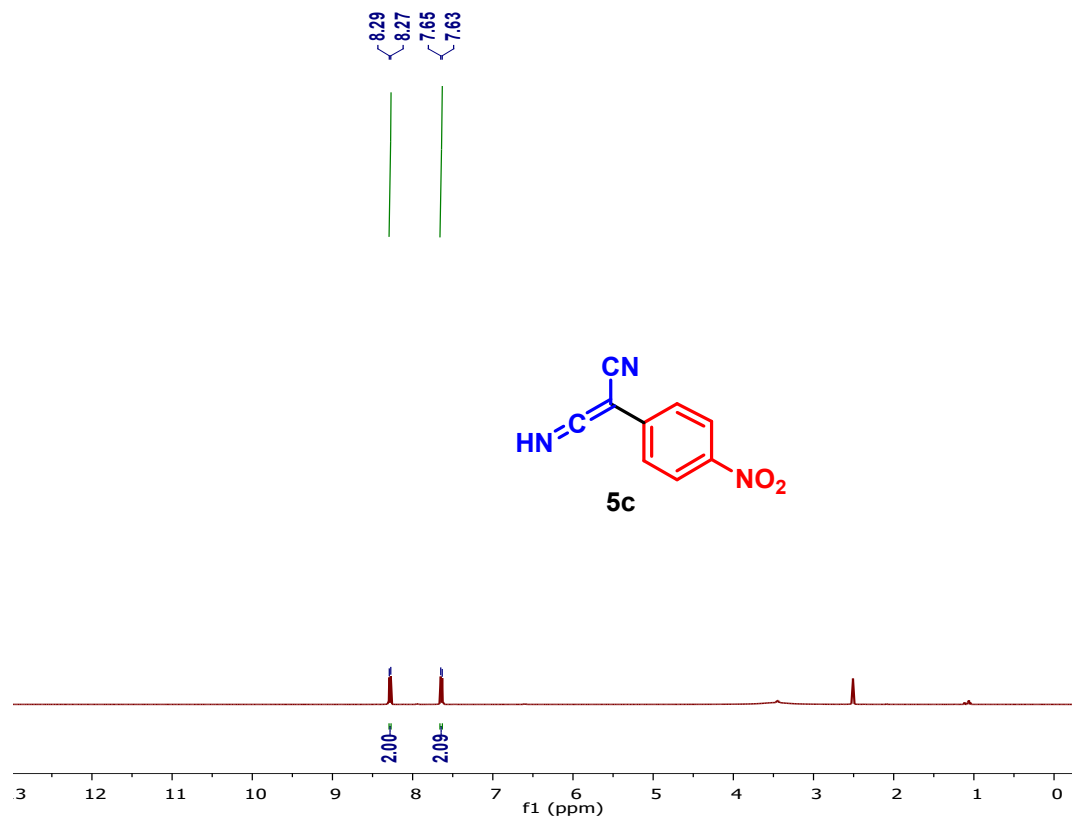

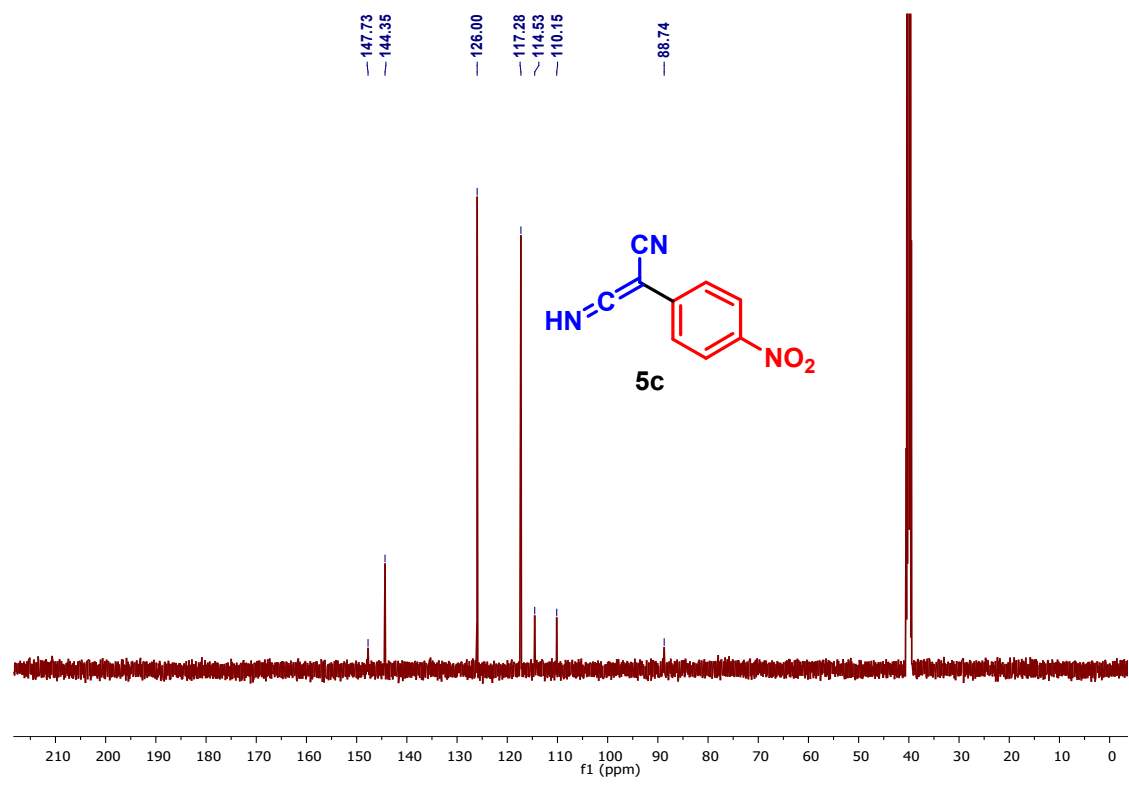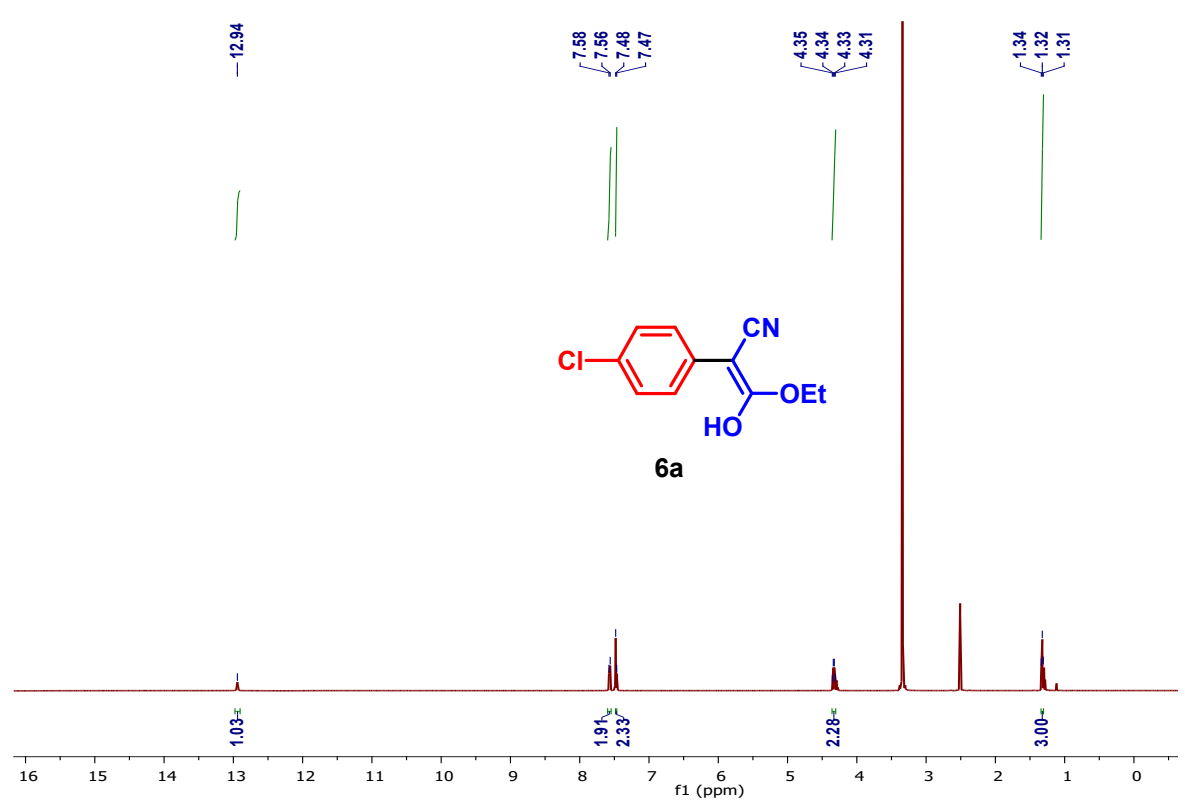

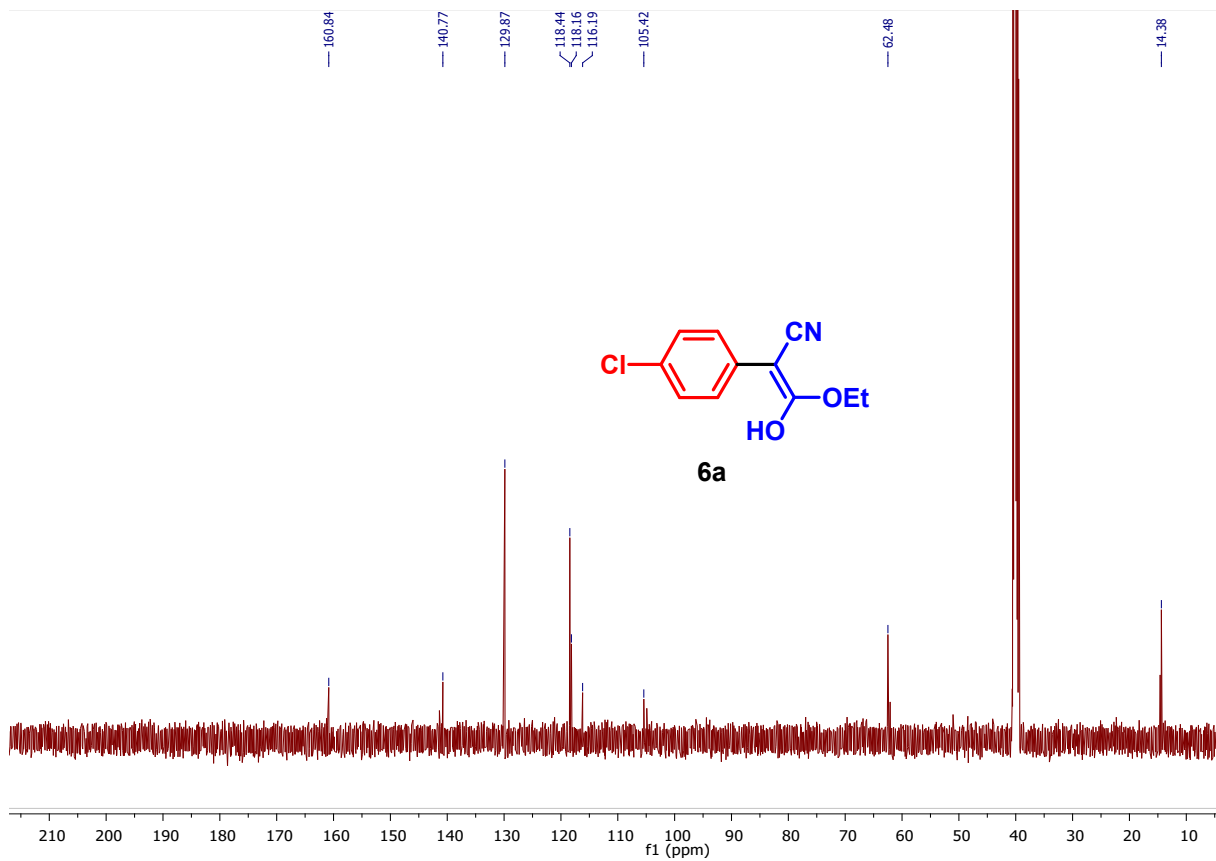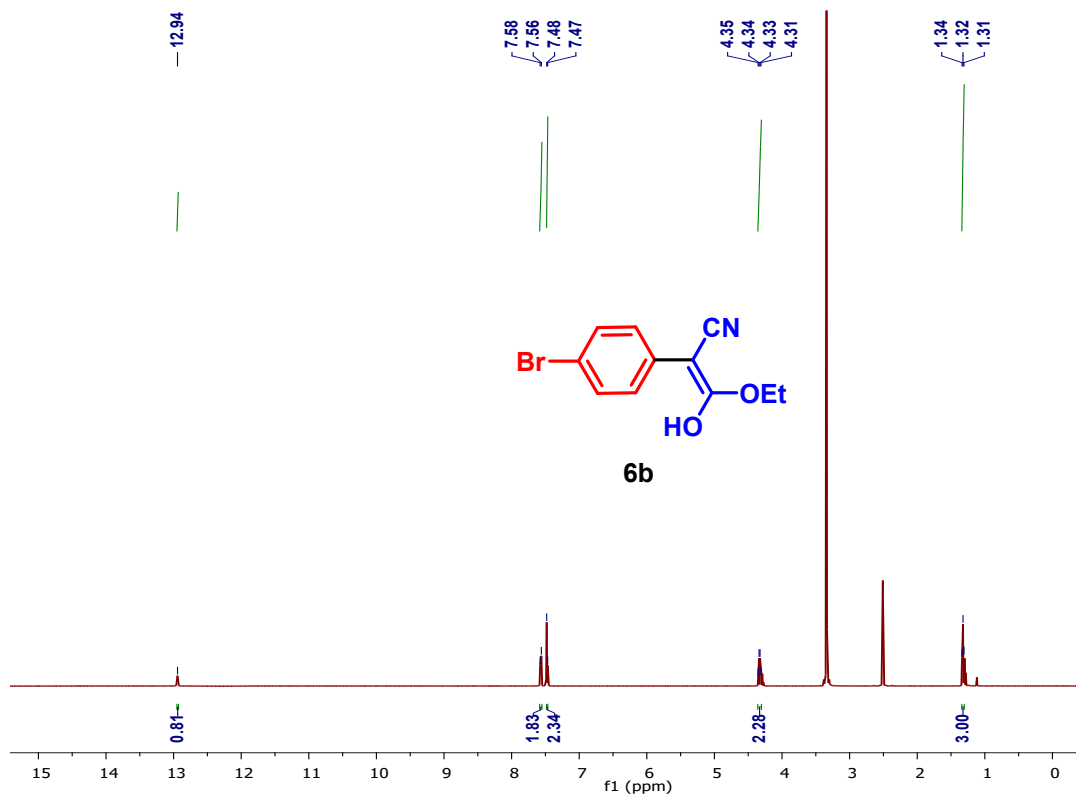



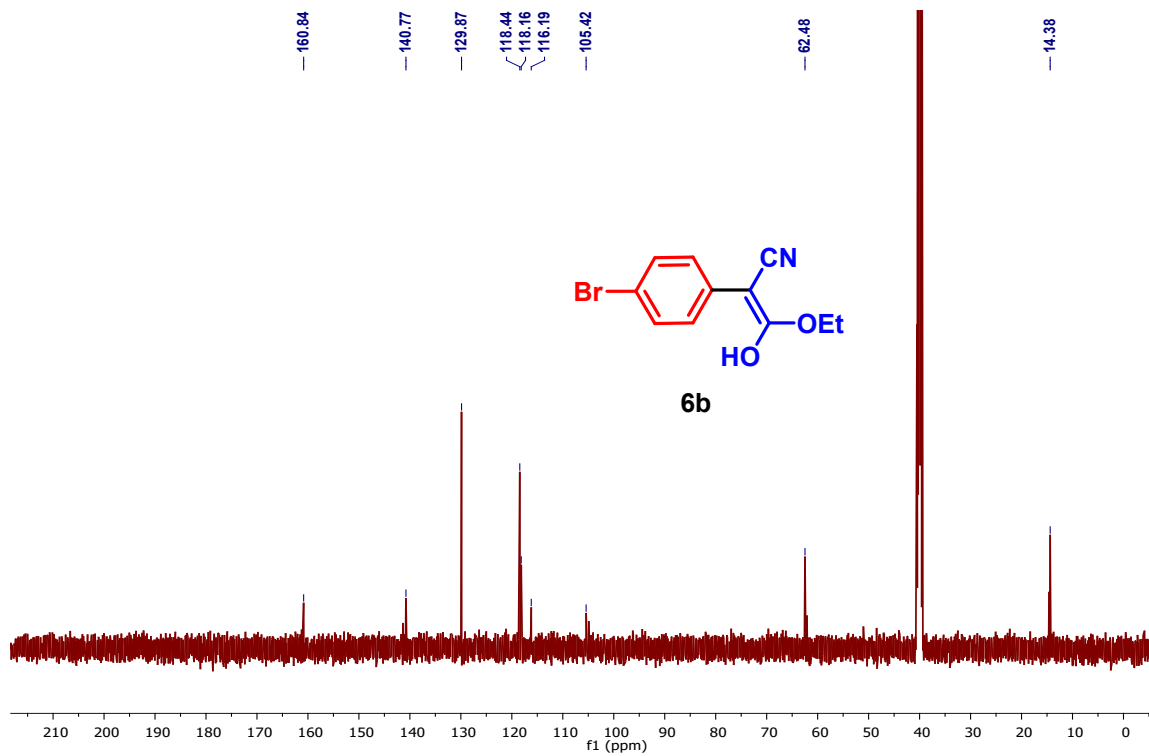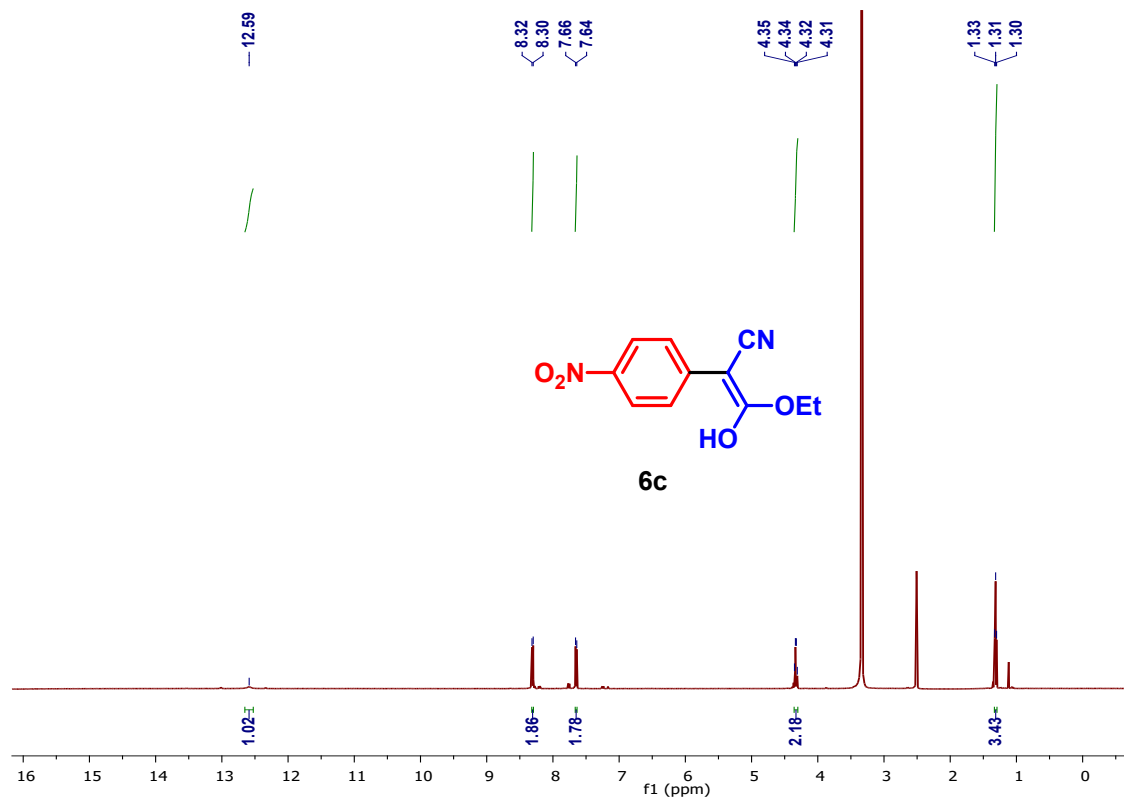

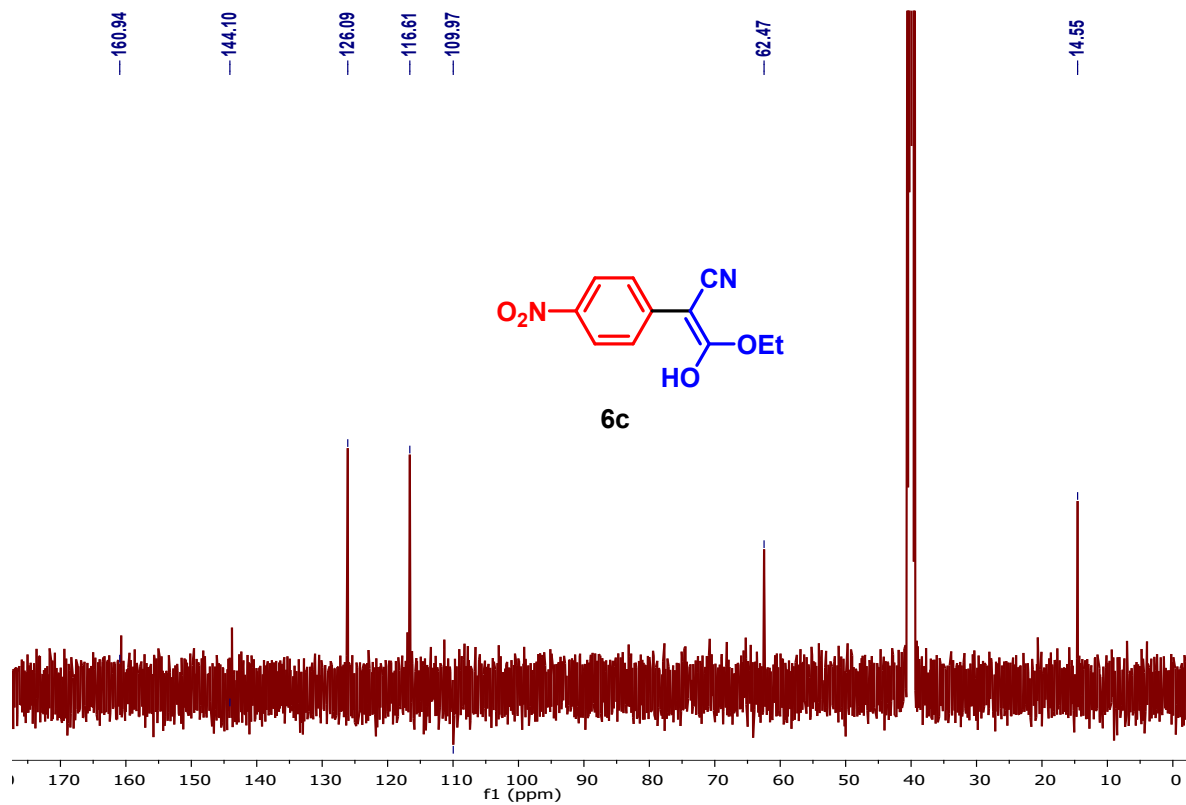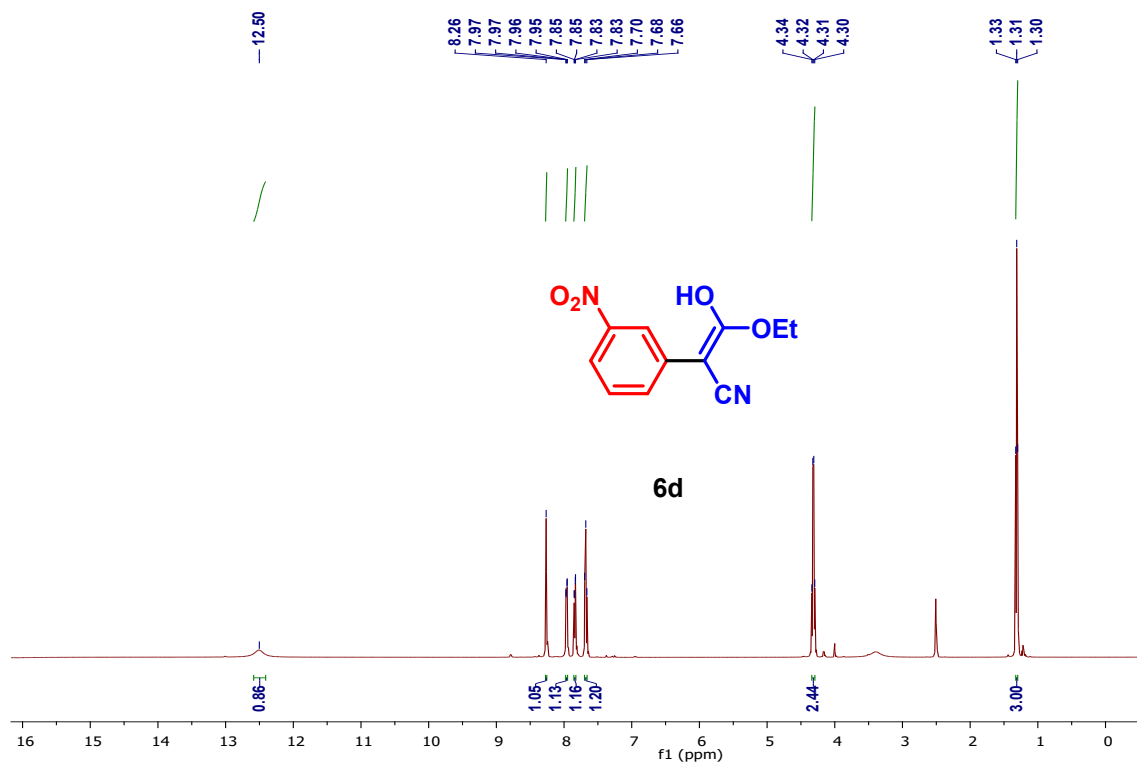

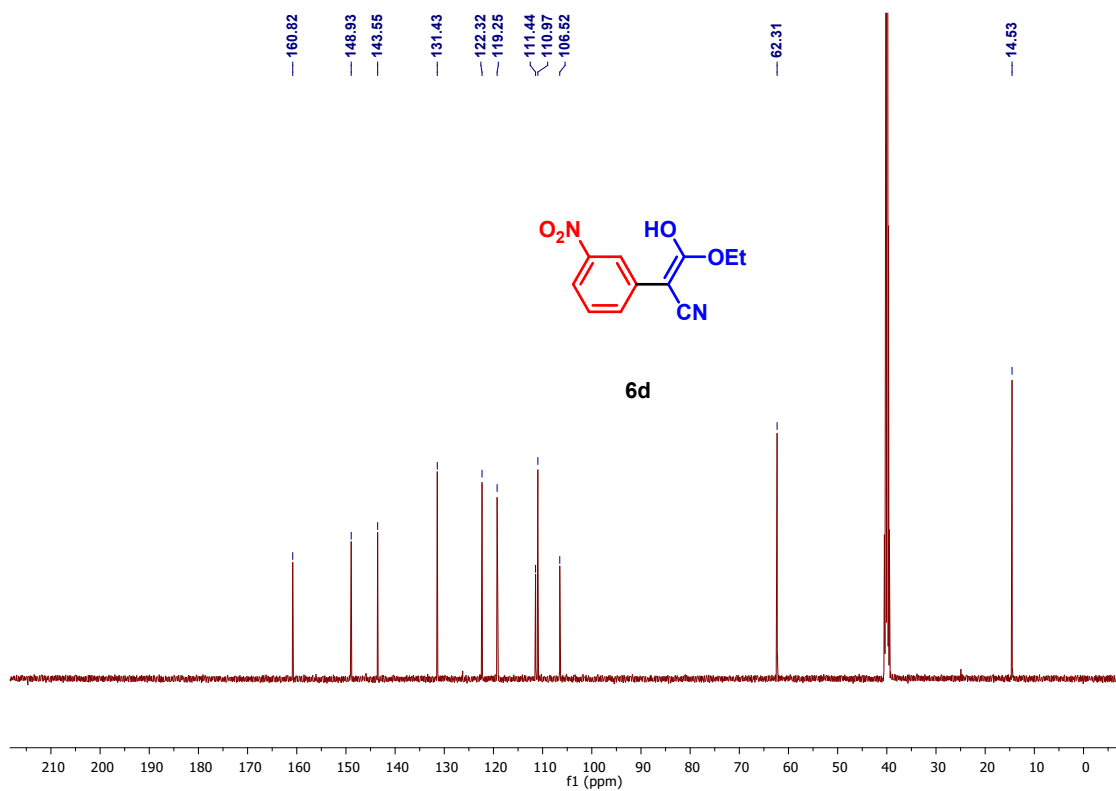

## 6. HRMS Spectra

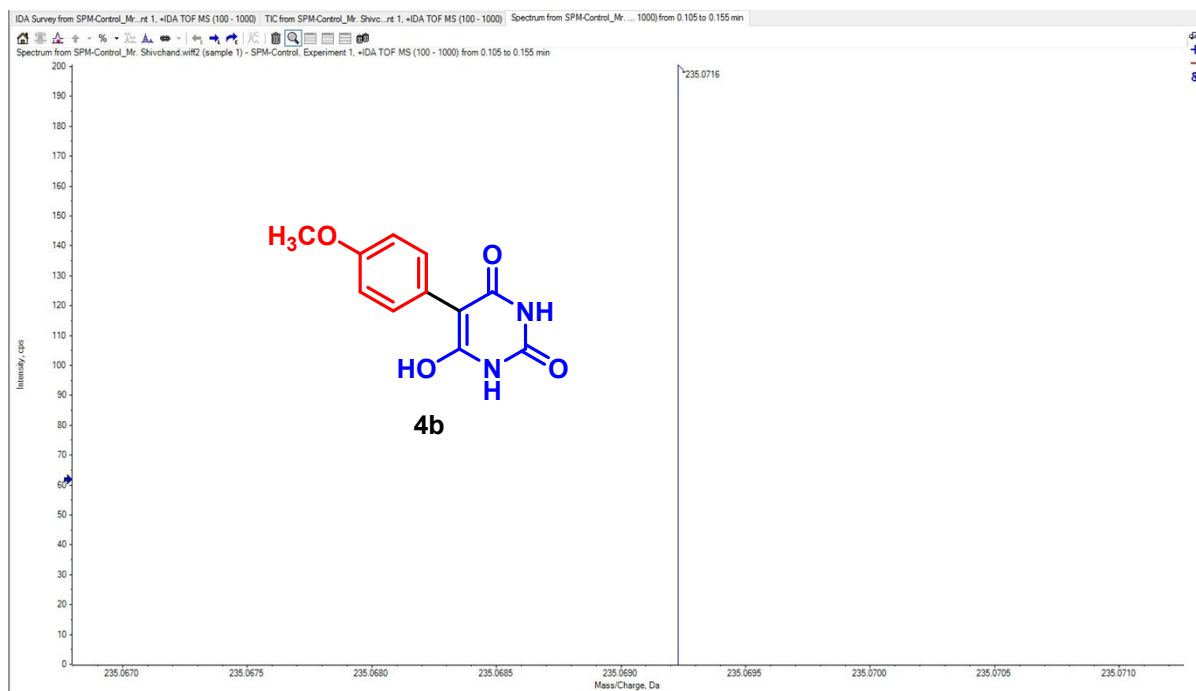

Figure S4

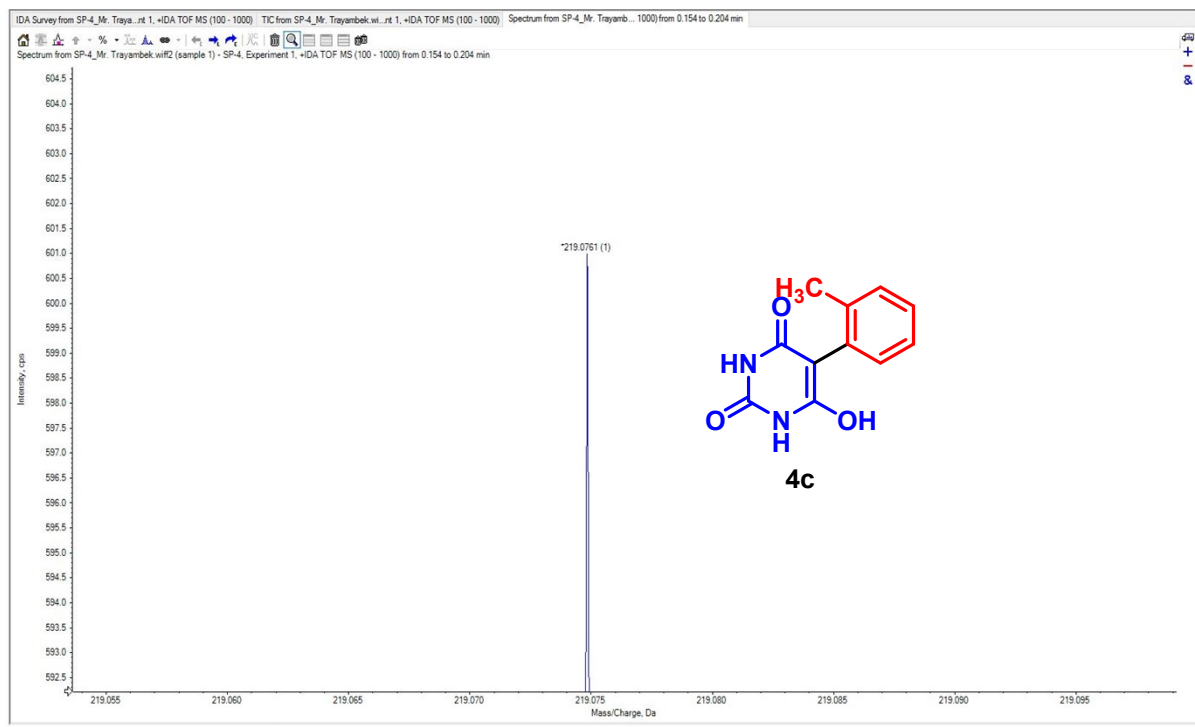

Figure S5

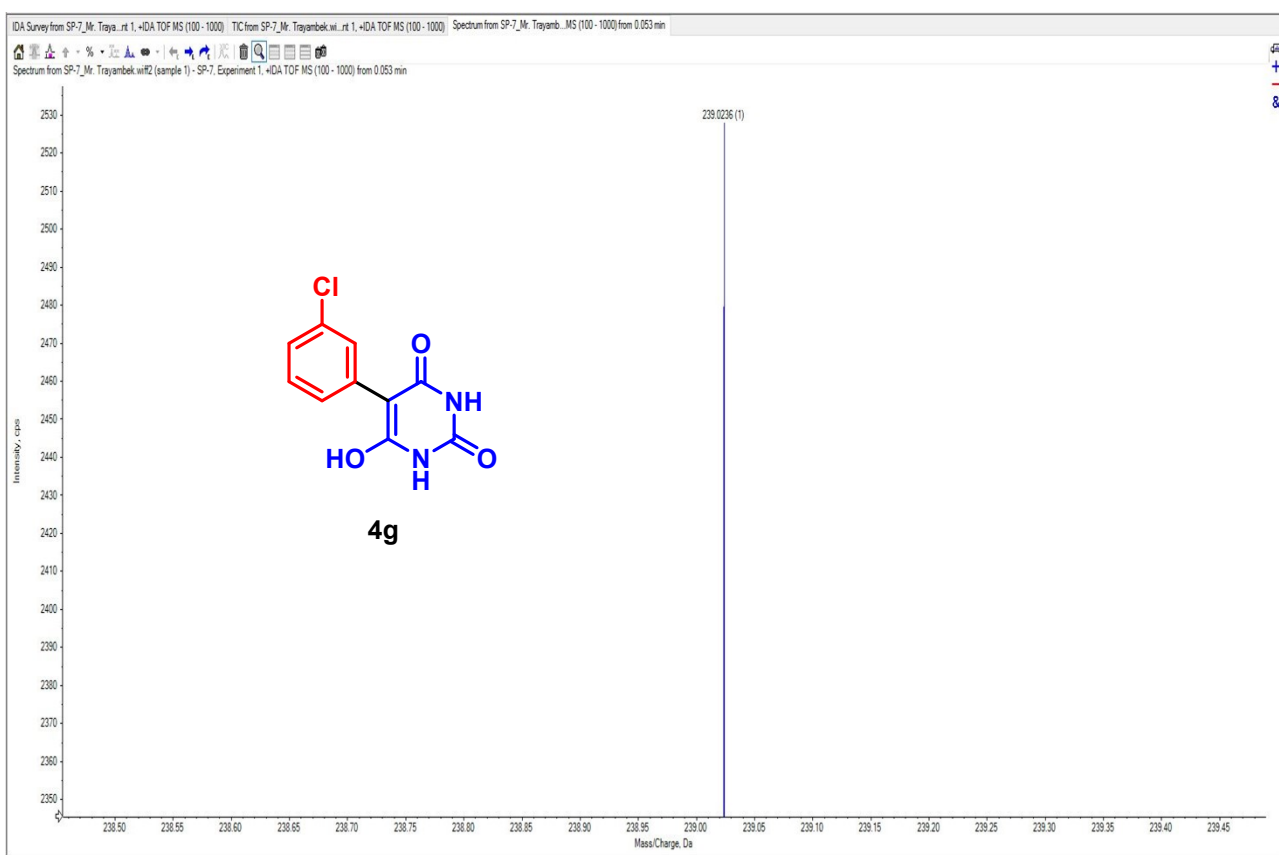

Figure S6

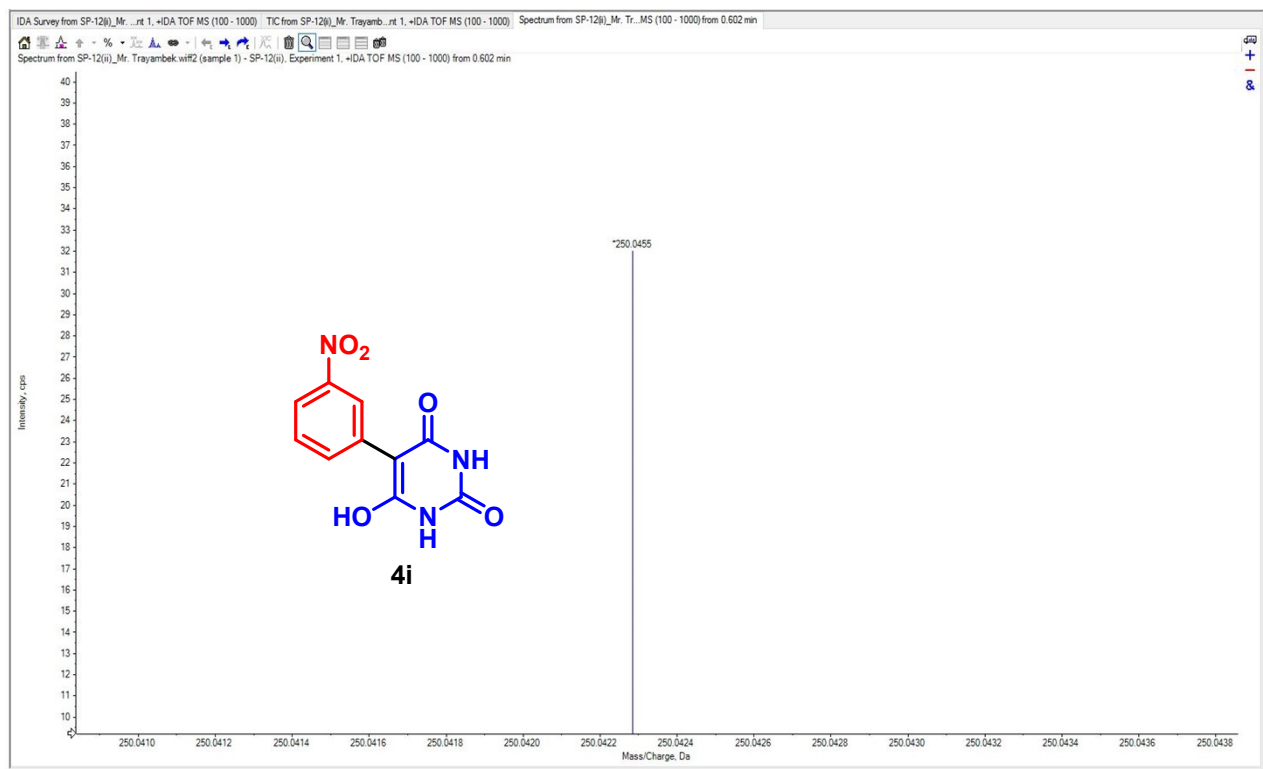

Figure S7

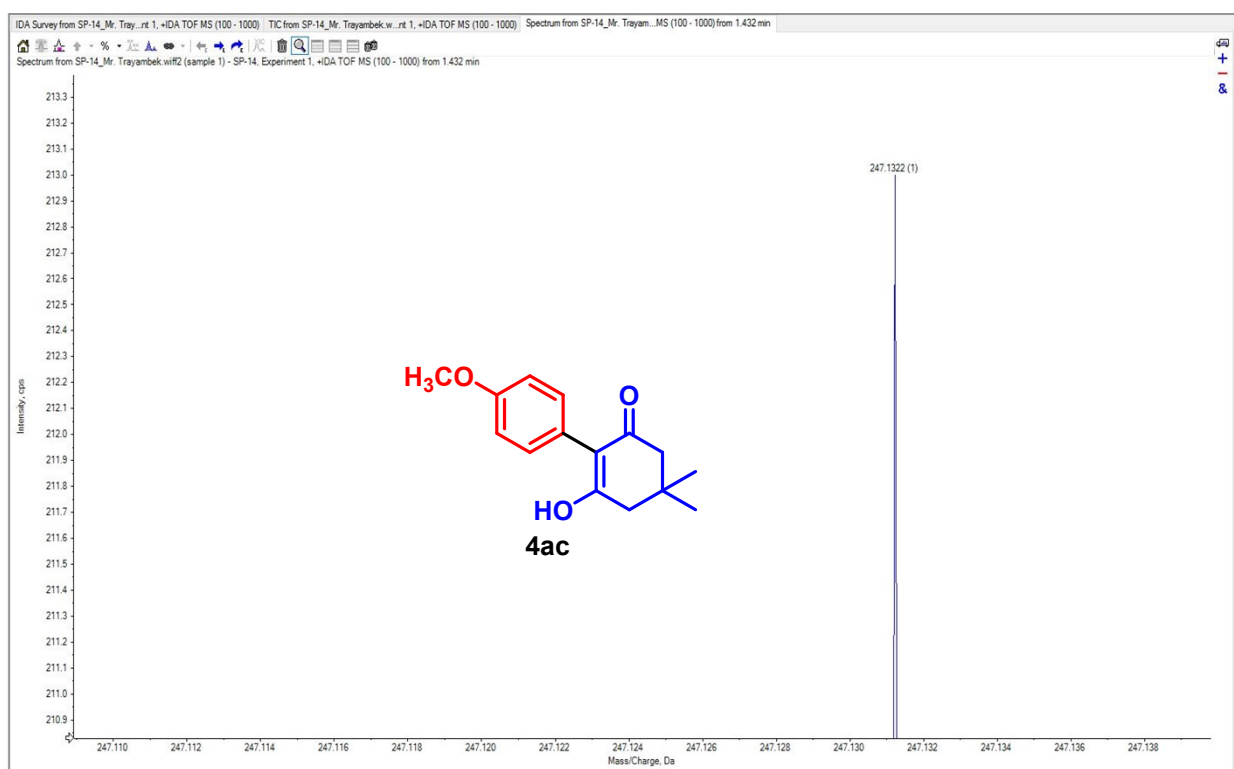

Figure S8

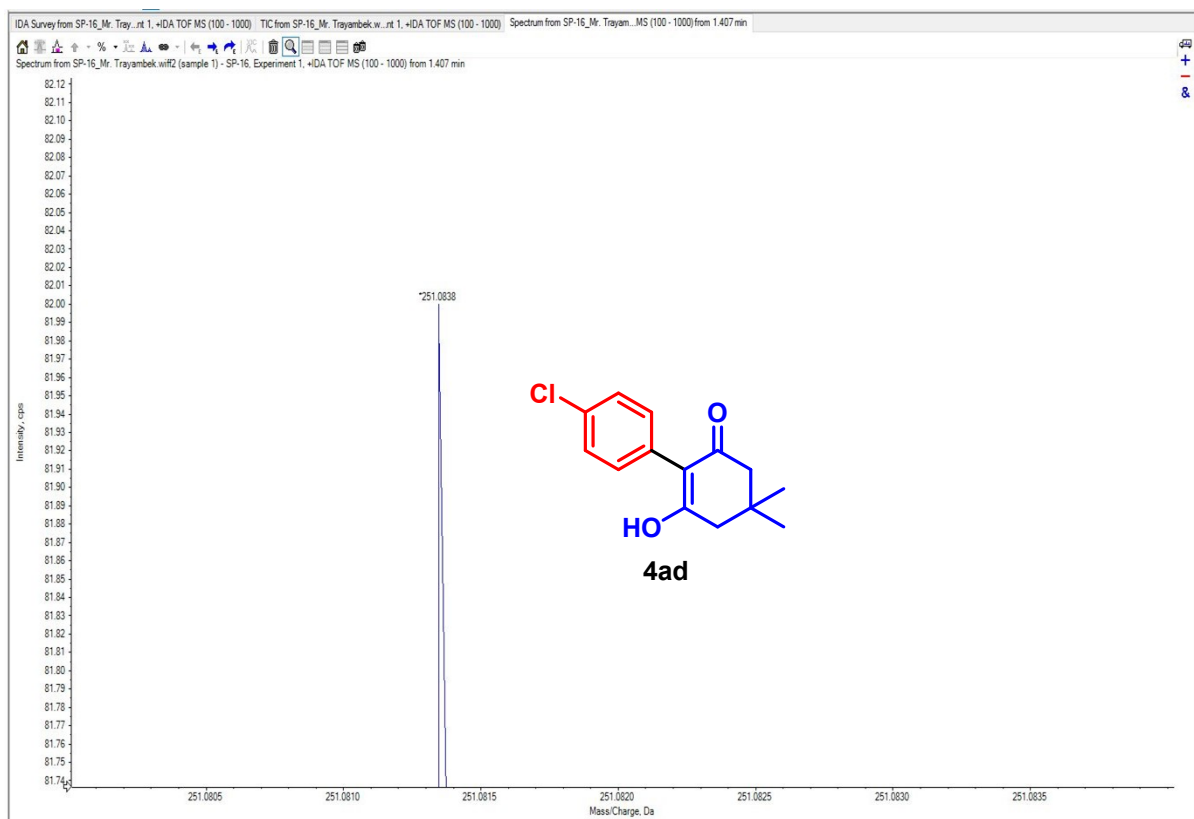

Figure S9

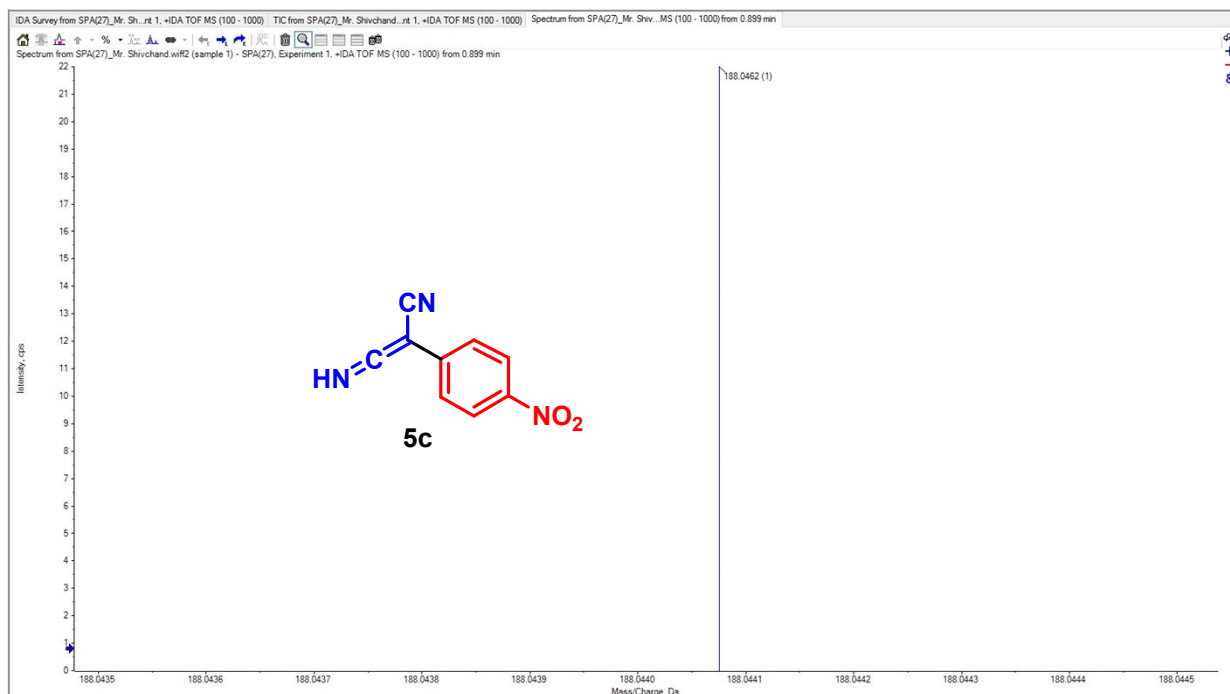

Figure S10

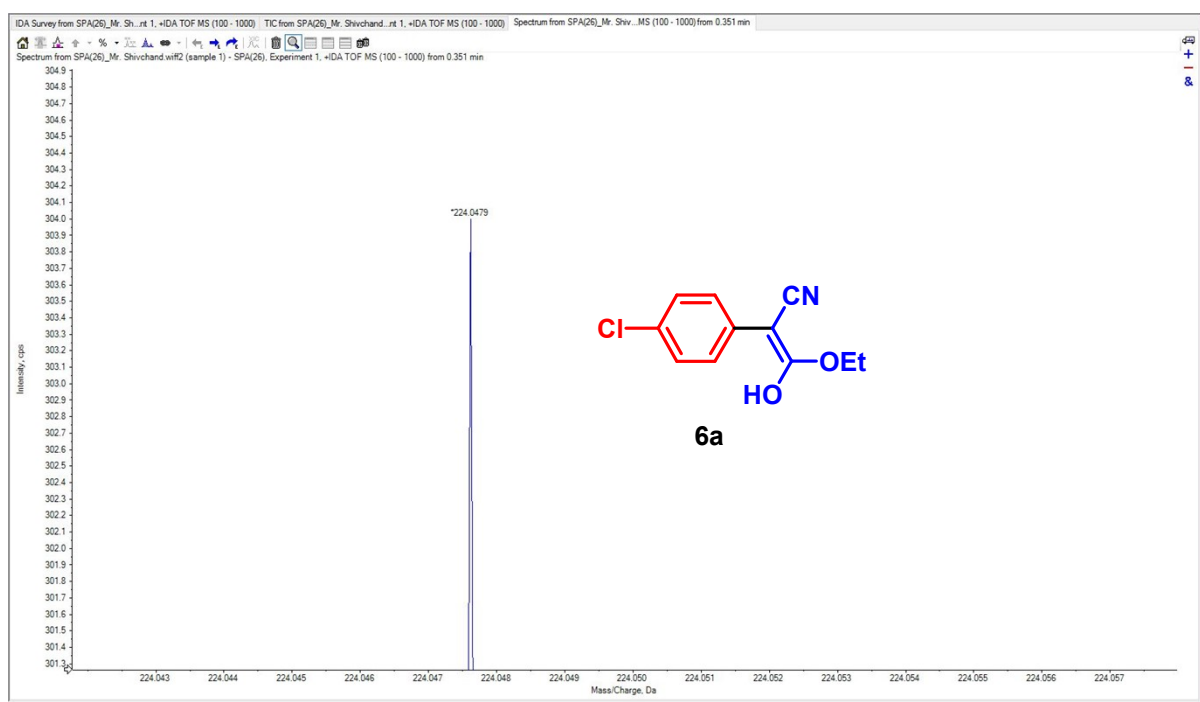

Figure S11

## 7. Optimization-Table

Table S1. Optimization of the reaction- conditions<sup>a</sup>

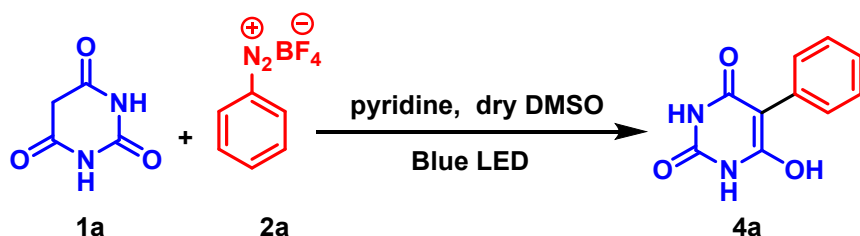

| Entry           | Bases                           | Solvents           | Yield <sup>b</sup> (%) |
|-----------------|---------------------------------|--------------------|------------------------|
| 1               | Na <sub>2</sub> CO <sub>3</sub> | CH <sub>3</sub> CN | 19                     |
| 2               | Cs <sub>2</sub> CO <sub>3</sub> | CH <sub>3</sub> CN | 26                     |
| 3               | NaHCO <sub>3</sub>              | CH <sub>3</sub> CN | 21                     |
| 4               | K <sub>2</sub> CO <sub>3</sub>  | acetone            | 49                     |
| 5               | DIPEA                           | DMSO               | 10                     |
| 6               | Pyridine                        | DMSO               | 80                     |
| 7 <sup>c</sup>  | Pyridine                        | dry DMSO           | 92                     |
| 8               | Pyridine                        | DMF                | 71                     |
| 9               | Pyridine                        | H <sub>2</sub> O   | nr                     |
| 10              | Pyridine                        | CH <sub>3</sub> CN | 22                     |
| 11              | Pyridine                        | Ethanol            | nr                     |
| 12              | Pyridine                        | DCM                | trace                  |
| 13              | Pyridine                        | -                  | 49                     |
| 14              | -                               | CH <sub>3</sub> CN | nr                     |
| 15 <sup>d</sup> | Pyridine                        | dry DMSO           | nr                     |
| 16 <sup>e</sup> | Pyridine                        | dry DMSO           | 36                     |
| 17 <sup>f</sup> | Pyridine                        | dry DMSO           | 79                     |

<sup>a</sup>Reaction condition: 1a (1.0 mmol), 2a (1.0 mmol), Pyridine (3 equiv), solvents (5 mL) at room temperature, for 40-45 min, and irradiate under blue LED. <sup>b</sup> Isolated yield, <sup>c</sup>Blue LED, <sup>d</sup>In the dark, <sup>e</sup>a green LED, <sup>f</sup>White LED room temperature, reaction for 40-45 min. ( nr = no reaction)

Table S2. Optimization of catalyst<sup>a</sup>



| Entry | Catalysts(mol%)  | Base     | Solvent  | Yield <sup>b</sup> (%) |
|-------|------------------|----------|----------|------------------------|
| 1     | Eosin-Y (2)      | Pyridine | dry DMSO | 29                     |
| 2     | Rose-Bengal(5)   | Pyridine | dry DMSO | 36                     |
| 3     | Acridine-red(10) | Pyridine | dry DMSO | 31                     |
| 4     | Rhodamine-B(15)  | Pyridine | dry DMSO | 19                     |

<sup>a</sup>Reaction condition: **1a** (1.0 mmol), **2a** (1.0 mmol), Pyridine (3 equiv), catalysts (mol%), dry DMSO (5 mL) at room temperature, for 40-45 min, and irradiate under blue LED. <sup>b</sup> Isolated yield.

## 8. Comparison Table

**Table S3.** Advantages and disadvantages of methods used for C-arylation of active methylene compounds.<sup>47-49.</sup>

| S.no. | Methods used                                                                                                                                                            | Advantages and disadvantages                                                                                                                                                                                                                                                           | Time       |
|-------|-------------------------------------------------------------------------------------------------------------------------------------------------------------------------|----------------------------------------------------------------------------------------------------------------------------------------------------------------------------------------------------------------------------------------------------------------------------------------|------------|
| 1.    | <i>Iodobenzene + acetylacetone + Cs<sub>2</sub>CO<sub>3</sub> at 80 °C in DMSO, in the presence of CuO-nanoparticles</i>                                                | <b>Disadvantages:</b> <ul style="list-style-type: none"> <li>• Use of CuO nanoparticles catalyst</li> <li>• High temperature</li> <li>• Long reaction time</li> </ul>                                                                                                                  | 8-10h      |
| 2.    | <i>2-aryl-1,3-dicarbonyl+ aryl iodides and aryl bromides in DMSO at 40-50°C in the presence of Cs<sub>2</sub>CO<sub>3</sub>, by a CuI/L-proline-catalyzed compounds</i> | <b>Disadvantages:</b> <ul style="list-style-type: none"> <li>• Use of proline and CuI catalyst</li> <li>• Long reaction time</li> </ul>                                                                                                                                                | 4-24h      |
| 3.    | <i>Sonochemical arylation of active methylene compounds and haloarene in DMSO + potassium carbonate heated at 100-150 °C</i>                                            | <b>Disadvantages:</b> <ul style="list-style-type: none"> <li>• High temperature</li> <li>• Energy-intensive</li> </ul>                                                                                                                                                                 | 30 min.    |
| 4.    | <i>Visible light mediated diazonium salt+ active-methylene compounds+dry DMSO (this study)</i>                                                                          | <b>No such disadvantages</b><br><br><b>Advantages:</b> <ul style="list-style-type: none"> <li>• No metal catalyst</li> <li>• Dry DMSO used as solvent.</li> <li>• Greener approach as visible light</li> <li>• Easy work-up</li> <li>• Via EDA complex</li> <li>• Less-time</li> </ul> | 40-45 min. |

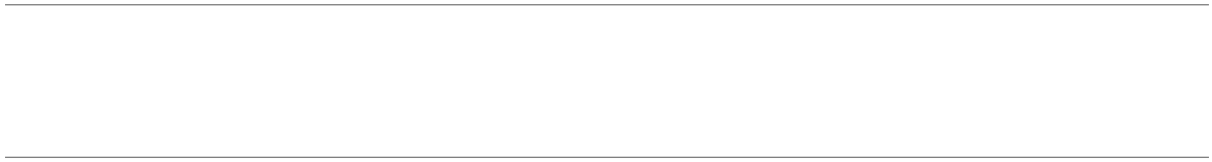

Supplement: d3cc05356c1.pdf [file d3cc05356c1.pdf]
